# Supplementary material for: State monitoring and fault prediction of centrifugal compressors based on long short–term memory and principal component analysis (LSTM-PCA)
Source: PeerJ Comput Sci. 2024 Oct 21;10:e2433. doi: 10.7717/peerj-cs.2433 (PMC11623196; doi:10.7717/peerj-cs.2433)
Supplement: Supplemental Information 2 [file peerj-cs-10-2433-s002.xlsx]

## Sheet: Sheet1
2022-10-15 19:26:00	14.18	65	73	63	63	57	63.02	75	78	66	68	51.78
2022-10-15 19:27:00	14.16	65	73	63	63	57	63.02	75	77	66	68	51.85
2022-10-15 19:28:00	14.05	65	73	63	63	57	63	75	77	66	68	51.76
2022-10-15 19:31:00	13.89	65	73	63	63	57	63.24	75	77	66	68	52.05
2022-10-15 19:32:00	14.1	65	73	63	63	57	63.24	75	77	66	69	52.07
2022-10-15 19:33:00	13.98	65	73	63	63	57	63.23	75	78	66	69	52.17
2022-10-15 19:34:00	14.19	65	73	63	63	57	63.23	75	78	67	69	51.76
2022-10-15 19:35:00	14.04	65	73	63	63	57	63.23	76	78	67	69	51.76
2022-10-15 19:37:00	13.96	65	73	63	64	58	63.22	76	79	67	70	51.85
2022-10-15 19:38:00	14.05	65	73	63	63	57	63.2	77	79	68	70	51.86
2022-10-15 19:39:00	14.05	65	73	63	63	57	63.2	77	79	68	70	51.97
2022-10-15 19:40:00	14.11	65	73	63	64	57	63.19	76	78	67	69	51.76
2022-10-15 19:41:00	14.11	65	73	63	63	57	63.19	75	78	67	69	52
2022-10-15 19:42:00	14	65	73	64	63	57	63.17	75	77	66	68	52.1
2022-10-15 19:43:00	14.23	65	73	63	63	58	63.18	75	77	66	68	52.07
2022-10-15 19:44:00	14.02	65	73	63	63	58	63.17	75	77	66	68	52.18
2022-10-15 19:45:00	14.1	65	73	63	63	58	63.15	75	77	66	68	52.01
2022-10-15 19:46:00	14.05	65	73	64	63	57	63.16	75	77	66	68	52.01
2022-10-15 19:48:00	14.01	65	73	64	63	57	63.15	75	78	66	69	52.18
2022-10-15 19:49:00	14	65	73	64	63	57	63.14	75	78	67	69	52.22
2022-10-15 19:50:00	14.02	65	73	63	63	57	63.14	76	78	67	70	52.01
2022-10-15 19:51:00	14.04	65	73	63	64	58	63.14	76	79	67	70	51.93
2022-10-15 19:52:00	14.16	65	73	63	63	57	64.28	77	79	68	70	51.89
2022-10-15 19:54:00	14.07	65	73	63	63	57	63.14	76	79	67	70	51.92
2022-10-15 19:55:00	14.21	65	73	63	63	58	63.14	75	78	67	69	52
2022-10-15 19:56:00	14.07	65	73	63	63	58	63.13	75	78	66	69	52.1
2022-10-15 19:57:00	14.1	65	73	63	63	57	63.12	75	77	66	68	52.2
2022-10-15 19:58:00	14.2	65	73	63	63	57	63.12	75	77	66	68	52.02
2022-10-15 19:59:00	14.06	65	73	63	63	57	63.11	75	77	66	68	52.11
2022-10-15 20:00:00	14.13	65	73	63	63	58	63.11	75	77	66	69	52.04
2022-10-15 20:02:00	14.16	65	73	63	63	58	63.11	75	77	66	69	52.11
2022-10-15 20:03:00	14.3	65	73	64	64	57	63.1	75	78	66	69	52.05
2022-10-15 20:04:00	14.05	65	73	63	64	58	63.11	75	78	67	69	52.08
2022-10-15 20:05:00	14.02	65	73	64	63	57	63.1	76	79	67	70	52.13
2022-10-15 20:06:00	14.25	65	73	64	63	58	63.1	76	79	68	70	51.79
2022-10-15 20:07:00	14.06	65	73	64	63	57	63.1	77	79	68	70	51.87
2022-10-15 20:08:00	14.01	65	73	64	63	58	63.1	76	78	67	69	51.89
2022-10-15 20:10:00	14.3	65	73	63	64	58	63.1	76	78	67	69	52.13
2022-10-15 20:11:00	13.96	65	73	64	63	58	63.09	75	77	66	69	52
2022-10-15 20:12:00	14.05	65	73	63	63	57	63.09	75	77	66	68	52.13
2022-10-15 20:13:00	14.13	65	73	63	63	57	63.09	75	77	66	68	52.08
2022-10-15 20:14:00	14.06	65	74	64	64	57	64.16	75	77	66	68	52.08
2022-10-15 20:15:00	14.15	65	73	64	63	58	63.08	75	77	66	69	52.03
2022-10-15 20:16:00	13.94	65	73	63	63	57	63.08	75	77	66	69	52.08
2022-10-15 20:17:00	14.09	65	73	64	63	57	63.08	75	78	67	69	52.11
2022-10-15 20:19:00	14.04	65	74	63	64	58	64.15	76	78	67	70	52.15
2022-10-15 20:20:00	14.11	65	73	63	64	58	63.08	76	78	67	70	52.01
2022-10-15 20:21:00	14.05	65	73	64	64	58	63.06	77	79	68	70	52.12
2022-10-15 20:22:00	14.04	65	73	63	63	58	63.06	77	79	68	70	51.9
2022-10-15 20:23:00	14.05	65	73	64	63	58	63.05	76	79	67	70	51.93
2022-10-15 20:24:00	14.15	65	73	63	63	58	63.05	75	78	67	69	52.02
2022-10-15 20:25:00	14.01	65	73	64	63	57	63.06	75	78	66	68	52.11
2022-10-15 20:26:00	14.14	65	73	64	63	57	63.05	75	77	66	68	52.21
2022-10-15 20:28:00	14.15	65	74	63	63	57	63.05	75	77	66	68	52.14
2022-10-15 20:29:00	14.05	65	73	64	63	57	63.05	75	77	66	68	52.09
2022-10-15 20:30:00	14.11	65	73	63	63	57	63.04	75	77	66	68	52.24
2022-10-15 20:31:00	14.06	65	73	63	63	57	63.04	75	77	66	69	52.01
2022-10-15 20:32:00	14.16	65	73	63	63	57	63.04	75	78	66	69	52.21
2022-10-15 20:33:00	14.06	65	73	64	64	57	63.04	75	78	67	69	52.06
2022-10-15 20:33:00	13.93	65	73	63	63	57	63.04	75	78	67	69	52.21
2022-10-15 20:34:00	13.94	65	73	63	64	57	63.04	76	78	67	69	52.01
2022-10-15 20:35:00	14.14	65	74	63	64	57	63.04	76	78	67	70	52.11
2022-10-15 20:36:00	14.2	65	73	64	63	57	63.03	77	79	67	70	51.97
2022-10-15 20:37:00	14.14	65	73	63	63	57	63.02	77	79	67	70	51.99
2022-10-15 20:38:00	14.07	65	73	63	64	57	63.02	76	78	67	69	51.98
2022-10-15 20:39:00	14.14	65	73	63	63	57	63.01	75	78	67	69	52.2
2022-10-15 20:40:00	14.2	65	73	63	63	57	63.02	75	78	66	69	52.09
2022-10-15 20:42:00	14.04	65	73	63	63	58	63.03	75	77	66	69	52.11
2022-10-15 20:43:00	14.04	65	73	63	63	57	63.02	75	77	66	68	52.14
2022-10-15 20:44:00	14.02	65	73	64	63	57	63.01	75	77	66	69	52.19
2022-10-15 20:45:00	14.18	65	73	63	63	57	63	75	77	66	69	52.15
2022-10-15 20:46:00	14.07	65	73	63	64	58	63	75	78	66	69	52.21
2022-10-15 20:47:00	14.1	65	73	63	63	57	63	75	78	67	69	52.12
2022-10-15 20:48:00	14.19	65	73	63	64	57	63.01	76	78	67	70	52.02
2022-10-15 20:50:00	14	65	73	63	64	57	63	76	78	67	70	52.16
2022-10-15 20:51:00	14.21	65	73	63	63	58	63	77	79	68	70	52.04
2022-10-15 20:52:00	14.3	65	73	63	63	57	63.25	77	79	68	70	52.16
2022-10-15 20:53:00	14.18	65	73	63	63	58	63	76	79	67	70	52.13
2022-10-15 20:54:00	14.07	65	73	63	63	57	63.25	76	78	67	69	52.12
2022-10-15 20:55:00	14.09	65	73	63	63	57	63.24	75	77	66	69	52.03
2022-10-15 20:56:00	14.11	65	73	63	63	58	63.24	75	77	66	68	52.17
2022-10-15 20:57:00	14.01	65	73	63	64	58	63.01	75	77	66	68	52.15
2022-10-15 20:58:00	14.24	65	73	63	63	57	63	75	77	66	68	52.2
2022-10-15 20:59:00	14.2	65	73	63	63	58	63	75	77	66	69	52.07
2022-10-15 21:01:00	14.16	65	73	63	64	58	63.01	75	77	66	69	52.1
2022-10-15 21:02:00	14.16	65	74	63	63	58	63	75	78	67	69	52
2022-10-15 21:03:00	14.16	65	73	64	63	57	63.01	75	78	67	69	52.25
2022-10-15 21:04:00	14.05	65	73	64	64	58	63.01	76	78	67	70	52.03
2022-10-15 21:05:00	14.11	65	73	63	63	57	63	76	79	68	70	52.19
2022-10-15 21:06:00	14.11	65	73	63	63	57	63	77	79	68	70	52.06
2022-10-15 21:07:00	14.11	65	73	63	63	57	63	76	79	67	70	52.19
2022-10-15 21:08:00	14.15	65	73	63	63	58	63	76	78	67	69	52.2
2022-10-15 21:10:00	14.1	65	73	63	63	58	63	75	78	66	69	52.06
2022-10-15 21:11:00	14.1	65	73	63	63	57	63	75	77	66	68	52.15
2022-10-15 21:12:00	13.98	65	73	63	64	57	63.01	75	77	66	68	52.08
2022-10-15 21:13:00	13.99	65	73	63	64	57	63	75	77	66	68	52.12
2022-10-15 21:14:00	14.13	65	73	63	63	58	63	75	77	66	68	52.24
2022-10-15 21:15:00	13.96	65	73	63	63	57	63.24	75	77	66	69	52
2022-10-15 21:16:00	14.13	65	73	63	63	57	63.24	75	78	66	69	52.17
2022-10-15 21:17:00	14.23	65	74	63	63	57	63.24	75	78	67	69	52.08
2022-10-15 21:18:00	14.15	65	73	63	64	58	63.24	76	78	67	70	52.19
2022-10-15 21:20:00	14.11	65	73	64	64	57	63.24	76	79	67	70	52.09
2022-10-15 21:21:00	14.16	65	73	63	63	57	64.47	77	79	67	70	51.94
2022-10-15 21:22:00	14.15	65	73	63	63	57	63.24	76	78	67	69	51.8
2022-10-15 21:23:00	14.13	65	73	63	63	58	63.24	76	78	67	69	51.79
2022-10-15 21:24:00	14.16	65	73	63	63	57	63.24	75	78	66	69	52.16
2022-10-15 21:25:00	14.1	65	73	64	63	58	63.23	75	77	66	68	52.04
2022-10-15 21:26:00	14.16	65	73	63	63	57	63.23	75	77	66	68	52.1
2022-10-15 21:27:00	14.11	65	73	63	63	58	63.23	75	77	66	68	52.17
2022-10-15 21:28:00	14.16	65	73	63	63	58	63.23	75	77	66	68	52.06
2022-10-15 21:29:00	14.23	65	73	64	63	57	63.22	75	77	66	69	52.09
2022-10-15 21:31:00	14.11	65	73	63	64	58	63.22	75	78	66	69	52.01
2022-10-15 21:32:00	14.06	65	73	64	63	57	63.21	75	78	67	69	52.02
2022-10-15 21:33:00	14.15	65	74	63	64	57	63.22	76	78	67	70	52.03
2022-10-15 21:34:00	14.14	65	73	63	63	57	63.21	76	79	68	70	51.94
2022-10-15 21:35:00	14.23	65	73	63	64	57	63.21	77	79	68	70	51.78
2022-10-15 21:36:00	14.14	65	73	63	63	57	63.21	76	79	67	70	51.85
2022-10-15 21:38:00	14	65	73	63	63	57	63.21	75	78	67	69	52.08
2022-10-15 21:39:00	14.07	65	73	63	64	57	63.21	75	78	66	68	52.23
2022-10-15 21:40:00	14.05	65	73	63	63	58	63.21	75	77	66	68	52.12
2022-10-15 21:41:00	14.06	65	73	63	63	57	63.21	75	77	66	68	52.09
2022-10-15 21:42:00	14.2	65	73	63	63	57	63.21	75	77	66	68	52.16
2022-10-15 21:43:00	14.14	65	74	63	63	57	63.21	75	77	66	68	52.05
2022-10-15 21:44:00	14.13	65	74	64	63	57	63.2	75	77	66	69	52.09
2022-10-15 21:45:00	14.15	65	73	63	64	57	63.2	75	78	66	69	52.01
2022-10-15 21:46:00	14.1	65	73	63	63	57	63.2	76	78	67	69	52.17
2022-10-15 21:47:00	14.16	65	73	63	63	57	63.23	76	78	67	70	52.05
2022-10-15 21:49:00	14.06	65	73	63	63	57	63	76	79	68	70	52.21
2022-10-15 21:50:00	14.18	65	73	63	63	57	63	77	79	68	70	51.92
2022-10-15 21:51:00	14.09	65	74	63	63	57	63.01	76	79	67	69	51.89
2022-10-15 21:52:00	14.11	65	73	63	63	57	63.02	75	78	66	69	52.14
2022-10-15 21:54:00	14.23	65	73	63	63	58	63.02	75	77	66	68	52.2
2022-10-15 21:55:00	14.18	65	73	64	63	57	63.02	75	77	66	68	52.13
2022-10-15 21:56:00	14.04	65	73	63	63	57	63.03	75	77	66	68	52.12
2022-10-15 21:57:00	14.24	65	73	63	63	57	63.03	75	77	66	68	52.18
2022-10-15 21:58:00	14.19	65	73	63	63	57	63.03	75	77	66	68	52.2
2022-10-15 21:59:00	14.07	65	73	64	63	57	63.03	75	77	66	69	52.08
2022-10-15 22:00:00	14.11	65	73	64	63	57	63.03	75	78	67	69	52.2
2022-10-15 22:01:00	14.15	65	73	63	63	57	63.03	76	78	67	70	52.04
2022-10-15 22:03:00	14.16	65	73	63	63	57	63.04	76	78	67	70	51.96
2022-10-15 22:04:00	14.15	65	73	63	63	57	63.04	77	79	67	70	51.82
2022-10-15 22:05:00	14.01	65	73	63	63	57	63.04	76	79	67	70	51.79
2022-10-15 22:06:00	14	65	73	63	64	58	63.04	76	78	67	69	51.87
2022-10-15 22:07:00	14.06	65	73	63	64	57	63.05	75	78	66	69	51.96
2022-10-15 22:08:00	14.14	65	73	63	63	58	63.05	75	77	66	68	52.17
2022-10-15 22:09:00	14.16	65	73	63	63	57	63.06	75	77	66	68	52.12
2022-10-15 22:10:00	14.07	65	73	63	63	57	63.06	75	77	66	68	52.15
2022-10-15 22:12:00	14.1	65	73	63	63	57	63.05	75	77	66	68	52.24
2022-10-15 22:13:00	14.04	65	73	63	63	57	63.05	75	77	66	69	52
2022-10-15 22:14:00	14.06	65	73	63	63	57	63.06	75	77	66	69	52.14
2022-10-15 22:15:00	14.21	65	73	63	63	57	63.06	75	78	67	69	52.02
2022-10-15 22:16:00	14.13	65	73	63	63	57	63.07	76	78	67	70	51.85
2022-10-15 22:17:00	14.11	65	73	63	63	57	63.06	76	78	67	70	51.99
2022-10-15 22:18:00	14.18	65	73	63	63	57	63.07	77	79	68	70	51.76
2022-10-15 22:20:00	14.07	65	73	63	63	57	63.07	76	79	67	70	51.86
2022-10-15 22:21:00	14.15	65	73	63	63	57	63.08	75	78	67	69	51.77
2022-10-15 22:22:00	14.18	65	73	63	63	57	63.08	75	78	66	69	51.86
2022-10-15 22:23:00	14.01	65	73	63	63	57	63.07	75	77	66	68	52.08
2022-10-15 22:24:00	14.01	65	73	63	63	57	63.08	75	77	66	68	52.05
2022-10-15 22:27:00	14.06	65	73	63	63	57	63.06	75	77	66	68	52.24
2022-10-15 22:28:00	14.24	65	73	63	63	57	63.08	75	77	66	69	52.07
2022-10-15 22:29:00	14.05	65	73	63	63	57	63.08	75	78	67	69	52.13
2022-10-15 22:32:00	14.06	65	73	63	63	57	63.07	77	79	67	70	51.9
2022-10-15 22:33:00	14.1	65	73	63	63	57	63.07	76	79	67	70	51.86
2022-10-15 22:34:00	14.02	65	73	63	63	57	63.08	76	78	67	69	51.81
2022-10-15 22:36:00	14	65	73	63	63	57	63.08	75	78	66	69	51.76
2022-10-15 22:37:00	14.11	65	73	63	63	57	63.08	75	77	66	68	52.17
2022-10-15 22:38:00	14.15	65	73	63	63	57	63.09	75	77	66	68	52.04
2022-10-15 22:39:00	14.16	65	73	63	63	58	63.08	75	77	66	68	52.17
2022-10-15 22:40:00	14.09	65	73	63	63	57	63.08	75	77	66	68	52.03
2022-10-15 22:41:00	14.06	65	73	63	63	57	63.1	75	77	66	68	52.22
2022-10-15 22:43:00	14.25	65	73	63	63	57	63.09	75	77	66	69	52.12
2022-10-15 22:44:00	13.99	65	73	63	63	57	63.1	75	78	67	69	52.11
2022-10-15 22:45:00	13.94	65	73	63	63	57	63.08	76	78	67	69	52.16
2022-10-15 22:46:00	14.23	65	73	63	63	58	63.08	76	78	67	70	51.78
2022-10-15 22:47:00	14	65	73	63	63	57	63.08	77	79	67	70	51.89
2022-10-15 22:48:00	14.07	65	73	63	63	57	63.09	77	79	67	70	51.86
2022-10-15 22:49:00	14.02	65	73	63	63	57	63.08	76	78	67	69	51.95
2022-10-15 22:50:00	14.15	65	73	63	63	58	63.08	75	78	66	69	51.82
2022-10-15 22:51:00	14.16	65	73	63	63	57	63.08	75	77	66	68	51.9
2022-10-15 22:53:00	14.21	65	73	63	63	57	63.09	75	77	66	68	52.14
2022-10-15 22:54:00	14.13	65	73	63	63	57	63.14	75	77	66	68	52.16
2022-10-15 22:55:00	14.02	65	73	63	63	58	63.16	75	77	66	68	52.02
2022-10-15 22:56:00	14.13	65	73	63	63	57	63.18	75	77	66	69	52.23
2022-10-15 22:57:00	14.01	65	73	63	63	57	63.19	75	77	66	69	52.12
2022-10-15 22:58:00	14.13	65	73	63	63	57	63.21	75	78	67	69	52.11
2022-10-15 22:59:00	13.99	65	73	63	63	57	63.23	76	78	67	70	51.85
2022-10-15 23:01:00	14.09	65	73	63	63	58	63.23	76	79	67	70	51.79
2022-10-15 23:02:00	13.95	65	73	63	63	57	63.24	77	79	67	70	51.91
2022-10-15 23:03:00	13.99	65	73	63	63	57	63.24	76	79	67	70	51.87
2022-10-15 23:04:00	14.05	65	73	63	63	57	63.24	76	78	67	69	51.93
2022-10-15 23:05:00	14	65	73	63	63	57	63	75	78	66	69	51.75
2022-10-15 23:06:00	14.01	65	73	63	63	57	63.01	75	77	66	68	52.09
2022-10-15 23:07:00	14.06	65	73	63	63	57	63.01	75	77	66	68	52.08
2022-10-15 23:08:00	13.96	65	73	63	63	57	63.03	74	77	66	68	52.11
2022-10-15 23:09:00	14	65	73	63	63	57	63.03	75	77	66	68	52.2
2022-10-15 23:10:00	14.1	65	73	63	63	57	63.04	75	77	66	69	52.19
2022-10-15 23:12:00	14.1	65	73	63	63	57	63.05	75	77	66	69	52.09
2022-10-15 23:13:00	14.04	65	73	63	63	57	63.05	75	78	66	69	52.08
2022-10-15 23:14:00	14.04	65	73	63	63	57	63.05	75	78	67	70	51.91
2022-10-15 23:15:00	14.15	65	73	63	63	57	63.05	76	78	67	70	51.76
2022-10-15 23:16:00	14.18	65	73	63	63	57	63.06	76	79	68	70	51.87
2022-10-15 23:17:00	14.05	65	73	63	63	57	63.06	76	79	67	70	51.83
2022-10-15 23:18:00	14.1	65	73	63	63	57	63.07	76	78	67	69	51.88
2022-10-15 23:19:00	14.06	65	73	63	63	57	63.08	75	78	66	69	52
2022-10-15 23:21:00	14	65	73	63	64	57	63.08	75	77	66	68	51.84
2022-10-15 23:22:00	14.15	65	73	63	63	57	63.08	75	77	66	68	52.1
2022-10-15 23:23:00	14.02	65	73	63	63	57	63.08	74	77	66	68	52.13
2022-10-15 23:24:00	14.01	65	73	63	63	57	63.08	75	77	66	68	52.01
2022-10-15 23:25:00	13.98	65	73	63	63	57	63.09	75	77	66	69	52.24
2022-10-15 23:26:00	14.1	65	73	63	63	57	63.08	75	77	66	69	52.14
2022-10-15 23:28:00	14.01	65	73	63	63	57	63.09	75	78	67	69	51.8
2022-10-15 23:29:00	14.04	65	73	63	63	57	63.09	76	78	67	70	51.81
2022-10-15 23:30:00	14.1	65	73	63	63	57	63.1	76	79	67	70	51.92
2022-10-15 23:31:00	13.93	65	73	63	63	58	63.1	76	78	67	70	51.92
2022-10-15 23:32:00	14.16	65	73	63	63	57	63.1	76	78	67	69	51.82
2022-10-15 23:34:00	14.04	65	73	63	63	57	63.1	75	78	66	69	51.99
2022-10-15 23:35:00	14.1	65	73	63	63	57	63.11	75	77	66	68	51.93
2022-10-15 23:36:00	14.09	65	73	63	63	57	63.12	75	77	66	68	51.89
2022-10-15 23:37:00	14.16	65	73	63	63	57	63.12	75	77	66	68	52.19
2022-10-15 23:38:00	14.04	65	73	63	63	57	63.12	75	77	66	68	52
2022-10-15 23:39:00	14.11	65	73	63	63	57	63.13	75	77	66	68	52.02
2022-10-15 23:40:00	14	65	73	63	63	57	63.14	75	77	66	69	51.91
2022-10-15 23:41:00	14.05	65	73	63	63	57	63.14	75	78	67	69	51.88
2022-10-15 23:42:00	13.88	65	73	63	63	57	63.14	76	78	67	69	51.83
2022-10-15 23:44:00	14.24	65	73	63	63	57	63.14	76	78	67	70	51.92
2022-10-15 23:45:00	14.02	65	73	63	63	57	63.15	76	78	67	70	51.99
2022-10-15 23:46:00	14.05	65	73	63	63	57	63.15	76	78	67	69	51.95
2022-10-15 23:47:00	13.94	65	73	63	63	57	63.16	76	78	67	69	51.79
2022-10-15 23:48:00	14.04	65	73	63	63	57	63.16	75	77	66	69	51.93
2022-10-15 23:49:00	14.05	65	73	63	63	57	63.16	75	77	66	68	51.8
2022-10-15 23:50:00	14.1	65	73	63	63	57	63.17	75	77	66	68	51.87
2022-10-15 23:51:00	14.07	65	73	63	63	57	63.17	75	77	66	68	52.16
2022-10-15 23:53:00	14.14	65	73	63	63	57	63.18	74	77	66	68	52.01
2022-10-15 23:54:00	14.04	65	73	63	63	57	63.18	75	77	66	69	52.04
2022-10-15 23:55:00	14.13	65	73	63	63	57	63.18	75	77	66	69	52.2
2022-10-15 23:56:00	14.02	65	73	63	63	57	63.18	75	78	67	69	51.92
2022-10-15 23:57:00	14.15	65	73	63	63	58	63.19	75	78	67	69	51.87
2022-10-15 23:58:00	14.13	65	73	63	63	57	63.19	76	78	67	70	51.94
2022-10-15 23:59:00	13.94	65	73	63	63	57	63.19	76	78	67	70	51.98
2022-10-16	14.1	65	73	63	63	57	63.21	76	78	67	69	51.9
2022-10-16 00:01:00	14	65	73	63	63	57	63.2	75	78	67	69	51.98
2022-10-16 00:03:00	14.07	65	73	63	63	57	63.21	75	77	66	69	51.89
2022-10-16 00:04:00	14.18	65	74	63	63	57	63.2	75	77	66	68	51.8
2022-10-16 00:05:00	13.91	65	73	63	63	57	63.21	75	77	66	68	51.85
2022-10-16 00:06:00	14	65	73	63	63	57	63.22	74	77	66	68	52.08
2022-10-16 00:07:00	13.81	65	73	63	63	57	63.22	75	77	66	68	52.02
2022-10-16 00:08:00	14.11	65	73	63	63	57	63.23	75	77	66	69	52.09
2022-10-16 00:09:00	14.04	65	73	63	63	57	63.23	75	77	66	69	51.78
2022-10-16 00:10:00	14.01	65	73	63	63	57	63.23	75	78	67	69	51.96
2022-10-16 00:12:00	14.06	65	73	63	63	57	63.23	76	78	67	70	51.82
2022-10-16 00:13:00	14.1	65	73	63	63	57	63.23	76	78	67	70	51.83
2022-10-16 00:14:00	14.06	65	73	63	63	57	63.23	76	79	67	70	51.76
2022-10-16 00:15:00	14.05	65	73	63	63	57	63.24	76	78	67	69	51.93
2022-10-16 00:16:00	14.05	65	73	63	63	57	63.24	75	77	66	68	51.92
2022-10-16 00:17:00	13.95	65	73	63	63	57	63.24	75	77	66	68	51.77
2022-10-16 00:18:00	13.95	65	73	63	63	57	63.24	75	77	66	68	51.94
2022-10-16 00:19:00	14.07	65	73	63	63	57	63.24	74	77	66	68	52.18
2022-10-16 00:21:00	13.99	65	73	63	63	57	63	74	77	66	68	52.23
2022-10-16 00:22:00	14.01	65	73	63	63	57	63.25	75	77	66	68	52.23
2022-10-16 00:23:00	14	65	73	63	63	57	63	75	77	66	69	52.1
2022-10-16 00:24:00	14.11	65	73	63	63	57	63.25	75	78	66	69	51.85
2022-10-16 00:25:00	14.05	65	73	63	63	57	63.25	76	78	67	70	51.84
2022-10-16 00:26:00	13.98	65	73	63	63	57	63.01	76	78	67	70	51.98
2022-10-16 00:27:00	14.07	65	73	63	63	57	63.01	76	79	68	70	52
2022-10-16 00:28:00	14.11	65	73	63	63	57	63.01	76	78	67	70	51.83
2022-10-16 00:30:00	14.05	65	73	63	63	57	63.01	75	78	67	69	51.89
2022-10-16 00:39:00	14.02	65	73	63	63	57	63.04	75	78	67	69	51.78
2022-10-16 00:41:00	14.05	65	73	63	63	57	63.04	76	79	67	70	51.94
2022-10-16 00:43:00	14.04	65	73	63	63	57	63.04	76	79	67	70	51.79
2022-10-16 00:44:00	14.02	65	73	63	63	57	63.05	75	78	67	69	51.78
2022-10-16 00:45:00	13.95	65	73	63	63	57	63.06	75	78	66	68	51.88
2022-10-16 00:46:00	14.05	65	73	63	63	57	63.06	74	77	66	68	51.79
2022-10-16 00:48:00	13.96	65	73	63	63	57	63.06	74	77	66	68	51.77
2022-10-16 00:49:00	13.98	65	73	63	63	57	63.06	74	77	65	68	52
2022-10-16 00:50:00	14.01	64	73	63	63	57	63.07	74	77	66	68	52.17
2022-10-16 00:51:00	13.99	65	73	63	63	57	63.08	75	77	66	69	51.81
2022-10-16 00:52:00	13.99	64	73	63	63	57	63.08	75	78	66	69	51.79
2022-10-16 00:53:00	13.99	65	73	63	63	57	63.08	75	78	67	69	51.79
2022-10-16 00:55:00	13.99	64	73	63	63	57	63.08	76	78	67	70	51.92
2022-10-16 00:56:00	13.98	64	73	63	63	57	63.08	76	79	67	70	51.8
2022-10-16 00:57:00	14.04	65	73	63	63	57	63.09	76	78	67	69	51.8
2022-10-16 00:58:00	14	64	73	63	63	57	63.09	75	78	67	69	51.87
2022-10-16 00:59:00	14.02	65	73	63	63	57	63.09	75	77	66	68	51.76
2022-10-16 01:01:00	14.02	65	73	63	63	57	63.1	75	77	66	68	51.98
2022-10-16 01:01:00	14.09	65	72	63	63	57	63.11	74	77	66	68	51.83
2022-10-16 01:02:00	14.01	64	73	63	63	57	63.11	74	77	66	68	51.95
2022-10-16 01:02:00	14.05	64	73	63	63	57	63.11	74	77	65	68	52.09
2022-10-16 01:03:00	14.01	64	73	63	63	57	63.11	74	77	66	68	52.2
2022-10-16 01:04:00	14.1	65	73	63	63	57	63.12	74	77	66	68	52.16
2022-10-16 01:06:00	14.06	64	73	63	63	57	63.12	75	77	66	69	51.83
2022-10-16 01:07:00	14	65	73	63	63	57	63.13	75	78	66	69	51.82
2022-10-16 01:08:00	14.02	65	73	63	63	57	63.14	75	78	67	69	51.87
2022-10-16 01:09:00	13.9	65	73	63	63	57	63.13	76	78	67	70	51.97
2022-10-16 01:10:00	14.02	64	73	63	63	57	63.14	76	79	67	70	51.79
2022-10-16 01:11:00	14.01	64	73	63	63	57	63.15	76	78	67	70	51.78
2022-10-16 01:13:00	13.95	64	73	63	63	57	63.16	75	78	67	69	51.86
2022-10-16 01:14:00	14.09	65	73	63	63	57	63.16	75	77	66	68	51.77
2022-10-16 01:15:00	13.98	65	73	63	63	57	63.18	74	77	66	68	51.9
2022-10-16 01:16:00	14.05	65	73	63	63	57	63.18	74	77	66	68	51.98
2022-10-16 01:17:00	14.04	65	73	63	63	57	63.18	74	77	65	68	51.81
2022-10-16 01:19:00	14.06	65	73	63	63	57	63.19	74	77	66	68	51.97
2022-10-16 01:20:00	14.01	65	73	63	63	57	63.19	75	77	66	69	51.81
2022-10-16 01:21:00	14	65	73	63	63	57	63.19	75	77	66	69	51.77
2022-10-16 01:22:00	14.02	64	73	63	63	57	63.2	76	78	67	69	51.96
2022-10-16 01:23:00	13.99	64	73	63	63	57	63.2	76	78	67	70	51.85
2022-10-16 01:25:00	14	64	73	63	63	57	63.21	76	79	67	70	51.92
2022-10-16 01:26:00	14.01	64	73	63	63	57	63.22	76	79	67	70	51.85
2022-10-16 01:27:00	14	65	73	63	63	57	63.21	76	78	67	69	51.76
2022-10-16 01:28:00	14.02	65	73	63	63	57	63.22	75	77	66	68	51.94
2022-10-16 01:29:00	13.91	65	73	63	63	57	63.22	75	77	66	68	51.75
2022-10-16 01:30:00	14.04	64	73	63	63	57	63.22	74	77	65	68	51.99
2022-10-16 01:31:00	13.99	64	73	63	63	57	63.23	74	77	66	68	51.77
2022-10-16 01:33:00	13.98	64	73	63	63	57	63.24	74	77	66	68	51.85
2022-10-16 01:34:00	13.98	64	73	63	63	57	63.24	75	77	66	68	51.89
2022-10-16 01:35:00	13.94	64	72	63	63	57	63.25	75	77	66	69	51.93
2022-10-16 01:36:00	13.91	64	73	63	63	57	63.01	75	78	67	69	51.88
2022-10-16 01:38:00	14.09	64	73	63	63	57	63.02	76	78	67	70	52
2022-10-16 01:39:00	14.02	64	72	63	63	57	63.03	76	78	67	70	51.78
2022-10-16 01:40:00	13.95	64	73	63	63	57	63.03	76	78	67	70	51.93
2022-10-16 01:41:00	13.94	64	73	63	63	57	63.03	76	78	67	69	51.85
2022-10-16 01:43:00	14	64	73	63	63	57	63.04	75	77	66	68	51.83
2022-10-16 01:44:00	14.07	64	72	63	63	57	63.05	74	77	66	68	51.8
2022-10-16 01:45:00	14.05	65	73	63	63	57	63.06	74	77	65	68	51.76
2022-10-16 01:46:00	13.96	64	73	63	63	57	63.06	74	77	66	68	51.81
2022-10-16 01:47:00	14.07	64	73	63	63	57	63.06	74	77	65	68	51.94
2022-10-16 01:48:00	14.01	64	73	63	63	57	63.06	75	77	66	68	51.99
2022-10-16 01:49:00	13.88	64	72	63	63	57	63.07	75	77	66	69	51.95
2022-10-16 01:50:00	13.85	64	72	63	63	57	63.07	75	78	67	69	51.95
2022-10-16 01:52:00	13.81	64	73	63	63	57	63.08	76	78	67	69	51.93
2022-10-16 01:53:00	13.9	64	73	63	63	57	63.08	76	78	67	70	51.79
2022-10-16 01:54:00	14.06	64	72	63	63	57	63.08	76	78	67	70	51.94
2022-10-16 01:55:00	13.93	64	73	63	63	57	63.08	76	78	67	69	51.94
2022-10-16 01:56:00	13.82	64	73	63	63	57	63.08	75	78	66	69	51.93
2022-10-16 01:57:00	13.91	64	73	63	63	57	62.09	75	77	66	68	51.83
2022-10-16 01:59:00	13.91	64	73	63	63	57	62.09	74	77	66	68	51.98
2022-10-16 02:00:00	13.91	64	73	63	63	57	63.09	74	77	66	68	51.97
2022-10-16 02:01:00	14.01	64	72	63	62	57	63.11	74	77	65	68	51.97
2022-10-16 02:03:00	13.75	64	73	63	63	57	63.12	75	77	66	69	51.79
2022-10-16 02:04:00	13.89	64	73	63	62	57	63.12	75	78	66	69	51.91
2022-10-16 02:05:00	14.04	64	72	63	63	57	63.12	75	78	67	69	51.97
2022-10-16 02:07:00	13.81	64	72	63	63	57	63.12	76	78	67	70	51.76
2022-10-16 02:07:00	14.11	64	72	63	63	57	63.12	76	78	67	70	51.95
2022-10-16 02:08:00	13.94	64	72	63	63	57	63.12	76	78	67	70	51.72
2022-10-16 02:09:00	13.95	64	73	63	62	57	62.13	75	78	67	69	51.65
2022-10-16 02:11:00	13.9	64	72	63	63	57	62.13	75	77	66	69	51.8
2022-10-16 02:12:00	13.99	64	72	63	63	57	63.13	75	77	66	68	51.89
2022-10-16 02:13:00	13.95	64	73	63	63	57	62.13	74	77	66	68	51.86
2022-10-16 02:14:00	13.85	64	72	63	63	57	62.14	74	77	66	68	51.87
2022-10-16 02:15:00	13.89	64	72	63	62	57	63.14	74	77	66	68	51.96
2022-10-16 02:16:00	13.94	64	72	63	63	57	62.14	74	77	65	68	51.91
2022-10-16 02:17:00	14.06	64	73	63	62	57	62.14	75	77	66	68	51.98
2022-10-16 02:26:00	13.91	64	72	63	63	57	62.15	74	77	66	68	51.8
2022-10-16 02:31:00	13.96	64	72	63	63	57	62.16	75	77	66	69	51.96
2022-10-16 02:33:00	13.81	64	72	63	62	57	62.16	75	77	66	69	51.77
2022-10-16 02:34:00	13.82	64	73	62	62	57	63.16	75	78	67	69	51.79
2022-10-16 02:35:00	13.91	64	72	62	62	57	62.16	76	78	67	70	51.5
2022-10-16 02:36:00	13.98	64	72	63	63	56	62.16	76	78	67	70	51.58
2022-10-16 02:38:00	13.95	64	72	63	63	57	62.16	76	78	67	69	51.59
2022-10-16 02:39:00	13.85	64	72	63	63	57	63.16	75	78	66	69	51.62
2022-10-16 02:40:00	14.02	64	72	63	63	56	62.17	74	77	66	68	51.55
2022-10-16 02:42:00	13.85	64	72	63	63	57	62.17	74	77	66	68	51.97
2022-10-16 02:43:00	13.96	64	73	63	62	56	62.18	74	77	66	68	51.88
2022-10-16 02:44:00	13.9	64	73	63	62	57	63.18	74	77	66	68	51.97
2022-10-16 02:46:00	14.01	64	72	62	62	57	62.18	75	77	66	69	51.85
2022-10-16 02:47:00	13.99	64	72	63	62	56	62.18	75	78	67	69	51.96
2022-10-16 02:49:00	13.98	64	72	62	62	56	62.18	76	78	67	70	51.72
2022-10-16 02:50:00	13.88	64	72	62	62	57	62.18	76	78	67	70	51.52
2022-10-16 02:51:00	13.89	64	73	63	62	57	63.18	76	78	67	69	51.53
2022-10-16 02:53:00	14.05	64	72	63	63	57	62.18	75	78	67	69	51.64
2022-10-16 02:54:00	13.88	64	72	63	62	57	62.19	75	77	66	68	51.78
2022-10-16 02:55:00	13.96	64	72	63	62	57	62.19	74	77	66	68	51.94
2022-10-16 02:57:00	13.93	64	72	62	62	57	62.2	74	77	66	68	51.91
2022-10-16 02:58:00	13.95	64	72	62	62	57	62.21	74	77	65	68	51.9
2022-10-16 02:59:00	13.88	64	72	62	62	56	62.2	74	77	66	68	51.89
2022-10-16 03:01:00	13.89	64	72	63	62	57	62.21	75	77	66	69	51.92
2022-10-16 03:02:00	13.94	64	72	62	62	57	62.21	75	78	67	69	51.85
2022-10-16 03:04:00	13.94	64	73	62	62	56	62.21	76	78	67	70	51.67
2022-10-16 03:05:00	13.94	64	72	63	62	56	62.21	76	79	67	70	51.69
2022-10-16 03:06:00	13.88	64	72	62	62	57	62.2	76	78	67	69	51.52
2022-10-16 03:08:00	13.9	64	72	62	62	57	62.21	75	78	66	68	51.62
2022-10-16 03:09:00	13.99	64	72	63	63	56	62.21	74	77	66	68	51.98
2022-10-16 03:10:00	13.96	64	72	62	62	57	62.21	74	77	65	68	51.86
2022-10-16 03:11:00	13.93	64	72	62	63	57	62.22	74	77	65	68	51.96
2022-10-16 03:13:00	13.89	64	72	62	62	57	62.22	74	77	66	68	51.8
2022-10-16 03:14:00	13.91	64	72	62	62	56	62.22	75	77	66	68	51.85
2022-10-16 03:15:00	13.96	64	72	63	62	56	62.22	75	77	66	69	51.9
2022-10-16 03:16:00	13.84	64	72	63	62	57	62.22	75	78	66	69	51.98
2022-10-16 03:17:00	13.96	64	72	62	62	56	62.22	75	78	67	69	51.57
2022-10-16 03:19:00	13.93	64	72	62	63	56	62.22	76	78	67	70	51.63
2022-10-16 03:20:00	13.86	64	72	62	62	57	62.22	76	78	67	70	51.67
2022-10-16 03:21:00	13.88	64	72	62	62	57	62.22	76	78	67	69	51.65
2022-10-16 03:22:00	13.88	64	72	62	62	57	62.23	75	77	66	68	51.57
2022-10-16 03:23:00	14.04	64	72	62	62	56	62.22	74	77	66	68	51.64
2022-10-16 03:24:00	13.88	64	72	62	62	56	62.23	74	77	65	68	51.84
2022-10-16 03:26:00	14.05	64	72	62	62	57	62.23	74	77	65	68	51.85
2022-10-16 03:27:00	14.09	64	72	62	62	56	62.24	74	77	65	68	51.92
2022-10-16 03:28:00	13.9	64	72	62	62	56	62.23	74	77	65	68	51.87
2022-10-16 03:29:00	13.93	64	72	62	62	56	62.24	75	77	66	69	51.76
2022-10-16 03:30:00	14.11	64	72	62	62	56	62.24	75	77	66	69	51.86
2022-10-16 03:31:00	13.89	64	72	62	62	57	62.24	75	78	67	69	51.64
2022-10-16 03:32:00	13.91	64	72	62	62	56	62.25	76	78	67	70	51.74
2022-10-16 03:33:00	13.91	64	72	62	62	57	62.25	76	78	67	70	51.55
2022-10-16 03:34:00	13.9	64	72	62	62	57	62.25	76	78	67	70	51.52
2022-10-16 03:36:00	13.98	64	72	62	62	56	62.24	75	78	67	69	51.7
2022-10-16 03:37:00	13.9	64	72	62	62	56	62.24	75	77	66	68	51.68
2022-10-16 03:38:00	13.82	64	72	62	62	56	62.25	74	77	66	68	51.81
2022-10-16 03:39:00	13.84	64	72	62	62	56	62.25	74	77	65	68	51.77
2022-10-16 03:40:00	13.95	64	72	62	62	56	62	74	77	65	68	51.96
2022-10-16 03:41:00	13.96	64	72	62	62	56	62.01	74	77	65	68	51.91
2022-10-16 03:42:00	13.91	64	72	62	62	56	62.01	75	77	66	68	51.97
2022-10-16 03:44:00	13.93	64	72	62	62	56	62.01	75	77	66	69	51.79
2022-10-16 03:45:00	13.81	64	72	62	62	56	62.02	75	78	66	69	51.56
2022-10-16 03:46:00	13.89	64	72	62	62	56	62.02	75	78	67	70	51.56
2022-10-16 03:47:00	13.9	64	72	62	62	56	62.02	76	78	67	70	51.62
2022-10-16 03:48:00	13.82	64	72	62	62	56	62.03	76	78	67	70	51.57
2022-10-16 03:50:00	13.84	64	72	62	62	56	62.03	75	78	67	69	51.7
2022-10-16 03:51:00	13.76	64	72	62	62	56	62.04	75	77	66	68	51.61
2022-10-16 03:52:00	13.96	64	72	62	62	56	62.04	74	77	66	68	51.57
2022-10-16 03:53:00	13.85	64	72	62	62	56	62.04	74	77	65	68	51.76
2022-10-16 03:54:00	13.75	64	72	62	62	56	62.04	74	77	65	68	51.97
2022-10-16 03:56:00	13.82	64	72	62	62	56	62.04	74	77	65	68	51.9
2022-10-16 03:57:00	13.91	64	72	62	62	56	62.04	75	77	66	69	51.78
2022-10-16 03:58:00	13.81	64	72	62	62	56	62.04	75	77	66	69	51.97
2022-10-16 03:59:00	13.81	64	72	62	62	56	62.05	75	78	67	69	51.62
2022-10-16 04:01:00	13.77	64	72	62	62	56	62.06	76	78	67	70	51.55
2022-10-16 04:02:00	13.99	64	72	62	62	56	62.06	76	78	67	70	51.59
2022-10-16 04:03:00	13.7	64	72	62	62	56	62.06	75	78	67	69	51.55
2022-10-16 04:04:00	13.82	64	72	62	62	56	62.07	75	78	67	69	51.64
2022-10-16 04:06:00	13.79	64	72	62	62	56	62.07	74	77	66	68	51.64
2022-10-16 04:07:00	13.81	64	72	62	62	57	62.08	74	77	66	68	51.64
2022-10-16 04:08:00	13.79	64	72	62	62	56	62.08	74	77	65	68	51.8
2022-10-16 04:10:00	13.77	63	72	62	62	56	62.08	74	77	66	68	51.96
2022-10-16 04:11:00	13.74	63	72	62	62	56	62.08	75	77	66	69	51.83
2022-10-16 04:12:00	13.86	64	72	62	62	56	62.08	75	78	66	69	51.67
2022-10-16 04:13:00	13.85	63	72	62	62	56	62.09	75	78	67	69	51.72
2022-10-16 04:15:00	13.85	63	72	62	62	56	62.09	76	78	67	70	51.53
2022-10-16 04:16:00	13.5	63	72	62	62	56	62.1	76	78	67	70	51.62
2022-10-16 04:17:00	13.69	64	72	62	62	56	62.1	76	78	67	70	51.53
2022-10-16 04:18:00	13.71	63	71	62	62	56	62.1	75	77	66	69	51.73
2022-10-16 04:19:00	13.69	64	72	62	62	56	62.1	74	77	66	68	51.55
2022-10-16 04:21:00	13.64	63	72	62	62	56	62.11	74	77	65	68	51.93
2022-10-16 04:21:00	13.74	63	72	62	62	56	62.11	74	77	66	68	51.78
2022-10-16 04:22:00	13.77	63	72	62	62	56	62.11	74	77	65	68	51.77
2022-10-16 04:23:00	13.57	64	72	62	62	56	62.12	74	76	65	68	51.86
2022-10-16 04:24:00	13.56	63	72	62	62	56	62.12	74	77	66	68	51.85
2022-10-16 04:25:00	13.64	63	72	62	62	56	62.12	74	77	66	69	51.75
2022-10-16 04:27:00	13.66	63	72	62	62	56	62.13	75	77	66	69	51.61
2022-10-16 04:28:00	13.65	63	72	62	62	56	62.13	75	78	67	69	51.64
2022-10-16 04:28:00	13.64	63	72	62	62	56	62.13	75	78	67	70	51.54
2022-10-16 04:29:00	13.71	63	71	62	62	56	62.13	75	78	67	69	51.7
2022-10-16 04:30:00	13.73	63	71	62	62	56	62.14	76	78	67	70	51.52
2022-10-16 04:31:00	13.5	63	72	62	62	56	62.14	76	78	67	70	51.75
2022-10-16 04:32:00	13.63	63	72	62	62	56	62.14	75	78	66	69	51.75
2022-10-16 04:33:00	13.65	63	72	62	62	56	62.14	75	77	66	68	51.7
2022-10-16 04:34:00	13.61	63	72	62	61	56	62.15	74	77	66	68	51.63
2022-10-16 04:36:00	13.65	63	72	62	62	56	62.16	74	77	65	68	51.55
2022-10-16 04:37:00	13.57	63	72	62	62	56	62.16	74	77	65	68	51.56
2022-10-16 04:38:00	13.73	64	72	62	62	56	62.16	74	77	65	68	51.66
2022-10-16 04:38:00	13.57	63	71	62	62	55	62.16	74	77	65	68	51.61
2022-10-16 04:39:00	13.68	63	71	62	62	56	62.16	74	77	66	68	51.7
2022-10-16 04:41:00	13.55	63	72	62	62	56	62.16	75	77	66	69	51.52
2022-10-16 04:42:00	13.68	63	72	62	62	56	62.16	75	77	66	69	51.51
2022-10-16 04:43:00	13.56	63	72	62	62	56	62.17	75	78	67	69	51.53
2022-10-16 04:44:00	13.63	63	72	62	62	56	62.16	75	78	67	69	51.72
2022-10-16 04:45:00	13.65	63	71	62	61	56	61.18	75	78	67	69	51.7
2022-10-16 04:46:00	13.68	63	71	62	62	56	62.17	75	78	67	69	51.7
2022-10-16 04:48:00	13.68	63	71	62	62	56	61.18	75	77	66	68	51.68
2022-10-16 04:49:00	13.52	63	72	62	62	56	62.18	74	77	66	68	51.65
2022-10-16 04:50:00	13.66	63	72	62	62	56	61.18	74	77	65	68	51.59
2022-10-16 04:51:00	13.52	63	72	62	62	56	62.19	74	77	65	68	51.52
2022-10-16 04:53:00	13.57	63	72	62	62	56	62.19	74	77	66	68	51.72
2022-10-16 04:54:00	13.63	63	71	62	62	56	62.2	74	77	66	68	51.53
2022-10-16 04:55:00	13.69	63	72	62	62	56	61.2	75	77	66	69	51.59
2022-10-16 04:56:00	13.57	63	72	62	62	55	61.2	75	77	67	69	51.64
2022-10-16 04:57:00	13.61	63	71	62	61	56	62.21	75	78	67	70	51.68
2022-10-16 04:59:00	13.68	63	71	62	61	56	61.2	76	78	67	70	51.67
2022-10-16 05:00:00	13.64	63	72	62	62	56	62.21	76	78	67	69	51.55
2022-10-16 05:01:00	13.63	63	71	62	62	56	62.21	75	77	66	68	51.71
2022-10-16 05:02:00	13.54	63	71	62	62	55	62.22	74	77	66	68	51.51
2022-10-16 05:04:00	13.52	63	71	62	62	56	61.21	74	77	65	68	51.65
2022-10-16 05:05:00	13.5	63	71	61	62	56	62.22	74	76	65	68	51.73
2022-10-16 05:06:00	13.61	63	71	62	62	55	61.22	74	76	65	68	51.81
2022-10-16 05:07:00	13.55	63	71	62	62	55	61.22	74	77	65	68	51.52
2022-10-16 05:08:00	13.61	63	71	62	62	56	61.22	74	77	66	68	51.72
2022-10-16 05:09:00	13.51	63	71	62	61	55	61.22	75	77	66	69	51.72
2022-10-16 05:11:00	13.54	63	71	62	62	55	61.23	75	77	66	69	51.52
2022-10-16 05:12:00	13.6	63	71	61	62	55	61.23	75	78	67	69	51.52
2022-10-16 05:13:00	13.65	63	71	61	61	55	61.23	75	78	67	70	51.61
2022-10-16 05:14:00	13.61	63	71	61	61	55	61.22	75	78	67	69	51.63
2022-10-16 05:15:00	13.55	63	71	61	61	56	62.23	75	77	66	68	51.55
2022-10-16 05:17:00	13.48	63	72	61	61	56	61.23	74	77	66	68	51.65
2022-10-16 05:18:00	13.54	63	72	61	62	55	61.23	74	77	65	68	51.58
2022-10-16 05:19:00	13.54	63	71	61	62	56	61.23	74	77	65	68	51.71
2022-10-16 05:20:00	13.6	63	71	61	61	55	61.23	74	76	65	68	51.57
2022-10-16 05:22:00	13.5	63	71	61	61	56	61.23	74	77	65	68	51.57
2022-10-16 05:23:00	13.65	63	71	61	61	55	61.24	74	77	66	69	51.55
2022-10-16 05:24:00	13.61	63	71	61	61	55	61.23	75	77	66	69	51.56
2022-10-16 05:25:00	13.59	63	71	61	61	55	61.24	75	78	67	69	51.54
2022-10-16 05:27:00	13.64	63	71	61	61	55	61.24	75	78	67	70	51.65
2022-10-16 05:29:00	13.65	63	71	61	61	55	61.24	75	78	67	69	51.48
2022-10-16 05:30:00	13.6	63	71	61	61	55	61.25	75	77	66	68	51.58
2022-10-16 05:32:00	13.39	63	71	61	61	55	61	74	77	65	68	51.72
2022-10-16 05:33:00	13.5	63	71	61	61	55	61	74	76	65	68	51.53
2022-10-16 05:36:00	13.46	62	71	61	61	55	61.02	74	77	65	68	51.54
2022-10-16 05:37:00	13.51	63	71	61	61	55	61.02	74	77	66	69	51.69
2022-10-16 05:38:00	13.54	63	71	61	61	55	61.02	75	77	66	69	51.58
2022-10-16 05:39:00	13.39	63	71	61	61	55	61.01	75	77	67	69	51.65
2022-10-16 05:40:00	13.5	62	71	61	61	55	61.02	75	78	67	69	51.52
2022-10-16 05:42:00	13.55	63	71	61	61	55	61.02	76	78	67	69	51.28
2022-10-16 05:43:00	13.61	63	71	61	61	55	61.02	75	78	67	69	51.37
2022-10-16 05:44:00	13.45	63	71	61	61	55	61.02	75	77	66	68	51.35
2022-10-16 05:45:00	13.52	63	71	61	61	55	61.02	74	77	65	68	51.68
2022-10-16 05:47:00	13.5	63	71	61	61	55	61.03	74	77	65	68	51.55
2022-10-16 05:48:00	13.55	62	71	61	61	55	61.02	74	76	65	68	51.64
2022-10-16 05:49:00	13.55	62	71	61	61	55	61.02	74	76	65	68	51.72
2022-10-16 05:51:00	13.54	62	71	61	61	55	61.02	74	77	66	68	51.62
2022-10-16 05:52:00	13.48	62	71	61	61	55	61.03	74	77	66	69	51.62
2022-10-16 05:53:00	13.55	62	70	61	61	55	61.03	75	77	66	69	51.58
2022-10-16 05:54:00	13.39	62	70	61	61	55	61.04	75	78	67	69	51.4
2022-10-16 05:56:00	13.55	62	71	61	61	55	61.04	75	78	67	70	51.37
2022-10-16 05:57:00	13.56	62	70	61	61	55	61.03	75	78	67	69	51.29
2022-10-16 05:58:00	13.56	62	71	61	61	55	61.03	75	77	66	69	51.34
2022-10-16 05:59:00	13.57	62	71	61	61	55	61.04	74	77	65	68	51.27
2022-10-16 06:01:00	13.31	62	71	61	61	55	61.04	74	76	65	68	51.73
2022-10-16 06:02:00	13.48	62	71	61	61	55	61.04	74	76	65	68	51.73
2022-10-16 06:03:00	13.51	62	71	61	61	55	61.04	74	76	65	68	51.57
2022-10-16 06:04:00	13.38	62	71	61	61	55	61.05	74	77	65	68	51.61
2022-10-16 06:06:00	13.52	62	70	61	61	55	61.05	75	77	66	69	51.65
2022-10-16 06:07:00	13.55	62	70	61	61	55	61.05	75	77	66	69	51.44
2022-10-16 06:08:00	13.48	62	71	61	61	55	61.05	75	78	67	69	51.43
2022-10-16 06:09:00	13.39	62	71	61	61	55	60.05	75	78	67	70	51.37
2022-10-16 06:09:00	13.48	62	71	61	61	55	60.05	75	78	67	70	51.29
2022-10-16 06:10:00	13.41	62	71	61	61	55	61.06	76	78	67	70	51.32
2022-10-16 06:11:00	13.5	62	70	61	61	55	61.05	75	78	67	69	51.37
2022-10-16 06:13:00	13.55	62	71	61	61	55	61.05	75	77	66	68	51.32
2022-10-16 06:14:00	13.46	62	70	61	61	55	61.06	74	77	65	68	51.39
2022-10-16 06:15:00	13.43	62	71	61	61	55	61.06	74	76	65	68	51.53
2022-10-16 06:16:00	13.54	62	71	61	61	55	60.07	74	76	65	68	51.63
2022-10-16 06:18:00	13.35	62	70	61	61	55	61.06	74	76	65	68	51.75
2022-10-16 06:19:00	13.44	62	70	61	61	55	61.07	74	77	66	68	51.58
2022-10-16 06:20:00	13.5	62	70	61	61	55	61.08	74	77	66	69	51.53
2022-10-16 06:21:00	13.32	62	70	61	60	55	61.08	75	77	66	69	51.46
2022-10-16 06:22:00	13.55	62	70	61	60	55	61.08	75	78	67	69	51.29
2022-10-16 06:24:00	13.46	62	70	61	61	55	61.08	75	78	67	70	51.33
2022-10-16 06:25:00	13.46	62	70	61	61	55	60.08	76	78	67	69	51.35
2022-10-16 06:26:00	13.45	62	70	61	60	55	60.09	75	78	67	69	51.4
2022-10-16 06:28:00	13.43	62	70	60	61	55	60.09	74	77	66	68	51.28
2022-10-16 06:29:00	13.35	62	70	61	61	55	61.09	74	76	65	68	51.65
2022-10-16 06:30:00	13.39	62	71	61	61	55	60.1	74	76	65	68	51.73
2022-10-16 06:32:00	13.44	62	70	61	61	55	60.1	74	76	65	68	51.57
2022-10-16 06:33:00	13.46	62	71	61	61	55	60.1	74	77	65	68	51.55
2022-10-16 06:34:00	13.25	62	70	60	60	55	60.11	74	77	66	68	51.73
2022-10-16 06:35:00	13.46	62	70	61	60	55	60.11	75	77	66	69	51.36
2022-10-16 06:36:00	13.38	62	70	61	61	55	60.11	75	77	67	69	51.45
2022-10-16 06:37:00	13.39	62	70	60	60	55	60.12	75	78	67	69	51.31
2022-10-16 06:39:00	13.45	62	70	61	60	55	61.12	75	78	67	70	51.45
2022-10-16 06:40:00	13.25	62	70	60	60	55	60.12	75	78	67	69	51.47
2022-10-16 06:41:00	13.52	62	70	60	60	55	60.13	75	77	66	68	51.36
2022-10-16 06:53:00	13.43	62	70	60	60	54	60.14	75	78	67	69	51.41
2022-10-16 06:56:00	13.46	62	70	60	60	55	60.15	75	77	66	68	51.35
2022-10-16 06:57:00	13.34	62	70	60	60	55	60.15	74	77	65	68	51.49
2022-10-16 06:59:00	13.36	62	70	60	60	55	60.15	74	76	65	68	51.44
2022-10-16 07:00:00	13.41	62	70	61	60	55	60.15	74	76	65	68	51.7
2022-10-16 07:00:00	13.39	62	70	60	60	55	60.15	74	76	65	68	51.61
2022-10-16 07:01:00	13.45	62	70	60	60	55	60.15	74	76	65	68	51.52
2022-10-16 07:02:00	13.38	62	70	60	60	55	60.16	74	77	65	68	51.66
2022-10-16 07:03:00	13.31	62	70	60	60	55	60.15	74	77	66	68	51.37
2022-10-16 07:05:00	13.36	62	70	60	60	55	60.15	75	77	66	69	51.3
2022-10-16 07:06:00	13.36	62	70	60	60	54	60.15	75	77	66	69	51.37
2022-10-16 07:07:00	13.41	62	70	60	60	55	60.15	75	78	67	70	51.38
2022-10-16 07:08:00	13.38	62	70	60	60	54	60.16	75	78	67	69	51.5
2022-10-16 07:09:00	13.36	62	70	60	60	55	60.16	75	78	67	69	51.29
2022-10-16 07:10:00	13.4	62	70	60	60	55	60.16	75	77	66	68	51.25
2022-10-16 07:12:00	13.43	62	70	60	60	55	60.16	74	77	65	68	51.36
2022-10-16 07:13:00	13.36	62	70	60	60	55	60.16	74	76	65	68	51.25
2022-10-16 07:14:00	13.41	62	70	60	60	55	60.16	74	76	65	68	51.63
2022-10-16 07:15:00	13.41	62	70	60	60	54	60.16	74	76	65	68	51.51
2022-10-16 07:17:00	13.31	62	70	60	60	54	60.16	74	77	66	68	51.61
2022-10-16 07:18:00	13.34	62	70	60	60	55	60.16	74	77	66	69	51.43
2022-10-16 07:19:00	13.4	62	70	60	60	54	60.16	75	77	66	69	51.48
2022-10-16 07:21:00	13.49	62	70	60	60	54	60.16	75	78	67	69	51.4
2022-10-16 07:22:00	13.32	62	70	60	60	54	60.16	75	78	67	70	51.48
2022-10-16 07:23:00	13.32	62	70	60	60	55	60.16	75	78	67	69	51.39
2022-10-16 07:24:00	13.25	62	70	60	60	55	60.16	74	77	66	68	51.45
2022-10-16 07:26:00	13.4	62	70	60	60	55	60.16	74	77	65	68	51.27
2022-10-16 07:27:00	13.46	62	70	60	60	55	60.16	74	76	65	68	51.48
2022-10-16 07:28:00	13.31	62	70	60	60	55	60.16	74	76	65	68	51.72
2022-10-16 07:30:00	13.36	62	70	60	60	54	60.15	74	76	65	68	51.5
2022-10-16 07:30:00	13.34	62	70	60	60	54	60.16	74	76	65	68	51.5
2022-10-16 07:31:00	13.39	62	70	60	60	54	60.16	74	77	65	68	51.62
2022-10-16 07:32:00	13.35	62	70	60	60	55	60.16	74	77	66	69	51.32
2022-10-16 07:33:00	13.32	62	70	60	60	55	60.16	74	77	66	69	51.33
2022-10-16 07:34:00	13.31	62	70	60	60	55	60.16	75	77	67	69	51.31
2022-10-16 07:35:00	13.41	62	70	60	60	55	60.15	75	78	67	69	51.48
2022-10-16 07:36:00	13.4	62	70	60	60	55	60.15	75	78	67	69	51.39
2022-10-16 07:37:00	13.36	62	70	60	60	55	60.15	75	78	67	69	51.29
2022-10-16 07:38:00	13.35	62	70	60	60	55	60.15	75	78	67	69	51.31
2022-10-16 07:39:00	13.44	62	70	60	60	55	60.15	74	77	66	68	51.37
2022-10-16 07:40:00	13.36	62	70	60	60	55	60.16	74	77	65	68	51.45
2022-10-16 07:41:00	13.31	62	70	60	60	55	60.15	74	76	65	68	51.46
2022-10-16 07:42:00	13.45	62	70	60	60	55	60.16	74	76	65	68	51.47
2022-10-16 07:44:00	13.48	62	70	60	60	55	60.15	74	76	65	68	51.56
2022-10-16 07:45:00	13.4	62	70	60	60	54	60.16	74	77	66	68	51.63
2022-10-16 07:46:00	13.41	62	70	60	60	54	60.15	74	77	66	69	51.46
2022-10-16 07:48:00	13.38	62	70	60	60	55	60.16	75	77	66	69	51.4
2022-10-16 07:49:00	13.38	62	70	60	60	54	60.16	75	77	67	69	51.47
2022-10-16 07:50:00	13.32	62	70	60	60	55	60.16	75	78	67	69	51.43
2022-10-16 07:51:00	13.35	62	70	60	60	54	60.16	75	78	67	69	51.34
2022-10-16 07:53:00	13.39	62	70	60	60	54	60.16	75	77	66	68	51.37
2022-10-16 07:54:00	13.34	62	70	60	60	54	60.16	74	77	66	68	51.49
2022-10-16 07:55:00	13.31	62	70	60	60	54	60.16	74	76	65	68	51.4
2022-10-16 07:57:00	13.39	62	70	60	60	55	60.16	74	76	65	68	51.74
2022-10-16 07:58:00	13.27	62	70	60	60	54	60.15	74	76	65	68	51.57
2022-10-16 07:59:00	13.41	62	70	60	60	55	60.16	74	77	65	68	51.63
2022-10-16 08:00:00	13.25	62	70	60	60	55	60.16	74	77	66	69	51.43
2022-10-16 08:02:00	13.25	62	70	60	60	55	60.15	75	77	66	69	51.46
2022-10-16 08:03:00	13.43	62	70	60	60	55	60.16	75	78	67	69	51.48
2022-10-16 08:04:00	13.31	62	70	60	60	55	60.14	75	78	67	70	51.32
2022-10-16 08:05:00	13.31	62	70	60	60	55	60.11	75	78	67	69	51.4
2022-10-16 08:07:00	13.29	62	70	60	60	55	60.09	75	77	66	68	51.46
2022-10-16 08:08:00	13.32	62	70	60	60	55	60.08	74	77	66	68	51.33
2022-10-16 08:09:00	13.36	62	70	60	60	55	60.06	74	77	65	68	51.48
2022-10-16 08:10:00	13.3	62	70	60	60	55	60.06	74	76	65	68	51.68
2022-10-16 08:11:00	13.35	62	70	60	60	54	60.05	74	76	65	68	51.64
2022-10-16 08:13:00	13.26	62	70	60	60	55	60.04	74	76	65	68	51.61
2022-10-16 08:14:00	13.25	62	70	60	60	55	60.03	74	77	66	69	51.56
2022-10-16 08:15:00	13.29	62	70	60	60	55	60	74	77	66	69	51.31
2022-10-16 08:16:00	13.25	62	70	60	60	55	60.24	75	78	67	69	51.31
2022-10-16 08:17:00	13.23	62	70	60	60	55	60.24	75	78	67	69	51.42
2022-10-16 08:19:00	13.31	62	70	60	60	55	60.23	75	78	67	69	51.36
2022-10-16 08:20:00	13.21	62	70	60	60	55	60.22	75	78	67	69	51.44
2022-10-16 08:21:00	13.18	62	70	60	60	55	60.21	74	77	66	68	51.3
2022-10-16 08:22:00	13.26	62	70	60	60	55	60.21	74	77	65	68	51.38
2022-10-16 08:23:00	13.26	62	70	60	60	55	60.2	74	76	65	68	51.59
2022-10-16 08:25:00	13.25	62	70	60	60	55	60.19	74	76	65	68	51.59
2022-10-16 08:26:00	13.21	62	70	60	60	55	60.19	74	76	65	68	51.63
2022-10-16 08:27:00	13.27	62	70	60	60	55	60.19	74	77	65	68	51.66
2022-10-16 08:29:00	13.32	62	70	60	60	55	60.19	74	77	66	69	51.67
2022-10-16 08:30:00	13.3	62	70	60	60	55	60.18	75	77	66	69	51.36
2022-10-16 08:31:00	13.25	62	70	60	60	55	60.16	75	78	67	70	51.42
2022-10-16 08:32:00	13.34	62	70	60	60	55	60.16	75	78	67	70	51.35
2022-10-16 08:33:00	13.34	62	70	60	60	55	60.15	75	78	67	69	51.46
2022-10-16 08:35:00	13.35	62	70	60	60	55	60.14	75	78	67	69	51.41
2022-10-16 08:36:00	13.29	62	70	60	60	55	60.12	74	77	66	68	51.38
2022-10-16 08:37:00	13.23	62	70	60	60	55	60.11	74	77	65	68	51.71
2022-10-16 08:38:00	13.35	62	70	60	60	55	60.1	74	77	65	68	51.63
2022-10-16 08:39:00	13.3	62	70	60	60	55	60.09	74	76	65	68	51.52
2022-10-16 08:40:00	13.35	62	70	60	60	55	61.07	74	77	65	68	51.64
2022-10-16 08:42:00	13.27	62	70	60	60	55	60.06	74	77	66	68	51.72
2022-10-16 08:43:00	13.23	62	70	60	61	55	60.03	75	77	66	69	51.54
2022-10-16 08:44:00	13.27	62	70	60	60	55	60.02	75	77	67	69	51.59
2022-10-16 08:45:00	13.26	62	70	61	60	55	60.25	75	78	67	70	51.38
2022-10-16 08:47:00	13.39	62	70	61	61	55	60.23	76	78	67	70	51.48
2022-10-16 08:48:00	13.44	62	71	61	60	55	60.22	76	78	67	70	51.46
2022-10-16 08:49:00	13.32	62	70	61	60	55	60.19	75	77	66	68	51.38
2022-10-16 08:51:00	13.35	62	70	61	60	55	60.16	74	77	65	68	51.51
2022-10-16 08:52:00	13.43	62	71	61	61	55	60.16	74	77	65	68	51.67
2022-10-16 08:53:00	13.39	62	70	61	61	55	61.13	74	77	65	68	51.54
2022-10-16 08:54:00	13.46	62	70	61	61	55	60.13	74	77	65	68	51.67
2022-10-16 08:56:00	13.5	62	71	61	61	55	61.12	74	77	66	68	51.69
2022-10-16 08:57:00	13.51	62	70	61	60	55	61.09	75	77	66	69	51.62
2022-10-16 08:58:00	13.5	62	71	61	61	55	61.06	75	78	67	69	51.55
2022-10-16 08:59:00	13.49	62	71	61	61	55	61.05	75	78	67	69	51.65
2022-10-16 09:00:00	13.68	62	70	61	61	55	61.03	76	78	67	70	51.47
2022-10-16 09:01:00	13.56	62	70	61	61	55	61.01	76	78	67	70	51.46
2022-10-16 09:03:00	13.57	62	71	61	61	55	61.01	76	78	67	69	51.48
2022-10-16 09:04:00	13.68	62	71	61	61	55	61.24	75	77	66	69	51.54
2022-10-16 09:05:00	13.74	62	70	61	61	55	61.23	74	77	66	68	51.63
2022-10-16 09:06:00	13.69	62	71	61	61	55	61.22	74	77	65	68	51.62
2022-10-16 09:07:00	13.74	63	71	61	61	55	61.2	74	77	65	68	51.53
2022-10-16 09:09:00	13.66	63	71	61	61	55	61.19	74	77	65	68	51.67
2022-10-16 09:10:00	13.8	62	71	61	61	55	61.16	75	77	66	68	51.75
2022-10-16 09:11:00	13.63	63	71	61	61	55	61.14	75	77	66	69	51.7
2022-10-16 09:12:00	13.77	63	71	61	61	56	61.13	75	78	67	69	51.63
2022-10-16 09:14:00	13.8	63	71	61	61	55	61.11	76	78	67	70	51.7
2022-10-16 09:15:00	13.8	63	71	61	62	55	61.11	76	79	67	70	51.55
2022-10-16 09:16:00	13.85	63	71	61	61	55	61.09	76	78	67	69	51.52
2022-10-16 09:17:00	13.81	63	71	62	61	55	61.08	75	78	67	69	51.59
2022-10-16 09:19:00	13.71	63	71	61	61	55	61.06	75	77	66	68	51.74
2022-10-16 09:20:00	13.77	63	71	62	61	56	61.05	74	77	66	68	51.72
2022-10-16 09:21:00	13.86	63	71	62	61	55	61.04	74	77	66	68	51.95
2022-10-16 09:23:00	13.73	63	72	62	62	56	61.03	74	77	65	68	51.98
2022-10-16 09:24:00	13.91	63	71	62	62	56	61.02	75	77	66	68	51.97
2022-10-16 09:25:00	13.79	63	72	62	62	56	62.01	75	78	66	69	51.94
2022-10-16 09:26:00	13.81	63	71	62	62	56	62	75	78	66	69	51.96
2022-10-16 09:27:00	13.93	63	72	62	61	56	62	76	78	67	70	51.55
2022-10-16 09:29:00	14.01	63	71	62	62	56	62.22	76	79	67	70	51.66
2022-10-16 09:30:00	13.95	63	72	62	62	56	62.21	76	79	67	70	51.56
2022-10-16 09:31:00	14.04	63	71	62	62	56	62.2	76	78	67	69	51.52
2022-10-16 09:32:00	13.94	63	72	62	62	56	62.2	75	78	66	69	51.55
2022-10-16 09:34:00	14.05	63	72	62	62	56	62.18	75	77	66	68	51.94
2022-10-16 09:35:00	14.05	63	72	62	62	56	62.18	75	77	66	68	51.87
2022-10-16 09:36:00	14.18	63	72	62	62	56	62.17	75	77	66	68	51.78
2022-10-16 09:37:00	14.05	64	72	62	62	56	62.16	74	77	66	68	51.9
2022-10-16 09:39:00	14.01	64	72	62	62	56	62.15	75	77	66	69	51.97
2022-10-16 09:40:00	14	64	72	62	62	56	62.14	75	78	67	69	51.91
2022-10-16 09:41:00	14.06	64	72	62	62	56	62.13	75	78	67	70	51.86
2022-10-16 09:42:00	14.04	64	72	62	62	57	62.13	76	78	67	70	51.99
2022-10-16 09:44:00	13.91	64	72	62	62	56	62.12	76	79	67	70	51.83
2022-10-16 09:45:00	14.1	64	72	62	62	57	62.1	76	79	67	70	51.82
2022-10-16 09:46:00	13.98	64	72	62	62	56	62.1	76	78	67	69	51.9
2022-10-16 09:47:00	14.09	64	72	62	62	57	62.1	75	78	66	69	51.84
2022-10-16 09:49:00	13.98	64	72	62	62	56	62.09	75	77	66	68	51.81
2022-10-16 09:50:00	14.11	64	72	62	62	57	62.08	75	77	66	68	51.82
2022-10-16 09:51:00	14.01	64	72	62	62	56	62.08	75	77	66	68	51.85
2022-10-16 09:55:00	13.99	64	72	62	62	57	62.06	75	78	67	69	51.95
2022-10-16 09:57:00	14.15	64	72	63	62	56	62.05	77	79	67	70	51.85
2022-10-16 09:59:00	14.01	64	72	63	62	57	62.04	76	79	67	70	51.92
2022-10-16 10:00:00	14.09	64	72	63	63	57	62.03	76	78	67	69	51.94
2022-10-16 10:02:00	14	64	73	63	62	57	62.03	75	78	66	68	51.83
2022-10-16 10:03:00	14.18	64	73	63	63	57	62.02	75	77	66	68	52.04
2022-10-16 10:05:00	13.94	64	72	63	62	56	63.02	75	77	66	68	52.17
2022-10-16 10:06:00	13.99	64	72	63	63	57	62.01	75	77	66	68	52.03
2022-10-16 10:07:00	14.18	64	72	63	63	57	62.24	75	77	66	69	52.07
2022-10-16 10:09:00	14.11	64	72	62	63	57	63.24	75	78	67	69	52.07
2022-10-16 10:10:00	14.13	64	72	63	63	57	63.24	76	78	67	69	52.12
2022-10-16 10:11:00	14.04	64	72	63	63	57	62.23	76	79	67	70	51.96
2022-10-16 10:13:00	14.05	64	73	63	63	57	63.23	77	79	68	70	51.76
2022-10-16 10:14:00	14.14	64	72	63	63	57	62.23	76	79	67	70	51.88
2022-10-16 10:15:00	13.99	64	72	63	63	57	62.22	75	78	67	69	51.97
2022-10-16 10:17:00	14.16	64	72	63	63	57	63.22	75	77	66	68	52.13
2022-10-16 10:18:00	14.1	64	73	63	62	57	63.21	75	77	66	68	52.19
2022-10-16 10:20:00	13.94	64	73	63	62	57	63.21	75	77	66	68	52.18
2022-10-16 10:21:00	13.94	64	73	63	63	57	63.21	75	77	66	68	52.13
2022-10-16 10:22:00	14	64	73	63	63	57	63.21	75	78	66	69	52.05
2022-10-16 10:24:00	14.02	64	73	63	63	57	63.2	75	78	67	69	52.21
2022-10-16 10:25:00	14.14	64	73	63	63	57	63.2	76	79	67	70	52.03
2022-10-16 10:27:00	14.1	64	73	63	63	57	63.19	77	79	68	71	51.84
2022-10-16 10:28:00	14	64	72	63	63	57	63.19	76	79	67	70	51.76
2022-10-16 10:29:00	14.05	64	73	63	63	57	63.18	76	78	67	69	51.85
2022-10-16 10:31:00	14.01	64	73	63	63	57	63.19	75	78	66	69	52.02
2022-10-16 10:32:00	14.04	64	73	63	63	57	63.18	75	77	66	68	52.08
2022-10-16 10:33:00	14.19	64	73	63	63	57	63.18	75	77	66	68	52.06
2022-10-16 10:34:00	14.06	65	73	63	63	57	63.18	75	77	66	68	52.08
2022-10-16 10:36:00	14.06	64	73	63	63	57	63.18	75	77	66	69	52.05
2022-10-16 10:37:00	13.94	64	72	63	63	57	63.18	75	78	66	69	52.21
2022-10-16 10:38:00	14.04	65	73	63	63	57	63.16	75	78	67	69	52.09
2022-10-16 10:40:00	14.1	65	72	63	63	57	63.15	76	78	67	70	52.21
2022-10-16 10:41:00	14.02	65	73	63	63	57	63.16	77	79	68	70	52.06
2022-10-16 10:42:00	13.96	64	73	63	63	57	63.15	77	79	68	70	52.14
2022-10-16 10:43:00	14.23	65	73	63	63	57	63.15	76	79	67	70	52.2
2022-10-16 10:45:00	13.95	65	73	63	63	57	63.14	76	78	67	69	52.07
2022-10-16 10:46:00	14.15	65	73	63	63	57	63.14	75	78	66	69	52.18
2022-10-16 10:47:00	14.05	65	73	63	63	57	63.15	75	77	66	68	52.12
2022-10-16 10:49:00	14.23	65	73	63	63	57	63.13	75	77	66	68	52.04
2022-10-16 10:50:00	14.19	65	73	63	63	57	63.13	75	77	66	69	52.17
2022-10-16 10:52:00	14.06	65	73	63	63	57	63.12	75	78	66	69	52.24
2022-10-16 10:53:00	14.01	65	73	63	63	57	63.11	75	78	67	69	52.25
2022-10-16 10:54:00	14.07	65	73	63	63	57	63.1	76	78	67	69	52.03
2022-10-16 10:55:00	14.11	65	73	63	63	57	63.12	76	79	67	70	52.14
2022-10-16 10:56:00	14.18	65	73	63	63	57	63.11	77	79	68	70	52.01
2022-10-16 10:58:00	14.16	65	73	63	63	57	63.11	77	79	68	70	52.07
2022-10-16 10:59:00	14.14	65	73	63	63	57	63.1	76	78	67	69	52.12
2022-10-16 11:00:00	14.15	65	73	63	63	57	63.1	75	78	67	69	52
2022-10-16 11:02:00	14.02	65	73	63	63	57	63.09	75	77	66	68	52.2
2022-10-16 11:03:00	14.05	65	73	63	63	57	63.09	75	77	66	68	52.42
2022-10-16 11:05:00	14.09	65	73	63	63	57	63.09	75	77	66	69	52.44
2022-10-16 11:06:00	14.06	65	73	63	63	57	63.09	75	77	66	69	52.46
2022-10-16 11:07:00	14.1	65	73	63	63	57	63.08	75	78	67	69	52.42
2022-10-16 11:09:00	14.11	65	73	63	63	57	63.07	76	78	67	70	52.09
2022-10-16 11:10:00	14.2	65	73	63	63	57	63.07	77	79	68	70	52.22
2022-10-16 11:12:00	14.11	65	73	63	63	57	63.06	77	79	68	71	52.03
2022-10-16 11:13:00	14.14	65	73	63	63	57	63.06	77	79	67	70	52.21
2022-10-16 11:15:00	14.15	65	73	63	63	57	63.06	76	78	67	69	52.1
2022-10-16 11:16:00	14.09	65	73	63	63	57	63.06	75	78	66	69	52.11
2022-10-16 11:17:00	14.07	65	73	63	63	57	63.06	75	77	66	68	52.38
2022-10-16 11:19:00	14.15	65	73	63	63	57	63.04	75	77	66	68	52.39
2022-10-16 11:20:00	14.06	65	73	63	63	58	63.04	75	77	66	69	52.46
2022-10-16 11:21:00	14.09	65	73	63	63	58	63.04	75	78	66	69	52.31
2022-10-16 11:23:00	14.14	65	73	63	63	57	63.03	75	78	66	69	52.5
2022-10-16 11:24:00	14	65	73	63	63	57	63.04	76	78	67	70	52.47
2022-10-16 11:25:00	14.07	65	73	63	63	57	63.04	76	79	68	71	52.13
2022-10-16 11:27:00	14.13	65	73	63	63	57	63.03	77	79	68	71	52
2022-10-16 11:28:00	14.14	65	73	63	63	57	63.03	77	79	67	70	52.18
2022-10-16 11:29:00	14.11	65	73	63	63	57	63.02	76	78	67	69	52.01
2022-10-16 11:31:00	14.09	65	73	63	63	57	63.02	75	78	66	69	52.12
2022-10-16 11:32:00	14.15	65	73	63	63	57	63.03	75	77	66	68	52.39
2022-10-16 11:34:00	14.07	65	73	63	63	57	63.02	75	77	66	68	52.42
2022-10-16 11:35:00	14.16	65	73	63	63	57	63.01	75	77	66	69	52.26
2022-10-16 11:36:00	14.04	65	73	63	63	57	63.01	75	78	66	69	52.35
2022-10-16 11:38:00	14.23	65	73	63	63	57	63	75	78	67	69	52.38
2022-10-16 11:39:00	14.19	65	73	63	63	58	63.25	76	78	67	70	52.13
2022-10-16 11:41:00	14.07	65	74	63	63	58	63.01	77	79	68	71	52.08
2022-10-16 11:42:00	14.14	65	73	63	63	57	63.24	77	79	68	71	52.23
2022-10-16 11:44:00	14.09	65	73	63	63	57	63.24	77	79	68	70	52.23
2022-10-16 11:45:00	14.13	65	73	63	63	57	63.24	76	78	67	69	52.18
2022-10-16 11:46:00	14.16	65	73	63	63	57	63.24	75	78	66	69	52.21
2022-10-16 11:48:00	14.14	65	73	63	63	57	63.25	75	77	66	68	52.31
2022-10-16 11:49:00	14.02	65	73	63	63	58	63.24	75	77	66	68	52.4
2022-10-16 11:50:00	14.23	65	73	63	63	57	63.24	75	77	66	69	52.29
2022-10-16 11:52:00	14.13	65	73	63	63	57	63.24	75	78	66	69	52.42
2022-10-16 11:53:00	14.09	65	73	63	63	58	63.23	75	78	67	69	52.36
2022-10-16 11:55:00	14.16	65	73	63	63	57	63.23	76	78	67	70	52.5
2022-10-16 11:56:00	14	65	73	63	63	57	63.21	77	79	68	70	52.11
2022-10-16 11:58:00	14.04	65	73	63	63	57	63.22	77	79	68	70	52.21
2022-10-16 11:59:00	14.01	65	74	63	63	58	63.21	77	79	68	70	52.15
2022-10-16 12:00:00	14.11	65	73	63	63	57	63.21	76	78	67	69	52.15
2022-10-16 12:02:00	14.06	65	73	63	63	57	63.21	75	78	66	69	52.29
2022-10-16 12:03:00	14.14	65	74	63	63	58	63.2	75	77	66	68	52.39
2022-10-16 12:05:00	14.19	65	73	63	64	58	63.2	75	77	66	68	52.47
2022-10-16 12:06:00	14.07	65	73	64	63	57	63.19	75	77	66	68	52.36
2022-10-16 12:07:00	14.23	65	73	64	63	57	63.19	75	78	67	69	52.48
2022-10-16 12:09:00	14.18	65	73	63	63	57	63.18	75	78	67	69	52.4
2022-10-16 12:10:00	14.06	65	73	63	63	57	64.38	76	78	67	69	52.27
2022-10-16 12:12:00	14.06	65	74	64	63	57	64.36	77	79	67	70	52.48
2022-10-16 12:13:00	14.16	65	73	63	63	57	64.35	77	79	68	70	52.14
2022-10-16 12:14:00	14.2	65	73	63	63	57	63.17	77	79	67	70	52.19
2022-10-16 12:16:00	14.15	65	73	63	64	57	63.17	76	78	67	69	52.27
2022-10-16 12:17:00	14.15	65	74	63	64	58	63.17	75	78	67	69	52.33
2022-10-16 12:18:00	14.16	65	73	64	64	57	63.17	75	78	66	69	52.49
2022-10-16 12:20:00	14.11	65	73	63	63	57	63.17	75	77	66	69	52.3
2022-10-16 12:21:00	14.13	65	73	63	63	58	63.16	75	77	66	69	52.33
2022-10-16 12:23:00	14.14	65	73	63	63	58	63.17	75	78	66	69	52.37
2022-10-16 12:24:00	14.09	65	74	64	63	57	63.15	75	78	67	69	52.31
2022-10-16 12:25:00	14.15	65	73	64	64	58	63.15	75	78	67	69	52.4
2022-10-16 12:26:00	14.19	65	73	64	63	58	63.16	76	78	67	70	52.46
2022-10-16 12:28:00	14.15	65	73	63	64	57	64.3	76	79	67	70	52.29
2022-10-16 12:29:00	14.19	65	73	63	64	58	63.14	76	79	67	70	52.29
2022-10-16 12:30:00	14.16	65	73	64	63	58	63.14	76	78	67	70	52.34
2022-10-16 12:32:00	14.15	65	73	64	63	58	63.14	76	78	67	70	52.26
2022-10-16 12:33:00	14.24	65	73	64	64	58	63.13	76	78	67	69	52.29
2022-10-16 12:35:00	14.18	65	73	64	63	57	64.28	76	78	67	69	52.36
2022-10-16 12:36:00	14.18	65	73	64	64	58	64.28	75	78	67	69	52.46
2022-10-16 12:38:00	14.14	65	73	64	64	58	63.13	75	78	67	69	52.34
2022-10-16 12:39:00	14.2	65	74	64	64	58	63.13	75	78	66	69	52.27
2022-10-16 12:40:00	14.1	65	74	64	64	58	64.24	75	78	67	69	52.47
2022-10-16 12:42:00	14.2	65	74	64	63	57	63.13	75	78	67	69	52.47
2022-10-16 12:43:00	14.23	65	73	64	64	58	64.25	75	78	67	69	52.26
2022-10-16 12:45:00	14.13	65	73	64	64	58	63.12	75	78	67	69	52.31
2022-10-16 12:46:00	14.09	65	74	64	63	58	64.25	75	78	67	69	52.38
2022-10-16 12:47:00	14.15	65	73	63	64	57	64.24	76	78	67	69	52.44
2022-10-16 12:49:00	14.13	65	73	64	64	58	64.21	76	78	67	69	52.32
2022-10-16 12:50:00	14.15	65	74	64	64	58	64.24	76	78	67	69	52.34
2022-10-16 12:52:00	14.18	65	73	64	63	58	63.11	76	78	67	69	52.34
2022-10-16 12:53:00	14.09	65	74	64	63	58	63.11	76	78	67	69	52.36
2022-10-16 12:54:00	14.11	65	74	64	63	58	64.22	76	78	67	69	52.36
2022-10-16 12:56:00	14.11	65	74	64	64	58	63.11	76	78	67	69	52.36
2022-10-16 12:58:00	14.18	65	74	64	63	58	64.21	76	78	67	69	52.33
2022-10-16 13:00:00	14.07	65	73	64	64	58	63.1	75	78	67	69	52.29
2022-10-16 13:01:00	14.16	65	73	64	63	58	64.18	76	78	67	69	52.27
2022-10-16 13:03:00	14.16	65	74	64	64	58	63.09	76	78	67	69	52.26
2022-10-16 13:04:00	14.19	65	74	64	63	58	64.18	76	78	67	69	52.45
2022-10-16 13:05:00	14.19	65	73	64	63	58	63.1	75	78	67	69	52.36
2022-10-16 13:07:00	14.06	65	74	64	64	58	64.18	75	78	66	69	52.29
2022-10-16 13:08:00	14.16	65	73	64	63	58	64.19	75	78	67	69	52.28
2022-10-16 13:10:00	14.07	65	74	64	64	58	63.09	75	78	67	69	52.3
2022-10-16 13:11:00	14.26	65	73	64	64	58	64.17	76	78	67	69	52.37
2022-10-16 13:11:00	14.18	65	74	64	64	58	64.18	76	78	67	69	52.41
2022-10-16 13:12:00	14.19	65	73	64	64	58	63.08	76	78	67	69	52.47
2022-10-16 13:13:00	14.24	65	73	64	64	58	63.09	76	78	67	69	52.26
2022-10-16 13:14:00	14.07	65	74	64	64	58	63.08	76	78	67	69	52.31
2022-10-16 13:15:00	14.14	65	73	64	64	58	64.15	76	78	67	69	52.36
2022-10-16 13:17:00	14.16	65	74	64	64	58	64.17	76	78	67	69	52.38
2022-10-16 13:18:00	14.07	65	73	64	64	58	64.19	76	78	67	69	52.4
2022-10-16 13:19:00	14.14	65	73	64	64	58	64.16	76	78	67	69	52.41
2022-10-16 13:20:00	14.15	65	74	64	64	58	64.16	76	78	67	69	52.4
2022-10-16 13:21:00	14.29	65	73	64	64	58	64.16	76	78	67	69	52.37
2022-10-16 13:22:00	14.19	65	74	64	64	58	64.15	75	78	67	69	52.34
2022-10-16 13:23:00	14.13	65	74	64	64	58	64.13	75	78	67	69	52.29
2022-10-16 13:24:00	14.09	65	73	64	64	58	64.14	76	78	67	69	52.5
2022-10-16 13:26:00	14.14	65	74	64	64	58	63.06	75	78	66	69	52.46
2022-10-16 13:27:00	14.2	65	74	64	64	58	64.12	75	78	66	69	52.39
2022-10-16 13:28:00	14.1	65	74	64	64	58	64.13	75	78	66	69	52.38
2022-10-16 13:29:00	14.16	65	73	64	64	58	64.12	75	78	66	69	52.39
2022-10-16 13:30:00	14.11	65	74	64	64	58	64.13	76	78	67	69	52.42
2022-10-16 13:31:00	14.1	65	73	64	64	58	64.12	76	78	67	69	52.5
2022-10-16 13:32:00	14.02	66	74	64	64	58	64.13	76	78	67	69	52.3
2022-10-16 13:33:00	14.1	66	73	64	64	58	64.12	76	78	67	69	52.37
2022-10-16 13:34:00	14.29	65	74	64	64	58	64.12	76	78	67	69	52.4
2022-10-16 13:35:00	14.06	66	73	64	64	58	64.12	76	78	67	69	52.42
2022-10-16 13:37:00	14.3	65	73	64	64	58	64.11	76	78	67	69	52.43
2022-10-16 13:38:00	14.15	65	74	64	64	58	64.12	76	78	67	69	52.39
2022-10-16 13:39:00	14.13	65	74	64	64	58	64.1	76	78	67	69	52.34
2022-10-16 13:40:00	14.14	66	73	64	64	58	64.09	76	78	67	69	52.28
2022-10-16 13:41:00	14.13	66	74	64	64	58	64.08	75	78	66	69	52.45
2022-10-16 13:42:00	14.02	65	74	64	64	58	64.07	75	78	66	69	52.4
2022-10-16 13:43:00	14.15	65	74	64	64	58	64.08	75	78	66	69	52.32
2022-10-16 13:45:00	14.21	65	74	64	64	58	64.07	75	78	66	69	52.31
2022-10-16 13:46:00	14.06	66	74	64	64	58	64.05	75	78	66	69	52.34
2022-10-16 13:47:00	14.2	65	74	64	64	58	64.05	76	78	67	69	52.41
2022-10-16 13:48:00	14.16	65	74	64	64	58	64.06	76	78	67	69	52.49
2022-10-16 13:49:00	14.06	65	74	64	64	58	64.06	76	78	67	69	52.36
2022-10-16 13:50:00	14.09	65	74	64	64	58	64.06	76	78	67	69	52.43
2022-10-16 13:51:00	14.23	65	74	64	64	58	64.05	76	78	67	69	52.48
2022-10-16 13:52:00	14.13	65	73	64	64	58	64.03	76	78	67	69	52.28
2022-10-16 13:53:00	14.29	65	74	64	64	58	64.04	76	78	67	69	52.26
2022-10-16 13:54:00	14.16	65	73	64	64	58	64.04	76	78	67	70	52.48
2022-10-16 13:56:00	14.18	66	74	64	64	58	64.03	76	78	67	69	52.41
2022-10-16 13:57:00	14.16	66	74	64	64	58	64.02	76	78	67	69	52.36
2022-10-16 13:58:00	14.04	65	74	64	64	58	64.03	76	78	67	69	52.31
2022-10-16 13:59:00	14.13	66	74	64	64	58	64.02	75	78	66	69	52.44
2022-10-16 14:00:00	14.2	66	74	64	64	58	64.02	75	78	66	69	52.38
2022-10-16 14:01:00	14.3	65	74	64	64	58	64.02	75	78	66	69	52.35
2022-10-16 14:02:00	14.14	66	74	64	64	58	64.02	75	78	66	69	52.34
2022-10-16 14:03:00	14.07	66	74	64	64	58	64	75	78	66	69	52.33
2022-10-16 14:05:00	14.13	66	74	64	64	58	64.01	76	78	66	69	52.36
2022-10-16 14:06:00	14.13	66	74	64	64	58	64	75	78	66	69	52.38
2022-10-16 14:07:00	14.35	65	74	64	64	58	64	76	78	66	69	52.4
2022-10-16 14:08:00	14.04	66	74	64	64	58	64.5	76	78	66	69	52.39
2022-10-16 14:09:00	14.09	65	74	64	64	58	64.49	75	78	67	69	52.37
2022-10-16 14:10:00	14.18	66	74	64	64	58	64.47	75	78	67	69	52.35
2022-10-16 14:11:00	14.26	65	74	64	64	58	64.47	75	78	66	69	52.35
2022-10-16 14:13:00	14.15	65	74	64	64	58	64.48	75	78	67	69	52.36
2022-10-16 14:14:00	14.24	66	74	64	64	58	64.48	75	78	66	69	52.39
2022-10-16 14:15:00	14.21	65	74	64	64	58	64.48	76	78	67	69	52.43
2022-10-16 14:16:00	14.14	65	74	64	64	58	64.47	76	78	67	69	52.26
2022-10-16 14:17:00	14.31	65	74	64	64	58	64.48	76	78	67	69	52.32
2022-10-16 14:18:00	14.23	65	73	64	64	58	64.47	76	78	67	69	52.37
2022-10-16 14:20:00	14.06	65	74	64	64	58	64.45	76	78	67	69	52.4
2022-10-16 14:21:00	14.13	66	74	64	64	58	64.44	76	78	67	69	52.42
2022-10-16 14:22:00	14.2	66	74	64	64	58	64.46	76	78	67	69	52.44
2022-10-16 14:23:00	14.1	65	73	64	64	58	64.44	76	78	67	69	52.4
2022-10-16 14:24:00	14.14	65	74	64	64	58	64.47	75	78	67	69	52.34
2022-10-16 14:25:00	14.07	65	74	64	64	58	64.46	76	78	66	69	52.47
2022-10-16 14:26:00	14.16	65	74	64	64	58	64.47	75	78	66	69	52.41
2022-10-16 14:27:00	14.2	65	74	64	64	58	64.44	75	78	66	69	52.35
2022-10-16 14:28:00	14.26	65	74	64	64	58	64.44	75	78	66	69	52.29
2022-10-16 14:29:00	14.18	65	74	64	64	58	64.43	75	78	67	69	52.28
2022-10-16 14:31:00	14.18	65	74	64	64	58	64.44	75	78	66	69	52.31
2022-10-16 14:32:00	14.21	65	74	64	64	58	64.44	75	78	67	69	52.36
2022-10-16 14:33:00	14.19	65	74	64	64	58	63.22	76	78	66	69	52.44
2022-10-16 14:34:00	14.09	65	73	64	64	58	64.43	76	78	67	69	52.28
2022-10-16 14:35:00	14.24	65	74	64	64	58	64.43	76	78	67	69	52.4
2022-10-16 14:35:00	14	65	74	64	64	58	64.43	76	78	67	69	52.42
2022-10-16 14:36:00	14	65	74	64	64	58	64.42	76	78	67	69	52.44
2022-10-16 14:36:00	14.19	65	74	64	64	58	64.43	76	78	67	69	52.46
2022-10-16 14:37:00	14.16	65	73	64	64	58	64.43	76	78	67	69	52.46
2022-10-16 14:38:00	14.29	65	74	64	64	58	64.42	76	78	67	69	52.47
2022-10-16 14:39:00	14.13	65	74	64	64	58	64.41	76	78	67	69	52.47
2022-10-16 14:39:00	14.25	65	74	64	64	58	64.43	76	78	67	69	52.44
2022-10-16 14:40:00	14.1	65	74	64	64	58	64.43	76	78	67	69	52.43
2022-10-16 14:40:00	14.23	65	74	64	64	58	64.43	76	78	67	69	52.43
2022-10-16 14:41:00	14.14	65	74	64	64	58	64.43	76	78	67	70	52.41
2022-10-16 14:41:00	14.18	65	74	64	64	58	64.43	76	78	67	69	52.39
2022-10-16 14:42:00	14.05	65	74	64	64	58	64.41	76	78	67	70	52.37
2022-10-16 14:43:00	14.19	66	74	64	65	58	63.2	76	78	67	69	52.37
2022-10-16 14:43:00	14.24	65	73	64	64	58	64.42	76	78	67	69	52.36
2022-10-16 14:44:00	14.09	65	73	64	64	58	64.42	76	78	67	69	52.34
2022-10-16 14:45:00	14.11	65	74	64	64	58	64.39	75	78	67	69	52.34
2022-10-16 14:46:00	14.14	66	74	64	64	58	64.39	75	78	67	69	52.36
2022-10-16 14:47:00	14.24	65	74	64	64	58	64.4	75	78	67	69	52.36
2022-10-16 14:48:00	14.21	65	74	64	64	58	64.4	76	78	67	69	52.39
2022-10-16 14:49:00	14.18	65	74	64	64	58	64.4	76	78	67	69	52.39
2022-10-16 14:51:00	14.27	65	73	64	64	58	64.39	76	78	67	69	52.6
2022-10-16 14:52:00	14.06	65	74	64	64	58	64.4	75	78	67	69	52.53
2022-10-16 14:52:00	14.18	65	73	64	64	58	64.4	76	78	67	69	52.51
2022-10-16 14:53:00	14.16	65	74	64	64	58	64.39	75	78	67	69	52.75
2022-10-16 14:55:00	14.14	65	74	64	64	58	64.41	75	78	67	69	52.74
2022-10-16 14:56:00	14.05	65	74	64	64	58	64.41	76	78	67	69	52.74
2022-10-16 14:57:00	14.23	65	74	64	64	58	64.4	76	78	66	69	52.5
2022-10-16 14:58:00	14.16	65	73	64	64	58	64.4	76	78	67	69	52.53
2022-10-16 14:59:00	14.25	65	74	64	64	58	64.4	76	78	67	69	52.31
2022-10-16 15:00:00	14.3	65	73	64	64	58	64.4	76	78	67	69	52.33
2022-10-16 15:01:00	14.14	65	74	64	64	58	64.4	76	78	67	69	52.37
2022-10-16 15:03:00	14.2	65	73	64	64	58	64.4	76	78	67	69	52.37
2022-10-16 15:04:00	14.1	65	74	64	64	58	63.2	76	78	66	69	52.32
2022-10-16 15:05:00	14.23	65	74	64	64	58	64.4	76	78	66	69	52.26
2022-10-16 15:12:00	14.02	65	73	64	64	58	64.38	76	78	67	69	52.47
2022-10-16 15:13:00	14.34	65	73	64	64	58	64.4	76	78	67	69	52.47
2022-10-16 15:14:00	14.21	65	74	64	64	58	64.39	76	78	67	69	52.49
2022-10-16 15:15:00	14.21	65	74	64	64	58	64.39	76	78	67	69	52.5
2022-10-16 15:16:00	14.15	65	73	64	63	58	64.39	75	78	67	69	52.47
2022-10-16 15:17:00	14.24	65	74	64	64	58	64.37	75	78	66	69	52.47
2022-10-16 15:18:00	14.2	65	74	64	64	58	64.36	76	78	67	69	52.46
2022-10-16 15:19:00	14.19	65	74	64	64	58	64.37	76	78	67	69	52.46
2022-10-16 15:20:00	14.13	65	73	64	64	58	63.19	75	78	67	69	52.47
2022-10-16 15:22:00	14	65	74	64	63	58	63.19	76	78	67	69	52.48
2022-10-16 15:23:00	14.24	65	73	64	64	58	64.37	76	78	67	69	52.26
2022-10-16 15:24:00	14.23	65	74	64	64	58	64.4	76	78	67	69	52.28
2022-10-16 15:25:00	14.16	65	73	64	64	58	64.38	76	78	67	69	52.27
2022-10-16 15:26:00	14.27	65	73	64	64	58	63.19	76	78	66	69	52.5
2022-10-16 15:27:00	14.07	65	73	64	64	58	64.37	76	78	67	69	52.47
2022-10-16 15:28:00	14.1	65	73	64	64	58	64.36	75	78	66	69	52.43
2022-10-16 15:29:00	14.16	65	74	64	64	58	63.18	75	78	67	69	52.41
2022-10-16 15:30:00	14.2	65	73	64	64	58	63.18	75	78	66	69	52.41
2022-10-16 15:31:00	14.16	65	74	64	64	58	63.18	75	78	66	69	52.38
2022-10-16 15:33:00	14.29	65	74	64	64	58	64.36	75	78	66	69	52.35
2022-10-16 15:33:00	14.23	65	74	64	64	58	64.36	75	78	67	69	52.35
2022-10-16 15:35:00	14.21	65	74	64	64	58	64.34	75	78	67	69	52.36
2022-10-16 15:36:00	14.21	65	73	64	63	58	64.35	76	78	67	69	52.42
2022-10-16 15:37:00	14.24	65	74	64	64	58	63.18	76	78	67	69	52.46
2022-10-16 15:38:00	14.25	65	73	64	64	58	64.35	76	78	67	69	52.25
2022-10-16 15:39:00	14.07	65	74	64	63	58	64.36	76	78	67	69	52.3
2022-10-16 15:40:00	14.29	65	73	64	64	58	63.18	76	78	67	69	52.34
2022-10-16 15:41:00	14.16	65	73	64	64	58	63.17	76	78	67	69	52.35
2022-10-16 15:42:00	14.05	65	74	64	64	58	63.17	76	78	67	69	52.36
2022-10-16 15:44:00	14.23	65	73	64	64	58	63.17	76	78	67	69	52.37
2022-10-16 15:45:00	14.07	65	74	64	64	58	64.34	76	78	67	69	52.36
2022-10-16 15:46:00	14.13	65	73	64	63	58	64.34	76	78	67	69	52.35
2022-10-16 15:47:00	14.19	65	73	64	64	58	63.17	76	78	67	69	52.34
2022-10-16 15:48:00	14.06	65	74	64	64	58	63.17	76	78	67	70	52.35
2022-10-16 15:49:00	14.3	65	73	64	64	57	64.34	76	78	67	70	52.36
2022-10-16 15:50:00	14.07	65	73	64	64	58	63.17	76	78	67	69	52.37
2022-10-16 15:51:00	14.2	65	73	64	63	58	64.35	76	78	67	69	52.37
2022-10-16 15:52:00	14.13	65	74	64	64	58	63.17	76	78	67	69	52.36
2022-10-16 15:56:00	14.21	65	73	64	64	58	64.34	75	78	67	69	52.29
2022-10-16 15:58:00	14.23	65	74	64	64	58	63.16	76	78	67	69	52.45
2022-10-16 16:00:00	14.13	65	73	64	63	58	63.16	76	78	67	69	52.69
2022-10-16 16:01:00	14.23	65	74	63	63	57	63.17	76	78	67	69	52.47
2022-10-16 16:03:00	14.3	65	74	64	63	58	63.16	76	78	67	69	52.5
2022-10-16 16:04:00	14.09	65	73	64	64	57	63.16	76	78	67	69	52.26
2022-10-16 16:05:00	14.07	65	73	64	63	58	63.16	76	78	67	69	52.27
2022-10-16 16:06:00	14.26	65	73	63	64	58	63.17	76	78	67	69	52.28
2022-10-16 16:07:00	14.14	65	73	64	64	57	64.34	76	78	67	69	52.28
2022-10-16 16:08:00	14.18	65	73	64	64	58	63.16	75	78	67	69	52.28
2022-10-16 16:09:00	14.16	65	73	63	64	58	64.32	76	78	67	69	52.26
2022-10-16 16:11:00	14.18	65	73	64	63	58	63.16	76	78	67	69	52.49
2022-10-16 16:12:00	14.23	65	74	63	63	58	64.32	76	78	67	69	52.45
2022-10-16 16:13:00	14.23	65	73	64	64	58	63.16	76	78	66	69	52.4
2022-10-16 16:14:00	14.16	65	73	64	63	58	63.16	75	78	66	69	52.38
2022-10-16 16:15:00	14.15	65	73	64	63	58	63.16	75	78	67	69	52.39
2022-10-16 16:16:00	14.1	65	73	64	63	58	63.15	75	78	67	70	52.41
2022-10-16 16:17:00	14.15	65	73	64	64	57	64.31	76	78	67	69	52.44
2022-10-16 16:18:00	14.09	65	73	64	64	58	63.16	76	78	67	69	52.44
2022-10-16 16:20:00	14.1	65	73	64	63	57	63.15	76	78	67	69	52.41
2022-10-16 16:21:00	14.09	65	73	64	63	57	63.15	75	78	67	69	52.4
2022-10-16 16:22:00	14.23	65	73	63	63	57	63.16	75	78	67	69	52.38
2022-10-16 16:23:00	14.23	65	73	63	63	57	63.15	75	78	66	69	52.38
2022-10-16 16:24:00	14.23	65	73	63	64	57	63.15	76	78	67	69	52.41
2022-10-16 16:26:00	14.18	65	73	64	64	57	63.16	76	78	67	69	52.44
2022-10-16 16:27:00	14	65	73	64	63	58	64.31	76	78	67	69	52.48
2022-10-16 16:28:00	14.11	65	74	64	63	58	63.15	76	78	67	69	52.26
2022-10-16 16:29:00	14.23	65	74	64	64	58	64.31	76	78	67	69	52.3
2022-10-16 16:30:00	14.16	65	73	63	64	57	63.16	76	78	67	69	52.32
2022-10-16 16:31:00	14.23	65	73	63	64	58	63.16	76	78	67	69	52.33
2022-10-16 16:32:00	14.01	65	73	64	63	58	63.15	76	78	67	69	52.33
2022-10-16 16:33:00	14.11	65	73	63	63	58	64.31	76	78	67	69	52.32
2022-10-16 16:35:00	14.23	65	73	64	63	58	63.15	75	78	67	69	52.27
2022-10-16 16:36:00	14.1	65	73	63	63	58	63.15	76	78	67	69	52.48
2022-10-16 16:37:00	14.09	65	73	64	63	58	63.16	75	78	67	69	52.41
2022-10-16 16:38:00	14.15	65	73	63	63	57	63.15	75	78	67	69	52.36
2022-10-16 16:39:00	14.07	65	73	63	64	57	63.15	75	78	67	69	52.32
2022-10-16 16:40:00	14.26	65	73	63	64	58	63.15	75	78	67	69	52.28
2022-10-16 16:42:00	14.19	65	73	64	63	58	63.14	75	78	67	69	52.28
2022-10-16 16:43:00	14.16	65	74	63	64	58	63.14	75	78	67	69	52.3
2022-10-16 16:44:00	14.19	65	73	64	64	58	63.14	75	78	67	69	52.34
2022-10-16 16:45:00	14.19	65	73	63	64	57	63.14	75	78	67	69	52.38
2022-10-16 16:46:00	14.13	65	74	63	63	57	63.14	76	78	67	69	52.41
2022-10-16 16:47:00	14.13	65	73	64	63	58	63.14	76	78	67	69	52.44
2022-10-16 16:49:00	14.25	65	73	63	63	57	63.14	76	78	67	69	52.46
2022-10-16 16:50:00	14.13	65	73	64	64	58	63.14	75	78	67	69	52.47
2022-10-16 16:51:00	14.14	65	73	64	63	58	63.15	75	78	67	69	52.46
2022-10-16 16:52:00	14.19	65	74	63	63	58	63.14	76	78	67	69	52.47
2022-10-16 16:53:00	14.07	65	73	63	64	58	63.15	75	78	67	69	52.47
2022-10-16 16:54:00	14.13	65	73	63	64	57	63.14	76	78	67	69	52.46
2022-10-16 16:55:00	14.07	65	74	63	64	58	63.14	76	78	67	69	52.46
2022-10-16 16:56:00	14.21	65	73	64	64	58	63.14	76	78	67	69	52.47
2022-10-16 16:57:00	14.1	65	73	64	64	57	63.14	75	78	67	69	52.47
2022-10-16 16:58:00	14.25	65	73	64	64	57	63.14	76	78	67	69	52.49
2022-10-16 16:59:00	14.29	65	73	63	64	57	63.14	75	78	67	69	52.48
2022-10-16 17:00:00	14.16	65	74	64	63	58	63.14	75	78	67	69	52.26
2022-10-16 17:01:00	14.29	65	73	63	63	57	63.14	76	78	67	69	52.5
2022-10-16 17:02:00	14.23	65	73	63	64	58	63.14	76	78	67	69	52.26
2022-10-16 17:03:00	14.35	65	73	64	63	57	63.13	76	78	67	69	52.27
2022-10-16 17:04:00	14.1	65	73	63	64	57	63.14	76	78	67	69	52.28
2022-10-16 17:06:00	14.1	65	73	64	63	58	63.14	75	78	67	70	52.28
2022-10-16 17:07:00	14.29	65	73	64	63	58	63.14	76	78	67	69	52.28
2022-10-16 17:08:00	14.14	65	73	63	64	58	63.14	76	78	67	69	52.28
2022-10-16 17:09:00	14.2	65	73	63	64	57	63.14	76	78	67	69	52.25
2022-10-16 17:10:00	14.19	65	73	63	63	57	63.14	75	78	67	69	52.5
2022-10-16 17:11:00	14.21	65	73	64	64	57	63.14	75	78	67	69	52.48
2022-10-16 17:12:00	14.19	65	74	64	63	57	63.14	76	78	67	69	52.47
2022-10-16 17:13:00	14.13	65	73	63	64	58	63.13	76	78	67	69	52.48
2022-10-16 17:15:00	14.21	65	73	63	63	57	63.13	76	78	67	69	52.48
2022-10-16 17:16:00	14.27	65	73	63	63	57	64.27	76	78	67	69	52.48
2022-10-16 17:17:00	14.09	65	73	63	63	58	63.14	75	78	67	69	52.48
2022-10-16 17:18:00	14.18	65	73	64	63	58	63.13	76	78	67	69	52.49
2022-10-16 17:19:00	14.15	65	73	64	63	57	63.13	76	78	67	69	52.26
2022-10-16 17:21:00	14.15	65	73	63	63	58	63.13	75	78	67	69	52.27
2022-10-16 17:22:00	14.14	65	74	63	63	58	63.13	76	78	67	69	52.28
2022-10-16 17:23:00	14.26	65	73	63	64	58	63.12	76	78	67	69	52.29
2022-10-16 17:24:00	14.14	65	73	64	63	58	63.12	76	78	67	69	52.3
2022-10-16 17:25:00	14.14	65	74	63	63	58	63.12	75	78	67	69	52.29
2022-10-16 17:26:00	14.2	65	73	63	63	58	63.12	76	78	67	69	52.28
2022-10-16 17:27:00	14.09	65	74	63	63	58	63.12	76	78	67	69	52.26
2022-10-16 17:29:00	14.29	65	73	64	64	58	63.11	75	78	67	69	52.5
2022-10-16 17:30:00	14.13	65	73	64	63	58	63.11	76	78	67	69	52.49
2022-10-16 17:31:00	14.15	65	73	64	63	57	63.09	76	78	67	69	52.48
2022-10-16 17:32:00	14.27	65	73	64	64	58	63.1	76	78	67	69	52.48
2022-10-16 17:33:00	14.15	65	73	64	64	57	63.09	76	78	67	69	52.48
2022-10-16 17:34:00	14.21	65	73	64	64	58	63.09	75	78	67	69	52.48
2022-10-16 17:35:00	14.24	65	73	63	64	58	63.08	76	78	67	69	52.49
2022-10-16 17:36:00	14.21	65	73	64	63	57	63.08	76	78	67	69	52.49
2022-10-16 17:38:00	14.26	65	73	64	64	57	63.09	76	78	67	69	52.26
2022-10-16 17:39:00	14.27	65	74	64	63	58	63.08	76	78	67	69	52.27
2022-10-16 17:40:00	14.18	65	73	64	64	58	63.08	76	78	67	69	52.25
2022-10-16 17:41:00	14.3	65	73	63	63	57	63.09	75	78	67	70	52.48
2022-10-16 17:42:00	14.3	65	73	63	63	58	63.09	76	78	67	69	52.46
2022-10-16 17:43:00	14.19	65	73	64	63	57	63.09	76	78	67	69	52.46
2022-10-16 17:45:00	14.32	65	73	63	63	57	63.09	75	78	67	69	52.46
2022-10-16 17:46:00	14.19	65	73	63	63	58	63.09	76	78	67	69	52.46
2022-10-16 17:47:00	14.19	65	73	63	63	58	63.09	76	78	67	70	52.46
2022-10-16 17:48:00	14.25	65	73	63	63	57	63.09	76	78	67	70	52.26
2022-10-16 17:49:00	14.06	65	73	63	63	57	63.09	76	78	67	69	52.29
2022-10-16 17:50:00	14.15	65	73	63	63	58	63.09	76	78	67	69	52.32
2022-10-16 17:52:00	14.36	65	73	63	64	58	63.09	76	78	67	69	52.35
2022-10-16 17:53:00	14.18	65	73	63	63	58	63.09	76	78	67	70	52.35
2022-10-16 17:54:00	14.11	65	74	63	64	58	63.1	76	78	67	69	52.34
2022-10-16 17:55:00	14.15	65	73	64	64	58	63.09	76	78	67	69	52.28
2022-10-16 17:56:00	14.26	65	73	64	64	58	63.09	75	78	67	69	52.49
2022-10-16 17:57:00	14.29	65	73	63	64	58	63.09	75	78	67	69	52.45
2022-10-16 17:58:00	14.2	65	74	63	63	57	63.09	75	78	67	69	52.39
2022-10-16 17:59:00	14.3	65	73	63	63	57	63.09	75	78	66	69	52.36
2022-10-16 18:00:00	14.23	65	73	63	63	57	63.08	75	78	67	69	52.36
2022-10-16 18:02:00	14.06	65	73	63	63	58	63.09	75	78	67	69	52.39
2022-10-16 18:03:00	14.19	65	73	64	63	57	63.08	75	78	67	69	52.44
2022-10-16 18:04:00	14.21	65	73	63	63	57	63.08	76	78	67	69	52.48
2022-10-16 18:06:00	14.27	65	73	63	64	57	63.08	76	78	67	69	52.29
2022-10-16 18:07:00	14.16	65	73	63	63	57	63.07	76	78	67	69	52.32
2022-10-16 18:08:00	14.27	65	73	63	63	57	63.07	76	78	67	69	52.31
2022-10-16 18:09:00	14.24	65	73	63	64	57	63.07	75	78	67	69	52.28
2022-10-16 18:10:00	14.21	65	73	63	64	57	63.06	76	78	67	69	52.5
2022-10-16 18:11:00	14.11	65	73	63	63	58	63.08	76	78	67	69	52.43
2022-10-16 18:12:00	14.09	65	73	63	63	57	63.06	75	78	67	69	52.39
2022-10-16 18:14:00	14.2	65	73	63	64	57	63.05	75	78	67	69	52.4
2022-10-16 18:15:00	14.1	65	73	63	64	58	63.05	76	78	67	69	52.42
2022-10-16 18:16:00	14.13	65	73	63	63	57	63.04	76	78	67	69	52.43
2022-10-16 18:17:00	14.23	65	73	63	63	58	63.05	75	78	67	69	52.41
2022-10-16 18:18:00	14.18	65	73	63	63	57	63.06	75	78	67	69	52.37
2022-10-16 18:19:00	14.16	65	73	63	63	58	63.04	75	78	67	69	52.34
2022-10-16 18:21:00	14.07	65	73	63	63	57	63.05	75	78	67	69	52.33
2022-10-16 18:22:00	14.26	65	73	63	63	57	63.05	75	78	67	69	52.34
2022-10-16 18:23:00	14.02	65	73	63	63	57	63.05	76	78	67	69	52.36
2022-10-16 18:24:00	14.26	65	73	63	63	57	63.05	76	78	67	69	52.36
2022-10-16 18:25:00	14.1	65	73	63	63	57	63.05	75	78	67	69	52.38
2022-10-16 18:26:00	14.24	65	73	63	63	57	63.05	75	78	67	69	52.38
2022-10-16 18:28:00	14.15	65	73	63	63	57	63.04	76	78	67	69	52.38
2022-10-16 18:29:00	14.15	65	73	63	63	57	63.04	76	78	67	69	52.41
2022-10-16 18:30:00	14.02	65	73	63	63	57	63.04	76	78	67	69	52.43
2022-10-16 18:31:00	14.26	65	73	63	63	58	63.03	76	78	67	69	52.45
2022-10-16 18:32:00	14.11	65	73	63	63	58	63.03	76	78	67	69	52.48
2022-10-16 18:33:00	14.27	65	73	63	63	57	63.03	76	78	67	69	52.26
2022-10-16 18:35:00	14.13	65	73	63	63	57	63.03	76	78	67	69	52.5
2022-10-16 18:36:00	14.15	65	73	63	63	57	63.02	75	78	67	69	52.48
2022-10-16 18:37:00	14.25	65	73	63	63	57	63.02	75	78	67	69	52.46
2022-10-16 18:38:00	14.27	65	73	63	63	57	63.01	75	78	67	69	52.43
2022-10-16 18:39:00	14.3	65	73	63	63	57	63.02	76	78	67	69	52.42
2022-10-16 18:40:00	14.27	65	73	63	63	57	63.01	76	78	67	69	52.44
2022-10-16 18:41:00	14.19	65	73	63	63	57	63	76	78	67	70	52.49
2022-10-16 18:42:00	14.19	65	73	63	63	57	63.01	76	78	67	69	52.27
2022-10-16 18:44:00	14.31	65	73	63	63	57	63	76	78	67	69	52.27
2022-10-16 18:45:00	14.13	65	73	63	63	57	63.25	76	78	67	69	52.27
2022-10-16 18:46:00	14.07	65	73	63	63	57	63	75	78	67	69	52.49
2022-10-16 18:47:00	14.14	65	73	63	63	57	63.25	76	78	67	69	52.46
2022-10-16 18:49:00	14.1	65	73	63	63	57	63	76	78	67	69	52.43
2022-10-16 18:50:00	14.29	64	73	63	63	57	63.01	75	78	67	69	52.42
2022-10-16 18:51:00	14.23	65	73	63	63	57	63.25	76	78	67	69	52.43
2022-10-16 18:52:00	14.14	65	73	63	63	57	63.23	76	78	67	69	52.47
2022-10-16 18:53:00	14.19	65	73	63	63	57	63.25	76	78	67	69	52.27
2022-10-16 18:56:00	14.07	65	73	63	63	57	63.23	76	78	67	69	52.42
2022-10-16 18:57:00	14.2	65	73	63	63	57	63.23	76	78	67	70	52.44
2022-10-16 18:59:00	14.3	65	73	63	63	57	63.23	75	78	67	69	52.36
2022-10-16 19:01:00	14.18	64	73	63	63	57	63.22	75	78	67	69	52.45
2022-10-16 19:02:00	14.2	65	73	63	63	57	63.23	75	78	67	69	52.36
2022-10-16 19:03:00	14.18	65	73	63	63	57	63.22	75	78	67	69	52.27
2022-10-16 19:04:00	14.21	64	73	63	63	57	63.21	75	78	67	69	52.49
2022-10-16 19:05:00	14.3	65	73	63	63	57	63.21	75	78	67	69	52.49
2022-10-16 19:07:00	14.24	65	73	63	63	57	63.21	76	78	67	70	52.32
2022-10-16 19:08:00	14.25	65	73	63	63	57	63.21	76	78	67	70	52.43
2022-10-16 19:09:00	14.24	65	73	63	63	57	63.21	76	78	67	70	52.33
2022-10-16 19:10:00	14.13	64	73	63	63	57	63.21	76	78	67	70	52.31
2022-10-16 19:11:00	14.27	65	73	63	63	57	63.21	76	78	67	70	52.42
2022-10-16 19:12:00	14.25	64	73	63	63	57	63.21	76	78	67	70	52.46
2022-10-16 19:13:00	14.27	64	73	63	63	57	63.2	76	78	67	69	52.33
2022-10-16 19:14:00	14.09	65	73	63	63	57	63.21	76	78	67	69	52.42
2022-10-16 19:15:00	14.15	64	73	63	63	57	63.19	75	78	67	69	52.5
2022-10-16 19:17:00	14.18	64	73	63	63	57	63.2	75	78	67	69	52.29
2022-10-16 19:18:00	14.2	65	73	63	63	57	63.19	75	78	66	69	52.44
2022-10-16 19:19:00	14.25	64	73	63	63	57	63.2	75	78	67	69	52.38
2022-10-16 19:20:00	14.16	65	73	63	63	57	63.2	75	78	67	69	52.43
2022-10-16 19:21:00	14.11	65	73	63	63	57	63.2	76	78	67	69	52.36
2022-10-16 19:23:00	14.25	64	73	63	63	57	63.19	76	78	67	70	52.3
2022-10-16 19:24:00	14.3	64	73	63	63	57	63.2	76	79	67	70	52.27
2022-10-16 19:25:00	14.07	64	73	63	63	57	63.19	76	79	67	70	52.28
2022-10-16 19:26:00	14.13	64	72	63	63	57	63.19	76	79	67	70	52.33
2022-10-16 19:27:00	14.34	65	73	63	63	57	63.19	76	78	67	69	52.49
2022-10-16 19:28:00	14.16	64	73	63	63	57	63.18	75	78	67	69	52.41
2022-10-16 19:29:00	14.21	64	73	63	63	57	63.19	75	78	66	69	52.42
2022-10-16 19:31:00	14.26	64	73	63	63	57	63.17	75	78	66	69	52.38
2022-10-16 19:32:00	14.24	65	73	63	63	57	63.17	75	78	66	69	52.49
2022-10-16 19:33:00	14.23	64	73	63	63	57	63.17	75	77	66	69	52.41
2022-10-16 19:34:00	14.31	64	73	63	63	57	63.17	75	78	66	69	52.41
2022-10-16 19:35:00	14.13	64	73	63	63	57	63.17	76	78	67	69	52.4
2022-10-16 19:36:00	14.26	64	73	63	63	57	63.17	76	78	67	70	52.46
2022-10-16 19:38:00	14.18	64	73	63	63	57	63.16	77	79	68	71	52.35
2022-10-16 19:39:00	14.09	64	73	63	63	57	63.16	77	79	68	71	52.3
2022-10-16 19:40:00	14.1	64	73	63	63	57	63.16	77	79	68	71	52.48
2022-10-16 19:41:00	14.16	64	73	63	63	57	63.16	77	79	68	70	52.47
2022-10-16 19:41:00	14.3	64	73	63	63	57	63.15	76	78	67	69	52.49
2022-10-16 19:42:00	14.19	65	72	63	63	57	62.15	75	78	66	69	52.26
2022-10-16 19:43:00	14.1	64	73	63	63	57	63.16	75	77	66	68	52.43
2022-10-16 19:44:00	14.26	64	72	63	63	57	63.15	75	77	66	68	52.4
2022-10-16 19:45:00	14.21	64	72	63	63	57	63.14	75	77	65	68	52.25
2022-10-16 19:47:00	14.16	64	73	63	63	57	63.15	75	77	66	68	52.7
2022-10-16 19:48:00	14.14	64	73	63	63	57	62.15	75	77	66	69	52.65
2022-10-16 19:48:00	14.21	64	73	63	63	57	63.14	75	77	66	69	52.26
2022-10-16 19:49:00	14.1	64	73	63	63	57	63.14	75	78	66	69	52.35
2022-10-16 19:49:00	14.26	64	72	63	63	57	63.14	75	78	66	69	52.49
2022-10-16 19:51:00	14.11	64	73	63	63	57	63.14	75	78	67	70	52.29
2022-10-16 19:52:00	14.15	64	73	63	63	57	63.14	76	79	67	70	52.38
2022-10-16 19:53:00	14.23	65	73	63	63	57	63.13	77	79	68	71	52.03
2022-10-16 19:55:00	14.26	64	73	63	63	57	63.14	77	79	68	70	52.11
2022-10-16 19:56:00	14.15	64	73	63	63	57	63.13	76	79	67	70	52.12
2022-10-16 19:57:00	14.19	64	72	63	63	57	63.14	76	78	67	69	52.16
2022-10-16 19:59:00	14.24	64	73	63	63	57	63.12	75	77	66	68	52.01
2022-10-16 20:00:00	14.19	64	72	63	63	57	63.13	75	77	66	68	52.4
2022-10-16 20:01:00	14.19	64	73	63	62	57	63.13	75	77	66	68	52.31
2022-10-16 20:02:00	14.23	64	72	63	63	57	63.13	75	77	66	69	52.46
2022-10-16 20:04:00	14.16	64	72	63	62	57	63.12	75	77	66	69	52.26
2022-10-16 20:05:00	14.19	64	72	63	63	57	63.12	75	78	67	69	52.28
2022-10-16 20:07:00	14.04	64	72	63	63	57	62.12	76	78	67	70	52.2
2022-10-16 20:08:00	14.15	64	73	63	63	57	63.13	76	79	67	70	52.03
2022-10-16 20:08:00	14.27	64	72	63	63	57	63.13	77	79	68	70	52.23
2022-10-16 20:09:00	14.21	64	72	63	62	57	63.13	77	79	68	71	52.14
2022-10-16 20:10:00	14.18	64	72	63	63	57	63.13	77	79	68	70	52.08
2022-10-16 20:10:00	14.26	64	73	63	62	57	63.14	77	79	67	70	52.08
2022-10-16 20:11:00	14.11	64	73	63	63	57	63.14	76	79	67	70	52.02
2022-10-16 20:11:00	14.23	64	72	63	63	57	63.14	76	78	67	69	52.15
2022-10-16 20:12:00	14.35	64	72	63	63	57	62.14	75	78	67	69	52.05
2022-10-16 20:13:00	14.14	64	72	63	63	57	62.14	75	78	66	69	52.12
2022-10-16 20:13:00	14.1	64	72	63	63	57	63.12	75	78	66	69	52.18
2022-10-16 20:14:00	14.16	64	72	63	63	57	62.12	75	78	66	69	52
2022-10-16 20:15:00	14.21	64	73	63	62	57	62.12	75	77	66	69	52.38
2022-10-16 20:16:00	14.27	64	72	63	63	57	62.12	75	77	66	69	52.29
2022-10-16 20:16:00	14.15	64	73	63	63	57	63.12	75	77	66	69	52.48
2022-10-16 20:17:00	14.07	64	73	63	62	57	63.12	75	77	66	69	52.43
2022-10-16 20:17:00	14.11	64	72	63	63	57	63.12	75	77	66	69	52.4
2022-10-16 20:18:00	14.04	64	72	63	63	57	63.12	75	78	66	69	52.41
2022-10-16 20:19:00	14.1	64	73	63	63	57	63.11	75	78	66	69	52.26
2022-10-16 20:20:00	14.15	64	73	63	63	56	62.1	75	78	67	69	52.22
2022-10-16 20:20:00	14.23	64	73	63	62	57	63.1	76	78	67	70	52.09
2022-10-16 20:21:00	14.15	64	73	63	63	57	62.09	76	78	67	70	52.15
2022-10-16 20:22:00	14.09	64	73	63	63	57	63.09	76	79	67	70	52.1
2022-10-16 20:22:00	14.18	64	72	63	63	57	63.09	77	79	67	71	52.02
2022-10-16 20:23:00	14.1	64	72	63	62	57	63.09	77	79	68	71	52.16
2022-10-16 20:24:00	14.29	64	73	63	63	57	63.09	77	79	68	70	52.13
2022-10-16 20:25:00	14.07	64	73	63	63	57	63.09	77	79	67	70	52.16
2022-10-16 20:26:00	14.25	64	72	63	63	57	62.09	76	79	67	70	52.03
2022-10-16 20:26:00	14.13	64	73	63	63	57	63.08	76	79	67	69	52.11
2022-10-16 20:27:00	14.13	64	73	63	63	57	62.08	75	78	67	69	52.19
2022-10-16 20:27:00	14.25	64	72	63	63	57	63.08	75	78	66	69	52.24
2022-10-16 20:28:00	14.1	64	72	63	62	57	62.07	75	78	66	69	52.37
2022-10-16 20:29:00	14.21	64	72	63	63	57	63.07	75	78	66	69	52.45
2022-10-16 20:29:00	14.1	64	73	63	63	57	62.07	75	77	66	69	52.32
2022-10-16 20:30:00	14.25	64	73	63	63	57	62.08	75	77	66	69	52.45
2022-10-16 20:31:00	14.31	64	73	63	63	57	62.07	75	77	66	69	52.27
2022-10-16 20:31:00	14.13	64	72	63	62	57	63.07	75	77	66	69	52.43
2022-10-16 20:32:00	14.27	64	73	63	63	57	62.07	75	77	66	69	52.41
2022-10-16 20:33:00	14.1	64	73	63	62	57	63.07	75	77	66	69	52.42
2022-10-16 20:33:00	14.14	64	72	63	63	57	63.07	75	78	66	69	52.45
2022-10-16 20:34:00	14.16	64	73	63	63	57	63.07	75	78	66	69	52.25
2022-10-16 20:35:00	14.23	64	72	63	63	57	63.06	75	78	67	69	52.44
2022-10-16 20:35:00	14.16	64	72	63	62	57	63.06	76	78	67	69	52.33
2022-10-16 20:36:00	14.16	64	72	63	63	57	63.06	76	79	67	70	52.47
2022-10-16 20:36:00	14.23	64	73	63	63	57	62.06	76	79	67	70	52.15
2022-10-16 20:37:00	14.14	64	73	63	63	57	63.05	76	79	67	70	52.11
2022-10-16 20:38:00	14.23	64	73	63	63	57	62.05	77	79	68	71	52.02
2022-10-16 20:38:00	14.27	64	73	63	63	57	63.05	77	79	68	71	52.2
2022-10-16 20:39:00	14.15	64	72	63	63	57	62.05	77	79	68	70	52.21
2022-10-16 20:39:00	14.21	64	73	63	63	57	62.05	77	79	67	70	52.01
2022-10-16 20:40:00	14.19	64	72	63	63	57	62.05	76	79	67	69	52.13
2022-10-16 20:41:00	14.16	64	73	63	63	57	63.05	76	78	67	69	52.04
2022-10-16 20:42:00	14.19	64	72	63	62	57	62.05	75	78	66	69	52.32
2022-10-16 20:43:00	14.25	64	72	63	63	57	63.04	75	78	66	69	52.38
2022-10-16 20:43:00	14.11	64	72	63	63	57	63.04	75	77	66	68	52.45
2022-10-16 20:44:00	14.13	64	72	63	63	57	62.04	75	77	66	68	52.27
2022-10-16 20:45:00	14.15	64	72	63	63	57	63.03	75	77	66	68	52.5
2022-10-16 20:46:00	14.26	64	73	63	63	57	63.02	75	77	66	69	52.35
2022-10-16 20:46:00	14.2	64	73	63	63	57	62.02	75	77	66	69	52.3
2022-10-16 20:47:00	14.2	64	73	63	63	57	63.02	75	77	66	69	52.28
2022-10-16 20:47:00	14.24	64	73	63	63	57	63.02	75	77	66	69	52.3
2022-10-16 20:48:00	14.16	64	72	63	63	57	62.02	75	78	66	69	52.32
2022-10-16 20:49:00	14.21	64	72	63	63	57	62.02	75	78	67	69	52.49
2022-10-16 20:49:00	14.31	64	72	63	63	57	63.01	75	78	67	69	52.35
2022-10-16 20:50:00	14.29	64	72	63	63	57	62.01	75	78	67	70	52.25
2022-10-16 20:50:00	14.19	64	72	63	63	57	63.01	76	78	67	70	52.4
2022-10-16 20:51:00	14.24	64	73	63	62	57	63.01	76	79	67	70	52.36
2022-10-16 20:51:00	14.27	64	72	63	62	57	63.02	76	79	67	70	52.04
2022-10-16 20:52:00	14.19	64	73	63	63	57	62.01	77	79	68	71	52.24
2022-10-16 20:53:00	14.23	64	72	63	63	57	63.01	77	79	68	71	52.16
2022-10-16 20:53:00	14.14	64	73	63	63	57	63	77	79	68	71	52.08
2022-10-16 20:54:00	14.26	64	73	63	62	57	62	77	79	68	70	52.18
2022-10-16 20:54:00	14.3	64	73	63	63	57	63	77	79	67	70	52.2
2022-10-16 20:55:00	14.29	64	73	63	62	57	63.25	76	79	67	70	52.02
2022-10-16 20:56:00	14.23	64	73	63	62	57	63.25	75	78	66	69	52.13
2022-10-16 20:56:00	14.36	64	72	63	63	57	62.25	75	78	66	69	52.14
2022-10-16 20:57:00	14.24	64	72	63	63	57	63.24	75	78	66	68	52.42
2022-10-16 20:57:00	14.25	64	72	63	63	57	63.25	75	77	66	68	52.45
2022-10-16 20:58:00	14.21	64	73	63	63	57	62.24	75	77	66	68	52.26
2022-10-16 20:59:00	14.3	64	72	63	63	57	63.24	75	77	66	68	52.46
2022-10-16 21:00:00	14.09	64	73	63	63	56	62.24	75	77	66	69	52.43
2022-10-16 21:01:00	14.15	64	72	63	62	57	63.23	75	77	66	69	52.37
2022-10-16 21:02:00	14.29	64	72	63	63	57	63.24	75	78	66	69	52.43
2022-10-16 21:03:00	14.24	64	72	63	63	57	63.23	75	78	66	69	52.37
2022-10-16 21:04:00	14.2	64	72	63	63	57	62.23	75	78	67	70	52.38
2022-10-16 21:06:00	14.13	64	72	63	63	57	62.23	76	79	67	70	52.16
2022-10-16 21:07:00	14.24	64	73	63	62	57	63.22	76	79	67	70	52.2
2022-10-16 21:08:00	14.25	64	72	63	63	57	62.22	77	79	67	70	52.19
2022-10-16 21:09:00	14.23	64	72	63	63	57	62.22	76	79	67	70	52.19
2022-10-16 21:10:00	14.21	64	72	63	63	57	62.22	76	78	67	69	52.2
2022-10-16 21:11:00	14.24	64	72	63	63	57	62.23	75	78	66	69	52.15
2022-10-16 21:12:00	14.21	64	72	63	63	57	62.23	75	78	66	69	52.09
2022-10-16 21:13:00	14.27	64	72	63	63	57	62.22	75	77	66	69	52.1
2022-10-16 21:15:00	14.31	64	72	63	63	57	62.23	75	77	66	69	52.37
2022-10-16 21:16:00	14.15	64	72	63	62	56	62.23	75	77	66	69	52.32
2022-10-16 21:17:00	14.26	64	72	63	62	57	62.22	75	78	66	69	52.37
2022-10-16 21:18:00	14.19	64	72	63	63	57	62.22	75	78	67	70	52.18
2022-10-16 21:19:00	14.25	64	72	63	63	57	63.22	76	78	67	70	52.24
2022-10-16 21:20:00	14.26	64	72	63	63	56	62.22	77	79	68	70	52.06
2022-10-16 21:21:00	14.13	64	72	62	62	57	62.22	77	79	68	71	52.19
2022-10-16 21:22:00	14.21	64	72	63	63	57	62.22	77	79	68	70	52.17
2022-10-16 21:24:00	14.18	64	72	63	62	57	62.22	76	79	67	70	52.12
2022-10-16 21:25:00	14.23	64	73	63	62	57	62.21	76	78	67	69	52.15
2022-10-16 21:26:00	14.15	64	73	62	62	56	62.22	75	78	66	69	52.24
2022-10-16 21:27:00	14.19	64	72	63	62	57	62.22	75	77	66	69	52.38
2022-10-16 21:28:00	14.27	64	72	62	62	56	62.22	75	77	66	69	52.28
2022-10-16 21:29:00	14.24	64	72	63	62	57	62.22	75	77	66	69	52.4
2022-10-16 21:30:00	14.3	64	73	63	62	57	62.22	75	77	66	69	52.36
2022-10-16 21:31:00	14.29	64	72	63	63	56	62.22	75	78	66	69	52.43
2022-10-16 21:33:00	14.16	64	72	63	62	57	62.22	75	78	67	69	52.31
2022-10-16 21:34:00	14.2	64	72	62	62	56	62.22	76	78	67	70	52.28
2022-10-16 21:35:00	14.24	64	72	62	63	57	62.2	76	79	67	70	52.01
2022-10-16 21:36:00	14.23	64	72	62	63	57	62.2	77	79	68	71	52.17
2022-10-16 21:37:00	14.19	64	72	62	62	56	62.2	77	79	68	71	52.22
2022-10-16 21:38:00	14.3	64	72	62	62	56	62.22	77	79	68	70	52.06
2022-10-16 21:39:00	14.31	64	72	62	63	56	62.22	76	79	67	70	52.11
2022-10-16 21:40:00	14.2	64	72	62	62	57	62.2	75	78	67	69	52.19
2022-10-16 21:42:00	14.29	64	72	63	62	56	62.21	75	77	66	69	52.19
2022-10-16 21:43:00	14.35	64	72	63	63	57	62.22	75	77	66	68	52.31
2022-10-16 21:44:00	14.21	64	72	62	62	56	62.22	75	77	66	68	52.3
2022-10-16 21:45:00	14.19	64	73	63	62	56	62.22	75	77	66	69	52.36
2022-10-16 21:46:00	14.19	64	72	62	62	57	62.21	75	77	66	69	52.39
2022-10-16 21:47:00	14.24	64	72	62	62	56	62.21	75	78	66	69	52.29
2022-10-16 21:48:00	14.23	64	72	62	62	56	62.24	76	78	67	70	52.5
2022-10-16 21:50:00	14.24	64	72	63	63	57	62.01	76	79	67	70	52.16
2022-10-16 21:51:00	14.21	64	72	62	63	56	62.01	77	79	68	71	52.13
2022-10-16 21:52:00	14.2	64	72	62	62	56	62.03	77	79	68	71	52.17
2022-10-16 21:53:00	14.25	64	72	62	62	56	62.03	77	79	67	70	52.22
2022-10-16 21:54:00	14.23	64	72	62	62	56	62.04	76	78	67	69	52.23
2022-10-16 21:55:00	14.2	64	72	62	62	56	62.05	75	78	66	69	52.07
2022-10-16 21:58:00	14.3	64	72	62	62	56	62.06	75	77	66	68	52.32
2022-10-16 21:59:00	14.15	64	72	62	62	56	62.07	75	77	66	68	52.31
2022-10-16 22:00:00	14.07	64	72	62	62	56	62.06	75	77	66	69	52.28
2022-10-16 22:03:00	14.14	64	72	62	62	56	62.06	76	78	67	70	52.11
2022-10-16 22:04:00	14.14	64	72	62	62	56	62.07	76	78	67	70	52.02
2022-10-16 22:06:00	14.18	64	72	62	62	56	62.07	77	79	68	71	52.22
2022-10-16 22:07:00	14.21	64	72	62	62	56	62.08	77	79	67	70	52.14
2022-10-16 22:08:00	14.24	64	72	62	62	57	62.09	76	79	67	69	52.07
2022-10-16 22:09:00	14.18	64	72	62	63	56	62.08	76	78	67	69	52.02
2022-10-16 22:10:00	14.24	64	72	62	62	57	62.09	75	78	66	69	52.09
2022-10-16 22:11:00	14.23	64	72	62	62	56	62.08	75	77	66	68	52.21
2022-10-16 22:12:00	14.24	64	72	62	62	56	62.08	75	77	66	68	52.18
2022-10-16 22:13:00	14.2	64	72	62	62	56	62.09	75	77	66	68	52.21
2022-10-16 22:15:00	14.2	64	72	62	62	56	62.09	75	77	66	69	52.16
2022-10-16 22:16:00	14.1	64	72	62	62	56	62.09	75	78	66	69	52.24
2022-10-16 22:17:00	14.26	64	72	62	62	56	62.08	75	78	67	69	52.07
2022-10-16 22:18:00	14.06	64	72	62	62	56	62.09	76	78	67	69	52.13
2022-10-16 22:19:00	14.34	64	72	62	62	56	62.08	76	78	67	70	52.02
2022-10-16 22:20:00	14.13	63	72	62	62	56	62.08	77	79	68	71	52.13
2022-10-16 22:22:00	14.26	64	72	62	62	56	62.08	77	79	68	70	52.1
2022-10-16 22:23:00	14.2	64	72	62	62	56	62.08	76	79	67	69	52.18
2022-10-16 22:24:00	14.2	64	72	62	62	56	62.09	75	78	66	69	52.07
2022-10-16 22:25:00	14.18	64	72	62	62	56	62.09	75	77	66	68	52.12
2022-10-16 22:26:00	14.23	64	72	62	62	56	62.09	75	77	66	68	52.02
2022-10-16 22:27:00	14.24	64	72	62	62	56	62.09	75	77	66	68	52.16
2022-10-16 22:28:00	14.23	64	72	62	62	56	62.09	75	77	66	69	52.23
2022-10-16 22:30:00	14.3	64	72	62	62	56	62.09	75	77	66	69	52.04
2022-10-16 22:31:00	14.19	64	72	62	62	56	62.1	75	78	67	69	52
2022-10-16 22:33:00	14.25	64	72	62	62	56	62.1	76	78	67	70	52.21
2022-10-16 22:34:00	14.21	64	72	62	62	56	62.1	77	79	67	70	52.09
2022-10-16 22:35:00	14.24	64	72	62	62	56	62.1	77	79	68	71	52.21
2022-10-16 22:36:00	14.19	64	72	62	62	56	62.1	76	79	67	70	52.12
2022-10-16 22:38:00	14.29	64	72	62	62	56	62.09	75	78	66	69	52.19
2022-10-16 22:39:00	14.13	64	72	62	62	56	62.1	75	77	66	68	52.04
2022-10-16 22:41:00	14.19	64	72	62	62	56	62.09	75	77	66	68	52.04
2022-10-16 22:42:00	14.1	64	72	62	62	56	62.1	75	77	66	68	52.01
2022-10-16 22:43:00	14.24	64	72	62	62	56	62.1	75	77	66	68	52.16
2022-10-16 22:45:00	14.29	64	72	62	62	56	62.09	75	77	66	69	52.25
2022-10-16 22:46:00	14.35	64	72	62	62	56	62.09	75	78	67	69	52.08
2022-10-16 22:47:00	14.18	64	72	62	62	56	62.1	76	78	67	70	52.14
2022-10-16 22:49:00	14.16	64	72	62	62	56	62.1	77	79	67	70	52.12
2022-10-16 22:50:00	14.18	64	72	62	62	56	62.09	77	79	67	70	52.17
2022-10-16 22:51:00	14.26	64	72	62	62	57	62.08	76	79	67	69	52.18
2022-10-16 22:53:00	14.3	64	72	62	62	56	62.07	75	78	66	69	52.18
2022-10-16 22:54:00	14.06	64	72	62	62	56	62.05	75	77	66	68	52.12
2022-10-16 22:56:00	14.13	64	72	62	62	56	62.03	75	77	66	68	52.23
2022-10-16 22:57:00	14.23	63	72	62	62	56	62.07	75	77	66	68	52.06
2022-10-16 22:58:00	14.16	64	72	62	62	56	62.07	75	77	66	69	52.21
2022-10-16 22:59:00	14.19	64	72	62	62	56	62.07	75	78	66	69	52.16
2022-10-16 23:01:00	14.19	63	72	62	62	56	62.06	76	78	67	70	52.07
2022-10-16 23:02:00	14.3	64	72	62	62	56	62.04	76	79	67	70	52.12
2022-10-16 23:04:00	14.15	64	72	62	62	56	62.04	77	79	67	71	52
2022-10-16 23:05:00	14.2	63	72	62	62	56	62.03	77	79	67	70	52.07
2022-10-16 23:06:00	14.2	64	72	62	62	56	62.02	76	78	67	69	52.07
2022-10-16 23:08:00	14.07	64	72	62	62	56	62.25	75	78	66	69	52.2
2022-10-16 23:09:00	14.26	64	72	62	62	57	62.25	75	77	66	69	52.09
2022-10-16 23:10:00	14.29	64	72	62	62	56	62.24	75	77	66	68	52.2
2022-10-16 23:12:00	14.29	64	72	62	62	57	62.24	75	77	66	69	52.23
2022-10-16 23:13:00	14.19	64	72	62	63	56	62.23	75	77	66	69	52.24
2022-10-16 23:14:00	14.18	64	72	63	62	57	62.23	75	78	66	69	52.16
2022-10-16 23:16:00	14.27	64	72	63	62	57	62.22	76	78	67	70	52.06
2022-10-16 23:17:00	14.14	64	72	63	63	57	63.24	76	79	67	70	52.12
2022-10-16 23:18:00	14	64	73	63	63	57	63.24	77	79	68	70	52.15
2022-10-16 23:20:00	14.26	64	73	63	63	57	63.24	76	79	67	70	51.78
2022-10-16 23:21:00	14.26	65	73	63	63	57	63	75	78	66	69	52.05
2022-10-16 23:22:00	14.25	65	73	63	63	57	63.02	75	78	66	69	52.14
2022-10-16 23:23:00	14.3	65	73	63	63	57	63.02	75	77	66	68	52.02
2022-10-16 23:25:00	14.05	65	73	63	63	57	63.05	75	77	66	68	52.12
2022-10-16 23:26:00	14.19	65	73	64	63	57	63.05	75	77	66	69	52.17
2022-10-16 23:27:00	14.21	65	74	63	64	57	63.06	75	77	66	69	52.17
2022-10-16 23:28:00	14.29	65	73	64	64	58	63.06	75	78	66	69	52.16
2022-10-16 23:30:00	14.14	65	73	63	63	58	64.16	76	78	67	70	52.07
2022-10-16 23:32:00	14.25	65	73	64	64	58	63.1	76	79	67	70	52.12
2022-10-16 23:33:00	14.29	65	73	64	63	57	63.11	77	79	67	70	52.1
2022-10-16 23:34:00	14.1	65	73	64	64	58	63.13	76	78	67	69	52.15
2022-10-16 23:36:00	14.19	65	73	64	63	58	64.28	76	78	66	69	52.11
2022-10-16 23:37:00	14.29	65	73	64	64	58	64.3	75	77	66	68	52.05
2022-10-16 23:38:00	14.21	65	74	64	63	58	64.33	75	77	66	68	52.06
2022-10-16 23:40:00	14.1	65	74	64	64	58	63.19	75	77	66	68	52.02
2022-10-16 23:41:00	14.27	65	73	64	64	57	63.19	75	77	66	69	52.2
2022-10-16 23:43:00	14.09	65	73	63	63	57	63.21	75	78	66	69	52.16
2022-10-16 23:44:00	14.21	65	73	64	63	57	63.23	76	78	67	70	52.1
2022-10-16 23:46:00	14.14	65	73	63	64	58	63.24	76	79	67	70	52.15
2022-10-16 23:47:00	14.13	65	73	63	63	58	63.24	77	79	68	70	51.94
2022-10-16 23:48:00	14.14	65	73	63	63	57	63.01	76	79	67	70	51.77
2022-10-16 23:50:00	14.07	65	73	63	63	57	63.02	75	78	66	69	52.04
2022-10-16 23:51:00	14.1	65	73	63	63	57	63.04	75	77	66	68	52.17
2022-10-16 23:53:00	14.15	65	73	63	63	57	63.05	75	77	66	68	52.22
2022-10-16 23:54:00	14.23	65	73	63	63	57	63.06	75	77	66	68	52.21
2022-10-16 23:55:00	14.16	65	73	63	63	57	63.07	75	77	66	69	52.17
2022-10-16 23:57:00	14.07	65	73	63	63	57	63.09	75	77	66	69	52.06
2022-10-16 23:58:00	14.18	65	73	63	63	57	63.09	75	78	67	69	52.2
2022-10-16 23:59:00	14.14	64	73	63	63	57	63.12	76	78	67	70	52.01
2022-10-17 00:01:00	14.19	65	73	63	63	57	63.12	77	79	68	70	51.81
2022-10-17 00:02:00	14.26	64	72	63	63	57	63.12	77	79	67	70	51.96
2022-10-17 00:03:00	14.2	65	73	63	63	57	63.14	76	79	67	69	51.97
2022-10-17 00:04:00	14.25	64	73	63	63	57	63.15	75	78	66	69	52.19
2022-10-17 00:05:00	14.1	65	73	63	63	57	63.15	75	77	66	68	52.02
2022-10-17 00:07:00	14.18	64	73	63	63	57	63.17	75	77	66	68	52.02
2022-10-17 00:08:00	14.21	64	73	63	63	57	63.18	75	77	66	68	52.04
2022-10-17 00:09:00	14.15	64	73	63	63	57	63.19	75	77	66	68	52.11
2022-10-17 00:11:00	14.14	64	73	63	63	57	63.21	75	77	66	69	52.19
2022-10-17 00:12:00	14.07	64	73	63	63	57	62.22	75	78	66	69	52.13
2022-10-17 00:13:00	14.14	64	73	63	62	57	62.23	75	78	67	69	52.08
2022-10-17 00:14:00	14.16	64	73	63	63	57	63.24	76	79	67	70	51.93
2022-10-17 00:15:00	14.23	64	72	63	63	57	62.24	76	79	67	70	51.99
2022-10-17 00:16:00	14.13	64	73	63	63	57	62.01	76	79	67	70	51.96
2022-10-17 00:18:00	14.19	64	72	63	63	57	62.01	75	78	67	69	51.79
2022-10-17 00:19:00	14.21	64	72	63	62	57	62.02	75	78	66	69	51.91
2022-10-17 00:20:00	14.09	64	72	63	63	57	62.03	75	77	66	68	51.77
2022-10-17 00:21:00	14.24	64	73	63	63	56	62.03	74	77	66	68	52.02
2022-10-17 00:22:00	14.11	64	72	62	63	56	62.04	74	77	66	68	52.05
2022-10-17 00:23:00	14.21	64	72	63	63	56	62.05	74	77	66	68	52.15
2022-10-17 00:25:00	14.15	64	72	62	63	56	62.07	75	77	66	69	52.16
2022-10-17 00:26:00	14.14	64	72	62	62	56	62.07	75	77	66	69	52.07
2022-10-17 00:27:00	14.19	64	72	62	62	56	62.09	75	78	67	70	51.98
2022-10-17 00:28:00	14.19	64	72	62	62	56	62.08	76	79	67	70	51.82
2022-10-17 00:29:00	14.11	64	72	63	62	56	62.1	76	79	67	70	51.92
2022-10-17 00:31:00	14.09	64	72	62	62	56	62.1	76	79	67	70	51.97
2022-10-17 00:32:00	14.14	64	72	62	62	56	62.1	76	78	67	69	51.96
2022-10-17 00:33:00	14.09	64	72	62	62	56	62.11	75	78	67	69	51.86
2022-10-17 00:34:00	14.1	64	72	62	62	56	62.12	75	77	66	68	51.99
2022-10-17 00:35:00	14.09	64	72	62	62	56	62.12	75	77	66	68	52.13
2022-10-17 00:36:00	14.06	64	72	62	62	56	62.14	74	77	66	68	52.12
2022-10-17 00:38:00	14.07	64	72	62	62	56	62.15	74	77	66	68	52.16
2022-10-17 00:39:00	14.13	64	72	62	62	56	62.16	75	77	66	69	52.18
2022-10-17 00:40:00	14.01	64	72	62	62	56	62.16	75	77	66	69	52.11
2022-10-17 00:41:00	14.09	64	72	62	62	56	62.16	75	78	67	69	52.13
2022-10-17 00:43:00	14.06	64	72	62	62	56	62.17	76	78	67	70	51.93
2022-10-17 00:44:00	14.14	64	72	62	62	56	62.19	76	79	67	70	51.77
2022-10-17 00:45:00	14.19	64	72	62	62	56	62.19	76	79	67	70	51.75
2022-10-17 00:46:00	14.19	64	72	62	62	56	62.21	76	78	67	69	51.88
2022-10-17 00:47:00	14.16	64	72	62	62	56	62.2	75	78	66	69	51.76
2022-10-17 00:49:00	14.2	64	72	62	62	56	62.21	75	77	66	68	51.86
2022-10-17 00:50:00	14.07	64	72	62	62	57	62.22	74	77	66	68	52.16
2022-10-17 00:52:00	13.95	64	72	63	62	56	62.23	74	77	66	68	52.14
2022-10-17 00:53:00	14.01	64	72	62	62	57	62.24	75	77	66	68	52.1
2022-10-17 00:54:00	14.04	64	72	62	63	57	63.25	75	77	66	69	52.02
2022-10-17 00:55:00	14.07	64	73	63	63	56	63	75	78	67	69	51.78
2022-10-17 00:56:00	14.11	64	72	63	63	57	63.01	76	78	67	70	51.79
2022-10-17 00:58:00	14.07	64	73	63	63	57	63.01	76	79	67	70	51.93
2022-10-17 00:59:00	14.19	64	73	63	63	57	63.02	76	79	67	70	51.94
2022-10-17 01:00:00	14.16	64	73	63	63	57	63.03	76	78	67	69	51.93
2022-10-17 01:01:00	14.23	64	73	63	63	57	63.04	75	78	66	69	51.86
2022-10-17 01:03:00	13.94	65	73	63	63	57	63.05	75	77	66	68	51.98
2022-10-17 01:04:00	14.02	64	73	63	63	57	63.06	74	77	66	68	51.87
2022-10-17 01:05:00	14.09	65	73	63	63	57	63.06	74	77	66	68	52.01
2022-10-17 01:07:00	14.07	65	73	63	63	57	63.07	74	77	66	68	52.11
2022-10-17 01:08:00	14	65	73	64	64	58	63.07	75	77	66	69	52.17
2022-10-17 01:09:00	14.15	65	73	63	63	57	63.08	75	78	66	69	51.97
2022-10-17 01:10:00	14.01	65	73	64	64	58	63.08	75	78	67	69	51.75
2022-10-17 01:11:00	14.07	65	73	63	63	58	63.09	76	79	67	70	51.83
2022-10-17 01:13:00	14.02	65	73	63	63	57	63.1	76	79	67	70	51.97
2022-10-17 01:14:00	14.1	65	73	63	63	58	63.11	76	79	67	70	51.77
2022-10-17 01:15:00	14.14	65	73	63	63	57	63.1	75	78	67	69	51.88
2022-10-17 01:16:00	14.06	65	73	63	63	58	63.12	75	77	66	69	51.78
2022-10-17 01:18:00	14.13	65	73	63	63	57	63.13	75	77	66	68	51.97
2022-10-17 01:19:00	14.18	65	73	63	63	57	63.14	74	77	66	68	51.91
2022-10-17 01:20:00	13.94	65	73	63	63	57	63.14	74	77	66	68	52.14
2022-10-17 01:21:00	14.23	65	73	63	63	57	63.15	74	77	66	68	52.1
