# Supplementary material for: State monitoring and fault prediction of centrifugal compressors based on long short–term memory and principal component analysis (LSTM-PCA)
Source: PeerJ Comput Sci. 2024 Oct 21;10:e2433. doi: 10.7717/peerj-cs.2433 (PMC11623196; doi:10.7717/peerj-cs.2433)
Supplement: Supplemental Information 3 [file peerj-cs-10-2433-s003.xlsx]

## Sheet: Sheet1
2022-10-14 14:00:00	13.81	65	73	63	63	57	63.05	75	78	66	68	51.88
2022-10-14 14:00:00	13.84	65	73	63	63	57	63.05	75	77	66	68	51.97
2022-10-14 14:01:00	13.94	65	73	63	63	57	63.05	74	77	65	68	51.85
2022-10-14 14:02:00	13.96	65	73	63	63	57	63.06	74	77	65	68	51.94
2022-10-14 14:03:00	13.96	65	73	63	63	57	63.04	74	77	65	68	51.96
2022-10-14 14:03:00	14	65	73	63	63	57	63.04	74	77	65	68	51.81
2022-10-14 14:04:00	13.88	65	73	63	63	57	63.04	74	77	65	68	51.78
2022-10-14 14:05:00	13.81	65	73	63	63	57	63.04	74	77	65	68	51.77
2022-10-14 14:06:00	14	65	73	63	63	57	63.04	75	77	66	68	51.88
2022-10-14 14:07:00	13.9	65	73	63	63	57	63.03	75	78	66	69	51.96
2022-10-14 14:07:00	13.91	65	73	63	63	57	63.03	75	78	66	69	51.98
2022-10-14 14:08:00	13.91	65	73	63	63	57	63.03	75	78	67	69	51.91
2022-10-14 14:09:00	14.04	65	73	63	63	57	63.03	76	78	67	69	51.77
2022-10-14 14:10:00	14	65	73	63	63	57	63.02	76	79	67	70	51.92
2022-10-14 14:11:00	13.89	65	73	63	63	57	63.02	76	79	67	70	51.87
2022-10-14 14:11:00	13.81	65	73	63	63	57	63.03	76	79	67	70	51.84
2022-10-14 14:12:00	14.04	65	73	63	63	57	63.03	76	79	67	69	51.87
2022-10-14 14:13:00	13.81	65	73	63	63	57	63.02	76	78	67	69	51.75
2022-10-14 14:13:00	13.95	65	73	63	63	57	63.02	75	78	67	69	51.88
2022-10-14 14:14:00	13.98	65	73	63	63	57	63.02	75	78	66	68	51.77
2022-10-14 14:15:00	13.86	65	73	63	63	57	63.03	75	77	66	68	51.81
2022-10-14 14:16:00	13.91	65	73	63	63	57	63.02	75	77	66	68	51.96
2022-10-14 14:16:00	13.82	65	73	63	63	57	63.03	74	77	65	68	51.81
2022-10-14 14:17:00	14.01	65	73	63	63	57	63.03	74	77	65	68	51.8
2022-10-14 14:18:00	13.79	65	73	63	63	57	63.02	74	77	65	68	51.96
2022-10-14 14:19:00	13.86	65	73	63	63	57	63.02	74	77	65	68	51.84
2022-10-14 14:19:00	13.86	65	73	63	63	58	63.01	74	77	65	68	51.8
2022-10-14 14:20:00	13.84	65	73	63	63	57	63.02	75	77	66	68	51.82
2022-10-14 14:21:00	13.93	65	73	64	63	57	63	75	77	66	69	51.96
2022-10-14 14:22:00	13.9	65	73	63	63	57	63.25	75	78	66	69	51.83
2022-10-14 14:23:00	13.93	65	73	63	63	57	63	76	78	67	69	51.93
2022-10-14 14:24:00	13.9	65	73	63	63	57	63.25	76	79	67	70	51.82
2022-10-14 14:25:00	13.8	65	73	63	63	58	63	76	79	67	70	51.92
2022-10-14 14:26:00	13.93	65	73	63	63	58	63.25	76	79	67	70	51.88
2022-10-14 14:27:00	13.9	65	73	63	63	57	63.24	76	78	67	69	51.83
2022-10-14 14:28:00	13.99	65	73	64	63	57	63.24	75	78	66	69	51.79
2022-10-14 14:30:00	13.86	65	73	63	63	57	63.23	75	78	66	68	51.9
2022-10-14 14:31:00	13.88	65	73	63	63	58	63.24	75	77	66	68	51.87
2022-10-14 14:32:00	13.84	65	73	63	63	57	63.24	75	77	65	68	51.88
2022-10-14 14:33:00	13.84	65	73	63	63	57	63.23	74	77	66	68	52.22
2022-10-14 14:33:00	13.94	65	73	63	63	57	63.23	75	77	66	68	52.15
2022-10-14 14:34:00	13.69	65	73	63	63	58	63.23	75	77	66	68	51.91
2022-10-14 14:36:00	13.9	65	73	63	63	57	63.23	75	78	66	69	51.78
2022-10-14 14:36:00	13.94	65	73	63	63	58	63.23	75	78	66	69	52
2022-10-14 14:37:00	13.84	65	73	63	63	57	63.23	75	78	67	69	51.81
2022-10-14 14:38:00	13.9	65	73	63	63	57	63.22	76	78	67	70	51.95
2022-10-14 14:39:00	13.84	65	73	63	63	58	63.22	76	79	67	70	51.83
2022-10-14 14:40:00	13.81	65	73	63	63	58	63.22	76	79	67	70	51.88
2022-10-14 14:41:00	13.95	65	73	63	63	57	63.22	76	79	67	69	51.96
2022-10-14 14:42:00	13.88	65	73	63	63	57	63.22	75	78	67	69	51.8
2022-10-14 14:43:00	13.9	65	73	63	63	57	64.43	75	78	66	68	51.95
2022-10-14 14:44:00	13.81	65	73	63	64	57	64.44	75	77	66	68	51.77
2022-10-14 14:45:00	13.88	65	73	64	63	58	63.21	74	77	65	68	52.16
2022-10-14 14:46:00	13.89	65	73	63	63	58	63.21	74	77	65	68	52.13
2022-10-14 14:48:00	13.95	65	73	64	63	57	63.2	74	77	65	68	52.16
2022-10-14 14:49:00	13.95	65	73	64	63	57	63.2	75	77	65	68	52.11
2022-10-14 14:49:00	13.82	65	73	63	63	58	63.2	75	77	66	68	52.15
2022-10-14 14:50:00	14.05	65	74	63	63	57	63.2	75	78	66	69	51.8
2022-10-14 14:51:00	13.98	65	73	64	64	57	63.2	75	78	66	69	51.79
2022-10-14 14:52:00	13.89	65	73	64	63	57	63.19	75	78	67	69	51.87
2022-10-14 14:54:00	13.93	65	73	64	63	58	63.19	76	79	67	70	51.77
2022-10-14 14:55:00	13.95	65	73	64	63	58	63.19	76	79	67	70	51.9
2022-10-14 14:56:00	13.96	65	73	64	63	58	64.38	76	79	67	70	51.98
2022-10-14 14:57:00	13.85	65	73	63	63	57	63.19	76	78	67	69	51.89
2022-10-14 14:58:00	13.96	65	74	64	63	57	64.38	75	78	67	69	51.85
2022-10-14 14:59:00	14.04	65	73	63	63	57	64.38	75	78	66	68	51.94
2022-10-14 15:00:00	13.9	65	73	64	63	58	63.19	75	77	66	68	52.04
2022-10-14 15:01:00	13.99	65	73	64	63	58	64.37	75	77	65	68	52.22
2022-10-14 15:02:00	13.94	65	73	63	64	58	63.19	74	77	65	68	52.24
2022-10-14 15:03:00	13.88	65	73	64	64	58	63.18	74	77	66	68	52.11
2022-10-14 15:04:00	13.81	65	73	63	64	57	63.18	75	77	66	68	52.08
2022-10-14 15:05:00	13.96	65	73	63	64	58	63.18	75	78	66	69	52.15
2022-10-14 15:06:00	13.94	65	73	64	64	58	64.35	75	78	66	69	52.06
2022-10-14 15:07:00	13.9	65	73	64	63	57	64.33	75	78	66	69	51.84
2022-10-14 15:08:00	13.91	65	73	64	63	58	63.17	76	78	67	69	51.93
2022-10-14 15:09:00	13.94	65	73	63	64	58	63.17	76	79	67	70	51.84
2022-10-14 15:10:00	14	65	73	64	63	58	63.17	76	79	67	70	51.87
2022-10-14 15:11:00	13.98	65	73	64	64	58	63.17	76	79	67	70	51.98
2022-10-14 15:12:00	13.89	65	74	64	63	57	63.17	76	78	67	69	51.86
2022-10-14 15:13:00	13.95	65	73	64	64	58	64.34	75	78	66	69	51.79
2022-10-14 15:14:00	13.91	65	73	64	63	57	63.16	75	78	66	68	52.13
2022-10-14 15:15:00	13.85	65	73	64	63	58	63.16	74	77	65	68	52.21
2022-10-14 15:16:00	13.89	65	73	63	64	58	63.16	74	77	65	68	52.13
2022-10-14 15:17:00	13.79	65	73	64	64	58	63.15	74	77	65	68	52.06
2022-10-14 15:18:00	13.89	65	73	64	64	58	64.3	74	77	65	68	52.23
2022-10-14 15:19:00	13.86	65	73	64	64	58	63.14	75	77	66	68	52.25
2022-10-14 15:20:00	13.93	65	73	64	64	58	63.15	75	78	66	69	52.14
2022-10-14 15:21:00	13.85	65	73	63	64	58	63.15	75	78	66	69	52.15
2022-10-14 15:22:00	13.99	65	73	64	64	57	63.14	75	78	67	69	51.99
2022-10-14 15:23:00	13.9	65	73	64	64	58	64.28	76	79	67	70	51.91
2022-10-14 15:24:00	13.93	65	73	63	64	58	63.15	76	79	67	70	51.82
2022-10-14 15:25:00	14.05	65	73	64	63	58	63.15	76	79	67	70	51.89
2022-10-14 15:26:00	13.8	65	73	64	63	58	64.31	76	79	67	70	51.98
2022-10-14 15:27:00	13.9	65	74	63	63	58	63.14	75	78	66	69	51.91
2022-10-14 15:28:00	13.96	65	73	64	64	57	64.28	75	78	66	68	51.99
2022-10-14 15:29:00	13.96	65	73	64	64	58	63.14	75	77	66	68	52.07
2022-10-14 15:30:00	13.94	65	73	64	64	58	64.28	74	77	65	68	52.19
2022-10-14 15:31:00	13.98	65	74	64	64	58	63.13	74	77	65	68	52.19
2022-10-14 15:32:00	13.9	65	74	64	64	58	64.27	74	77	66	68	52
2022-10-14 15:33:00	13.93	65	74	64	64	57	64.24	74	77	66	68	52.02
2022-10-14 15:34:00	13.84	65	74	63	64	58	64.26	75	77	66	69	52.13
2022-10-14 15:35:00	13.94	65	73	64	64	58	63.12	75	78	66	69	52.09
2022-10-14 15:36:00	13.81	65	73	64	64	58	64.24	75	78	67	69	51.89
2022-10-14 15:37:00	13.85	65	73	64	64	58	63.11	76	78	67	70	51.78
2022-10-14 15:38:00	13.94	65	73	64	64	58	64.24	76	79	67	70	51.95
2022-10-14 15:39:00	13.98	65	74	64	64	58	64.24	76	79	67	70	51.8
2022-10-14 15:40:00	14	65	74	64	63	58	63.11	76	79	67	70	51.97
2022-10-14 15:41:00	13.95	65	73	64	64	58	63.11	76	78	67	69	51.88
2022-10-14 15:42:00	13.91	65	73	64	63	58	63.1	75	78	66	69	51.82
2022-10-14 15:43:00	13.98	65	73	63	64	58	64.21	75	78	66	68	51.91
2022-10-14 15:44:00	13.85	65	73	64	63	58	63.1	74	77	66	68	52.24
2022-10-14 15:45:00	13.95	65	73	64	64	58	63.1	74	77	65	68	52.14
2022-10-14 15:46:00	13.98	65	73	64	64	58	64.19	74	77	65	68	52.17
2022-10-14 15:47:00	13.89	65	74	64	64	58	64.19	74	77	66	68	52.03
2022-10-14 15:48:00	13.89	65	73	64	64	58	64.17	75	77	66	68	52
2022-10-14 15:49:00	13.98	65	73	64	64	58	64.17	75	77	66	69	52.09
2022-10-14 15:50:00	13.85	65	74	64	64	58	64.19	75	78	66	69	52.15
2022-10-14 15:51:00	13.89	65	73	64	64	58	63.08	76	78	67	69	51.98
2022-10-14 15:52:00	13.9	65	74	64	64	58	64.17	76	78	67	70	51.88
2022-10-14 15:54:00	14.11	65	74	64	63	58	64.18	76	79	67	70	51.81
2022-10-14 15:55:00	13.77	65	74	64	64	58	63.08	76	79	67	70	51.98
2022-10-14 15:56:00	13.8	65	73	64	64	58	64.13	76	79	67	69	51.96
2022-10-14 15:57:00	13.96	65	73	64	64	58	64.13	75	78	66	69	51.99
2022-10-14 15:58:00	13.93	65	74	64	64	58	64.13	75	77	66	68	51.81
2022-10-14 15:59:00	14.11	65	74	64	64	58	64.14	74	77	65	68	52.13
2022-10-14 16:00:00	13.89	65	73	64	63	58	64.13	74	77	65	68	52.17
2022-10-14 16:01:00	13.88	65	73	64	64	58	64.12	74	77	66	68	52.03
2022-10-14 16:03:00	13.84	65	73	64	64	58	64.12	74	77	66	68	52.22
2022-10-14 16:04:00	14.01	65	73	64	64	58	64.1	75	77	66	69	52.1
2022-10-14 16:05:00	13.9	65	73	64	64	58	64.09	75	78	66	69	52.07
2022-10-14 16:06:00	13.9	65	74	64	64	58	64.09	75	78	67	69	51.87
2022-10-14 16:07:00	13.93	65	73	64	64	58	64.1	76	78	67	70	51.98
2022-10-14 16:09:00	13.93	65	74	64	64	58	64.08	76	79	67	70	51.9
2022-10-14 16:10:00	13.77	65	74	64	64	58	64.09	76	79	67	70	51.99
2022-10-14 16:11:00	13.98	65	73	64	63	58	64.08	76	78	67	69	51.93
2022-10-14 16:12:00	13.85	65	73	64	64	58	64.06	75	78	67	69	51.86
2022-10-14 16:13:00	13.9	65	73	64	64	58	64.06	75	77	66	68	52.23
2022-10-14 16:14:00	14.05	65	74	64	63	58	64.06	74	77	66	68	52.08
2022-10-14 16:15:00	14.05	65	73	64	64	58	64.06	74	77	65	68	52.25
2022-10-14 16:16:00	13.88	65	73	64	63	58	64.06	74	77	65	68	52.01
2022-10-14 16:18:00	13.94	65	73	64	63	58	64.04	74	77	66	68	52.21
2022-10-14 16:19:00	13.94	65	74	64	64	58	64.04	75	77	66	69	52.04
2022-10-14 16:20:00	14.01	65	73	64	64	58	64.02	75	78	66	69	52.08
2022-10-14 16:21:00	13.91	65	74	64	64	58	64.02	75	78	67	69	51.9
2022-10-14 16:22:00	13.93	65	73	64	64	58	64.02	76	78	67	70	51.98
2022-10-14 16:23:00	14.05	65	73	64	64	58	64.5	76	79	67	70	51.84
2022-10-14 16:26:00	13.82	65	73	64	64	58	64.5	76	78	67	69	51.95
2022-10-14 16:27:00	14.02	65	73	64	64	58	64.49	75	78	66	68	51.96
2022-10-14 16:29:00	13.9	65	73	64	64	58	64.49	75	77	66	68	52.19
2022-10-14 16:30:00	13.88	65	74	64	64	58	64.49	74	77	66	68	52.2
2022-10-14 16:31:00	13.91	65	74	64	64	58	64.49	74	77	66	68	52.02
2022-10-14 16:32:00	13.98	65	73	64	64	58	64.49	75	77	66	68	52.16
2022-10-14 16:33:00	13.89	65	74	64	64	58	64.47	75	77	66	69	52.23
2022-10-14 16:35:00	14.05	65	74	64	64	58	64.47	75	78	66	69	52.14
2022-10-14 16:36:00	13.96	65	73	64	64	58	64.45	75	78	67	69	51.77
2022-10-14 16:37:00	13.79	65	74	64	64	58	64.44	76	79	67	70	51.83
2022-10-14 16:39:00	13.93	65	73	64	64	58	64.45	76	79	67	70	51.94
2022-10-14 16:39:00	13.94	65	74	64	64	58	64.44	76	79	67	70	51.92
2022-10-14 16:40:00	14	65	74	64	64	58	64.45	76	78	67	70	51.94
2022-10-14 16:41:00	13.88	65	73	64	64	58	64.44	76	78	67	69	51.85
2022-10-14 16:41:00	13.94	65	74	64	64	58	64.44	75	78	67	69	51.98
2022-10-14 16:42:00	14	65	73	64	64	58	64.46	75	78	67	69	51.8
2022-10-14 16:42:00	14	65	73	64	64	58	64.44	75	78	66	69	51.84
2022-10-14 16:43:00	13.91	65	73	64	64	58	64.43	75	78	66	68	52.15
2022-10-14 16:43:00	13.98	65	73	64	64	58	64.44	75	77	66	68	52.03
2022-10-14 16:45:00	13.98	65	74	64	64	58	64.44	74	77	66	68	52.23
2022-10-14 16:45:00	14.04	65	73	64	64	58	64.44	74	77	65	68	52.12
2022-10-14 16:46:00	13.98	65	74	64	64	58	64.46	74	77	66	68	52.03
2022-10-14 16:46:00	13.91	65	74	64	64	58	64.45	74	77	66	68	52.2
2022-10-14 16:47:00	13.89	65	73	64	64	58	64.44	75	77	66	68	52.15
2022-10-14 16:47:00	13.82	65	74	64	64	58	64.43	75	77	66	68	52.13
2022-10-14 16:48:00	13.94	66	73	64	64	58	64.43	75	77	66	69	52.15
2022-10-14 16:49:00	13.95	65	74	64	64	58	64.43	75	78	66	69	52.02
2022-10-14 16:50:00	13.99	65	74	64	64	58	64.43	75	78	67	69	52.13
2022-10-14 16:51:00	14.05	65	74	64	64	58	64.42	75	78	67	70	52.04
2022-10-14 16:51:00	13.9	65	73	64	64	58	64.41	76	78	67	70	52.21
2022-10-14 16:52:00	13.94	65	73	64	64	58	64.41	76	78	67	70	51.92
2022-10-14 16:53:00	13.89	65	74	64	64	58	64.44	76	79	67	70	51.83
2022-10-14 16:54:00	13.9	65	73	64	64	58	64.44	76	79	67	70	51.9
2022-10-14 16:54:00	14	65	73	64	64	58	64.43	76	79	67	70	51.99
2022-10-14 16:55:00	13.91	65	74	64	64	58	64.42	76	79	67	70	51.98
2022-10-14 16:56:00	14	65	74	64	64	58	64.42	76	78	67	69	51.89
2022-10-14 16:56:00	14.01	65	73	64	64	58	64.43	76	78	67	69	51.99
2022-10-14 16:57:00	13.89	65	74	64	64	58	64.43	75	78	66	69	52.06
2022-10-14 16:57:00	13.9	65	73	64	64	58	64.43	75	78	66	69	52.09
2022-10-14 16:58:00	13.94	65	74	64	64	58	64.44	75	77	66	68	52.16
2022-10-14 16:59:00	13.98	65	73	64	64	58	64.43	74	77	66	68	52.18
2022-10-14 16:59:00	13.82	65	74	64	64	58	64.44	74	77	66	68	52.02
2022-10-14 17:00:00	13.86	65	74	64	64	58	64.43	74	77	66	68	52.24
2022-10-14 17:01:00	13.99	65	74	64	64	58	64.42	74	77	66	68	52.07
2022-10-14 17:01:00	14.04	65	74	64	64	58	64.43	74	77	65	68	52.02
2022-10-14 17:02:00	13.91	65	73	64	64	58	64.44	75	77	66	68	52.25
2022-10-14 17:03:00	13.91	65	74	64	64	58	64.43	75	77	66	69	52.05
2022-10-14 17:03:00	13.94	65	74	64	64	58	64.44	75	77	66	69	52.08
2022-10-14 17:04:00	14.02	65	74	64	64	58	64.44	75	78	66	69	52.18
2022-10-14 17:05:00	13.93	65	74	64	64	58	64.44	75	78	67	69	52.08
2022-10-14 17:06:00	13.9	65	73	64	64	58	64.44	75	78	67	69	52.02
2022-10-14 17:06:00	13.84	65	73	64	64	58	64.44	76	78	67	70	52.2
2022-10-14 17:07:00	13.9	65	73	64	64	58	64.43	76	79	67	70	51.93
2022-10-14 17:08:00	13.96	65	74	64	64	58	64.43	76	79	67	70	51.85
2022-10-14 17:08:00	13.95	65	73	64	64	58	64.43	76	79	67	70	51.78
2022-10-14 17:09:00	13.93	65	73	64	64	58	64.44	76	79	67	70	51.9
2022-10-14 17:10:00	13.89	65	74	64	64	58	64.43	76	79	67	70	51.98
2022-10-14 17:11:00	13.91	65	73	64	64	58	64.44	75	78	67	69	51.88
2022-10-14 17:12:00	13.96	65	74	64	64	58	64.44	75	78	66	69	51.94
2022-10-14 17:12:00	13.98	65	74	64	64	58	64.43	75	78	66	68	52.21
2022-10-14 17:13:00	13.94	65	73	64	64	58	64.43	74	77	66	68	52.06
2022-10-14 17:14:00	13.93	65	74	64	64	58	64.44	74	77	65	68	52.16
2022-10-14 17:15:00	13.88	65	73	64	64	58	64.43	74	77	65	68	52.01
2022-10-14 17:15:00	14.02	65	74	64	64	58	64.43	74	77	65	68	52.06
2022-10-14 17:16:00	13.9	65	73	64	64	58	64.43	74	77	66	68	52
2022-10-14 17:17:00	13.84	65	73	64	64	58	64.43	74	77	66	68	52.21
2022-10-14 17:18:00	13.99	65	73	64	64	58	64.44	75	77	66	68	52.23
2022-10-14 17:18:00	13.93	65	73	64	64	58	64.43	75	77	66	69	52.11
2022-10-14 17:19:00	13.93	66	73	64	64	58	64.43	75	78	66	69	52.21
2022-10-14 17:20:00	13.98	65	74	64	64	58	64.44	75	78	66	69	52.08
2022-10-14 17:20:00	13.94	65	73	64	64	58	64.43	75	78	67	69	52.15
2022-10-14 17:21:00	13.98	65	73	64	64	58	64.44	75	78	67	70	51.84
2022-10-14 17:22:00	13.98	65	74	64	64	58	64.42	76	79	67	70	51.76
2022-10-14 17:23:00	13.89	65	73	64	64	58	64.43	76	79	67	70	51.92
2022-10-14 17:23:00	14.01	65	74	64	64	58	64.42	76	79	67	70	51.84
2022-10-14 17:24:00	13.81	65	73	64	64	58	64.43	76	79	67	70	51.96
2022-10-14 17:25:00	13.88	65	73	64	64	58	64.44	76	79	67	69	51.94
2022-10-14 17:25:00	13.98	65	74	64	64	58	64.44	76	78	67	69	51.85
2022-10-14 17:26:00	13.95	65	73	64	64	58	64.42	75	78	67	69	51.77
2022-10-14 17:27:00	13.95	65	74	64	64	58	63.21	75	78	66	68	51.79
2022-10-14 17:27:00	13.89	65	73	64	64	58	64.43	75	77	66	68	51.84
2022-10-14 17:28:00	14.05	65	74	64	64	58	64.42	75	77	66	68	52.11
2022-10-14 17:28:00	14.05	65	73	64	64	58	64.42	74	77	66	68	52.23
2022-10-14 17:29:00	14.02	65	73	64	64	58	64.41	74	77	66	68	52.08
2022-10-14 17:30:00	13.98	65	74	64	64	58	64.43	74	77	66	68	52.2
2022-10-14 17:31:00	13.95	65	74	64	64	58	64.42	74	77	66	68	52.03
2022-10-14 17:31:00	13.93	65	74	64	64	58	64.42	74	77	66	68	52.21
2022-10-14 17:32:00	13.86	65	74	64	64	58	64.42	75	77	66	69	52.25
2022-10-14 17:33:00	13.84	65	73	64	64	58	64.43	75	77	66	69	52.07
2022-10-14 17:34:00	13.9	65	73	64	64	58	64.43	75	78	66	69	52.15
2022-10-14 17:35:00	13.88	65	73	64	64	58	64.42	75	78	67	69	52.07
2022-10-14 17:35:00	13.94	65	74	64	63	58	64.42	75	78	67	69	51.76
2022-10-14 17:36:00	13.81	65	74	64	64	58	64.42	76	78	67	70	51.94
2022-10-14 17:36:00	13.91	65	73	64	64	58	64.42	76	78	67	70	51.91
2022-10-14 17:37:00	13.88	65	73	64	64	58	64.42	76	79	67	70	51.86
2022-10-14 17:38:00	13.95	65	73	64	64	58	64.42	76	79	67	70	51.81
2022-10-14 17:38:00	14.05	65	73	64	64	58	64.42	76	79	67	70	51.86
2022-10-14 17:39:00	13.93	65	74	64	64	58	64.42	76	79	67	70	51.93
2022-10-14 17:39:00	14.05	65	74	64	64	58	64.41	76	78	67	70	51.93
2022-10-14 17:40:00	13.99	65	73	64	64	58	64.42	76	78	67	69	51.86
2022-10-14 17:40:00	14.05	65	73	64	64	58	64.4	75	78	67	69	51.98
2022-10-14 17:41:00	14	65	74	64	64	58	64.43	75	78	66	69	51.86
2022-10-14 17:42:00	14	65	73	64	64	58	64.42	75	78	66	68	51.92
2022-10-14 17:42:00	13.89	65	74	64	64	58	64.41	75	77	66	68	52.18
2022-10-14 17:43:00	13.93	65	73	64	64	58	64.4	74	77	66	68	52.22
2022-10-14 17:43:00	14.01	65	73	64	64	58	64.39	74	77	66	68	52.15
2022-10-14 17:44:00	14.04	65	73	64	64	58	64.39	74	77	66	68	52.03
2022-10-14 17:44:00	13.91	65	73	64	64	57	63.2	74	77	66	68	52.16
2022-10-14 17:45:00	13.96	65	73	64	64	58	64.41	74	77	66	68	52.09
2022-10-14 17:46:00	13.89	65	73	64	64	58	64.4	74	77	66	68	52.04
2022-10-14 17:46:00	13.95	65	73	64	64	58	64.4	74	77	66	68	52.01
2022-10-14 17:47:00	13.98	65	74	64	64	58	64.41	75	77	66	69	52.02
2022-10-14 17:47:00	13.99	65	74	64	64	58	64.41	75	77	66	69	52.06
2022-10-14 17:48:00	13.94	65	73	64	64	58	64.4	75	78	66	69	52.23
2022-10-14 17:49:00	13.94	65	73	64	63	58	64.4	75	78	66	69	52.12
2022-10-14 17:49:00	14	65	73	64	64	58	64.41	75	78	67	69	52.25
2022-10-14 17:50:00	13.91	65	74	64	64	58	64.41	75	78	67	69	51.93
2022-10-14 17:50:00	13.88	65	73	64	64	58	64.39	75	78	67	70	51.85
2022-10-14 17:51:00	14.11	65	73	64	64	58	64.39	76	78	67	70	51.82
2022-10-14 17:52:00	13.95	65	74	64	64	58	64.39	76	79	67	70	51.97
2022-10-14 17:53:00	13.85	65	73	64	64	58	63.2	76	79	67	70	51.9
2022-10-14 17:54:00	13.82	65	73	64	64	58	64.41	76	79	67	70	51.94
2022-10-14 17:54:00	13.85	65	73	64	64	58	64.4	76	79	67	70	51.9
2022-10-14 17:55:00	14.04	65	73	64	64	58	64.41	76	78	67	69	51.81
2022-10-14 17:56:00	13.99	65	73	64	64	58	64.41	75	78	66	69	51.76
2022-10-14 17:56:00	13.91	65	73	64	64	58	64.4	75	77	66	68	51.79
2022-10-14 17:57:00	13.91	65	73	64	64	58	64.4	75	77	66	68	51.85
2022-10-14 17:58:00	13.98	65	73	64	64	58	64.41	74	77	66	68	52.14
2022-10-14 17:58:00	13.85	65	73	64	64	58	64.4	74	77	66	68	52.24
2022-10-14 17:59:00	13.95	65	74	64	64	58	64.39	74	77	66	68	52.09
2022-10-14 17:59:00	13.85	65	73	64	64	58	64.4	74	77	65	68	52.14
2022-10-14 18:00:00	13.98	65	73	64	64	58	63.21	74	77	66	68	52.08
2022-10-14 18:00:00	14.04	65	73	64	64	58	63.21	74	77	66	68	52.03
2022-10-14 18:01:00	13.91	65	73	64	64	58	64.42	75	77	66	68	52.01
2022-10-14 18:02:00	13.91	65	73	64	64	58	64.43	75	77	66	69	52.02
2022-10-14 18:02:00	13.81	65	73	64	64	58	64.42	75	77	66	69	52.06
2022-10-14 18:03:00	14.06	65	73	64	64	58	63.21	75	77	66	69	52.11
2022-10-14 18:04:00	13.98	65	74	64	64	58	64.46	75	78	67	69	52.22
2022-10-14 18:05:00	13.98	65	73	64	64	58	64.46	76	78	67	70	51.81
2022-10-14 18:05:00	13.95	65	73	64	64	57	64.46	76	78	67	70	51.77
2022-10-14 18:06:00	13.9	65	73	64	64	58	64.46	76	79	67	70	51.94
2022-10-14 18:07:00	14.09	65	73	64	64	58	64.46	77	79	67	70	51.8
2022-10-14 18:09:00	14.02	65	73	64	64	58	64.47	76	79	67	70	51.96
2022-10-14 18:10:00	13.84	65	73	64	64	58	63.24	75	78	67	69	51.98
2022-10-14 18:11:00	13.99	65	73	64	64	58	64.01	75	78	66	69	51.83
2022-10-14 18:12:00	13.89	65	74	64	64	58	64.03	75	77	66	68	52.14
2022-10-14 18:13:00	13.96	65	73	64	64	58	64.05	74	77	66	68	52.11
2022-10-14 18:14:00	13.89	65	73	64	64	58	64.07	74	77	66	68	52.11
2022-10-14 18:15:00	13.96	65	73	64	64	58	64.09	74	77	66	68	52.23
2022-10-14 18:16:00	13.94	65	73	64	64	58	64.11	75	77	66	68	52.2
2022-10-14 18:17:00	13.91	65	73	64	64	58	64.15	75	78	66	69	52.12
2022-10-14 18:18:00	13.9	65	73	64	64	58	64.15	75	78	66	69	52.12
2022-10-14 18:19:00	13.9	65	73	64	64	58	64.16	76	78	67	70	51.95
2022-10-14 18:20:00	13.98	65	74	64	64	58	64.17	76	78	67	70	51.84
2022-10-14 18:21:00	13.98	65	73	64	64	58	64.19	76	79	67	70	51.99
2022-10-14 18:22:00	13.95	65	73	64	63	58	63.11	76	79	67	70	51.93
2022-10-14 18:23:00	14.05	65	73	64	64	58	64.22	76	79	67	70	51.87
2022-10-14 18:24:00	13.91	65	73	64	64	58	64.26	76	78	67	69	51.94
2022-10-14 18:25:00	14	65	73	64	64	58	64.3	75	78	66	69	51.81
2022-10-14 18:26:00	13.82	65	73	64	64	58	63.15	75	78	66	68	51.92
2022-10-14 18:27:00	14.01	65	73	64	64	58	64.3	75	77	66	68	52.08
2022-10-14 18:28:00	13.93	65	73	64	64	58	63.16	75	77	66	68	52.07
2022-10-14 18:29:00	13.98	65	73	64	64	58	64.35	75	77	66	68	52.08
2022-10-14 18:30:00	13.91	65	73	64	64	58	64.39	75	77	66	68	52.05
2022-10-14 18:32:00	13.94	65	73	64	64	58	63.19	75	78	66	69	52.11
2022-10-14 18:33:00	13.93	65	73	64	64	58	63.2	75	78	66	69	52.14
2022-10-14 18:34:00	14.05	65	73	64	64	57	64.41	76	78	67	69	51.94
2022-10-14 18:35:00	13.96	65	73	64	64	58	63.21	76	79	67	70	51.79
2022-10-14 18:36:00	13.91	65	73	64	63	58	64.4	77	79	68	70	51.93
2022-10-14 18:37:00	13.88	65	73	64	64	58	64.43	77	79	67	70	51.92
2022-10-14 18:38:00	13.94	65	73	64	63	58	64.45	76	79	67	70	51.91
2022-10-14 18:39:00	13.98	65	73	64	64	58	64.47	75	78	66	69	51.97
2022-10-14 18:41:00	13.89	65	73	64	63	58	63.25	75	78	66	68	51.79
2022-10-14 18:42:00	13.94	65	73	64	64	58	63	75	77	66	68	52.15
2022-10-14 18:43:00	13.86	65	73	64	64	58	64.05	75	77	66	68	52.21
2022-10-14 18:44:00	13.9	65	73	64	64	58	63.03	75	77	66	68	52.05
2022-10-14 18:45:00	13.89	65	73	64	64	57	64.07	75	77	66	69	52.01
2022-10-14 18:46:00	14.01	65	74	64	63	57	63.04	75	78	66	69	52.11
2022-10-14 18:47:00	13.99	65	73	64	63	58	63.04	75	78	66	69	52.06
2022-10-14 18:49:00	14.02	65	73	64	64	57	63.06	76	78	67	70	51.79
2022-10-14 18:50:00	13.99	65	73	64	64	58	64.12	76	79	67	70	51.93
2022-10-14 18:51:00	13.96	65	73	64	64	58	64.1	77	79	67	70	51.99
2022-10-14 18:52:00	13.96	65	73	64	64	58	64.12	77	79	67	70	51.92
2022-10-14 18:53:00	14.02	65	73	64	64	58	63.07	76	79	67	69	51.83
2022-10-14 18:55:00	13.93	65	73	64	63	58	64.17	75	78	66	69	51.84
2022-10-14 18:56:00	14.05	65	73	64	63	58	63.09	75	78	66	68	52.17
2022-10-14 18:57:00	13.99	65	73	64	63	58	63.11	75	77	66	68	52.14
2022-10-14 18:58:00	13.99	65	73	64	64	58	63.12	75	77	66	68	52.18
2022-10-14 18:59:00	14.04	65	73	64	64	58	63.12	75	77	66	68	52.04
2022-10-14 19:00:00	13.84	65	73	64	64	57	63.13	75	78	66	69	52.01
2022-10-14 19:01:00	14.02	65	73	64	64	58	63.14	75	78	66	69	52.13
2022-10-14 19:02:00	13.89	65	73	64	64	57	63.14	75	78	67	69	52.1
2022-10-14 19:04:00	14.07	65	73	64	64	58	63.15	76	78	67	70	51.91
2022-10-14 19:05:00	13.89	65	73	64	63	58	63.15	76	79	67	70	51.96
2022-10-14 19:06:00	13.81	65	73	64	63	58	63.15	77	79	67	70	51.83
2022-10-14 19:07:00	14.01	65	73	64	63	57	63.17	77	79	67	70	51.83
2022-10-14 19:08:00	14.02	65	73	64	63	58	63.18	76	78	67	69	51.97
2022-10-14 19:09:00	13.93	65	73	64	64	58	64.37	75	78	66	69	51.91
2022-10-14 19:10:00	13.88	65	73	64	63	58	63.18	75	78	66	69	51.99
2022-10-14 19:11:00	14.01	65	73	64	64	57	63.19	75	78	66	68	52.16
2022-10-14 19:12:00	13.86	65	73	64	63	58	63.21	75	77	66	68	52.06
2022-10-14 19:13:00	14	65	73	63	64	58	63.21	75	77	66	68	52.22
2022-10-14 19:14:00	13.98	65	73	63	63	58	63.22	75	78	66	69	52.1
2022-10-14 19:15:00	13.95	65	73	63	64	58	63.23	75	78	66	69	52.13
2022-10-14 19:17:00	13.9	65	73	63	63	57	63.24	75	78	66	69	52.02
2022-10-14 19:18:00	13.88	65	73	64	63	57	63.25	76	78	67	70	51.9
2022-10-14 19:19:00	13.94	65	73	64	64	58	63	76	79	67	70	51.76
2022-10-14 19:20:00	13.98	65	73	63	64	57	63.01	77	79	67	70	51.92
2022-10-14 19:21:00	13.89	65	73	63	63	58	63.02	77	79	68	70	51.76
2022-10-14 19:22:00	13.93	65	73	64	63	58	64.08	76	79	67	70	51.92
2022-10-14 19:25:00	13.88	65	73	63	64	58	63.05	75	78	66	69	51.88
2022-10-14 19:27:00	13.85	65	73	64	63	57	63.08	75	77	66	68	52.05
2022-10-14 19:28:00	13.91	65	73	63	63	57	63.08	75	78	66	68	52.07
2022-10-14 19:30:00	13.88	65	73	63	63	57	63.1	75	78	66	69	52.06
2022-10-14 19:31:00	13.98	65	73	63	63	57	63.11	75	78	66	69	52.17
2022-10-14 19:32:00	13.82	65	73	63	63	57	63.13	76	78	67	70	51.8
2022-10-14 19:33:00	13.9	65	74	63	63	58	63.15	76	78	67	70	51.89
2022-10-14 19:34:00	13.9	65	73	63	63	58	63.16	77	79	67	70	51.79
2022-10-14 19:36:00	13.96	65	73	63	63	57	63.17	77	79	68	70	51.81
2022-10-14 19:37:00	13.81	65	73	63	63	57	63.18	76	79	67	70	51.87
2022-10-14 19:38:00	13.94	65	73	63	63	57	63.19	76	78	67	69	51.83
2022-10-14 19:39:00	13.85	65	73	63	63	58	63.21	75	78	66	69	51.94
2022-10-14 19:41:00	13.81	65	73	63	63	58	63.22	75	78	66	68	52.12
2022-10-14 19:42:00	13.81	65	73	64	63	57	63.25	75	77	66	68	52.21
2022-10-14 19:43:00	13.75	65	73	63	63	57	63.02	75	77	66	68	52.03
2022-10-14 19:45:00	13.85	65	73	63	63	57	63.04	75	78	66	69	52.06
2022-10-14 19:46:00	13.84	65	73	63	63	58	63.07	75	78	67	69	51.85
2022-10-14 19:48:00	13.68	65	73	63	63	57	63.12	76	79	67	70	51.78
2022-10-14 19:50:00	13.51	65	73	63	63	57	63.17	76	79	67	70	51.87
2022-10-14 19:51:00	13.32	65	73	63	63	57	63.21	76	78	67	70	51.87
2022-10-14 19:53:00	13.48	65	73	63	63	57	63.01	75	78	66	69	51.78
2022-10-14 19:54:00	13.29	65	73	63	63	57	63.05	74	77	66	68	51.91
2022-10-14 19:56:00	13.41	64	72	63	63	57	63.11	74	77	66	68	52.04
2022-10-14 19:57:00	13.06	64	72	63	63	57	63.16	74	77	66	68	52.05
2022-10-14 19:59:00	13.2	64	72	63	63	57	63.19	74	77	66	68	51.76
2022-10-14 20:00:00	13.16	64	72	63	62	57	63.24	74	77	66	69	51.92
2022-10-14 20:01:00	13.11	64	72	63	62	57	63.04	75	77	66	69	51.79
2022-10-14 20:03:00	13.04	64	72	63	62	57	62.09	75	78	67	70	51.85
2022-10-14 20:04:00	12.95	64	72	62	62	56	62.14	75	78	67	70	51.93
2022-10-14 20:06:00	12.8	64	72	62	62	56	62.19	75	78	67	69	51.63
2022-10-14 20:07:00	12.75	64	72	62	62	56	62.24	74	77	66	69	51.51
2022-10-14 20:09:00	12.82	64	72	62	62	56	62.04	74	76	65	68	51.87
2022-10-14 20:10:00	12.71	63	72	62	62	56	62.07	73	76	65	68	51.89
2022-10-14 20:11:00	12.66	64	72	62	62	56	62.12	73	76	65	68	51.91
2022-10-14 20:13:00	12.48	63	71	62	62	56	62.16	73	76	65	68	52
2022-10-14 20:13:00	12.54	63	71	62	62	56	62.18	73	76	65	68	51.98
2022-10-14 20:14:00	12.61	63	71	62	62	56	62.21	73	76	65	68	51.81
2022-10-14 20:15:00	12.56	63	71	62	61	56	61	74	77	66	69	51.62
2022-10-14 20:17:00	12.43	63	71	61	61	56	62.04	74	77	66	69	51.69
2022-10-14 20:18:00	12.4	63	70	61	61	56	61.08	75	77	67	70	51.53
2022-10-14 20:19:00	12.27	63	71	61	61	55	61.11	75	77	67	70	51.65
2022-10-14 20:20:00	12.31	63	71	61	61	55	61.15	74	77	67	69	51.6
2022-10-14 20:21:00	12.19	62	71	61	61	55	61.17	74	77	66	68	51.65
2022-10-14 20:22:00	12.26	62	70	61	61	55	61.21	73	76	65	68	51.51
2022-10-14 20:24:00	12.11	62	70	61	61	55	61.25	73	76	65	68	51.65
2022-10-14 20:25:00	12.15	62	70	61	61	55	61.06	72	75	65	68	51.72
2022-10-14 20:26:00	12.07	62	70	61	61	55	61.1	72	75	65	68	51.69
2022-10-14 20:28:00	12.16	62	70	61	60	55	60.13	72	75	65	68	51.62
2022-10-14 20:29:00	11.94	62	70	61	61	55	60.18	73	75	65	68	51.51
2022-10-14 20:30:00	11.99	62	70	60	60	55	60.22	73	76	66	68	51.35
2022-10-14 20:32:00	11.99	62	70	60	60	54	60.25	74	76	66	69	51.42
2022-10-14 20:33:00	11.9	62	70	60	60	54	60.06	74	77	66	69	51.45
2022-10-14 20:34:00	11.84	62	69	60	60	55	60.09	74	77	66	69	51.26
2022-10-14 20:35:00	11.85	61	70	60	60	54	60.13	74	76	66	69	51.14
2022-10-14 20:36:00	11.71	61	70	60	60	54	60.17	73	76	65	68	51.16
2022-10-14 20:37:00	11.75	61	69	60	60	54	60.21	73	75	65	68	51.31
2022-10-14 20:39:00	11.55	61	69	60	60	54	60.01	72	75	65	67	51.29
2022-10-14 20:40:00	11.11	61	69	60	59	54	59.17	72	75	65	67	51.44
2022-10-14 20:41:00	10.93	61	69	59	59	54	59.06	71	74	65	67	51.29
2022-10-14 20:42:00	10.48	61	69	59	59	54	59.01	71	74	65	67	51.49
2022-10-14 20:44:00	10.39	61	69	59	59	54	59.14	71	74	65	67	51.12
2022-10-14 20:45:00	10.04	60	68	59	59	53	59.1	71	74	65	68	51.22
2022-10-14 20:46:00	9.7	60	68	58	58	53	58.23	72	75	65	68	51.03
2022-10-14 20:48:00	9.39	59	67	58	58	53	58.23	72	75	65	68	50.94
2022-10-14 20:49:00	9.3	59	67	58	58	52	58.03	71	74	65	68	50.89
2022-10-14 20:50:00	9.05	59	66	57	57	52	57.16	71	74	65	67	50.75
2022-10-14 20:51:00	9	58	66	57	57	52	57.24	70	73	64	66	50.91
2022-10-14 20:53:00	8.91	58	66	56	56	51	56.14	69	72	64	66	50.84
2022-10-14 20:54:00	8.76	58	66	56	56	51	56	69	72	63	66	50.93
2022-10-14 20:55:00	8.75	57	65	56	56	51	56.05	69	72	63	65	50.75
2022-10-14 20:56:00	8.63	57	65	56	56	51	56.18	69	72	63	66	50.94
2022-10-14 20:58:00	8.65	57	65	56	56	50	56.23	69	72	64	66	50.55
2022-10-14 20:59:00	8.73	56	65	55	55	50	55.06	69	72	64	66	50.61
2022-10-14 21:00:00	8.66	56	64	55	55	50	55.11	69	73	64	66	50.35
2022-10-14 21:01:00	8.64	56	64	55	55	50	55.18	70	73	64	67	50.27
2022-10-14 21:02:00	8.71	56	64	55	55	50	55.22	70	73	64	67	50.27
2022-10-14 21:04:00	8.63	56	64	55	55	50	55.04	69	73	64	67	50.18
2022-10-14 21:05:00	8.6	56	64	55	55	50	55.1	69	72	64	66	50.03
2022-10-14 21:06:00	8.45	56	64	54	54	50	54.14	68	72	63	65	50.06
2022-10-14 21:07:00	8.61	56	64	54	54	49	54.21	68	71	63	65	50.07
2022-10-14 21:09:00	8.44	55	64	54	54	49	54.01	68	71	63	65	50.22
2022-10-14 21:10:00	8.44	55	63	54	54	49	54.04	68	71	63	65	50.13
2022-10-14 21:12:00	8.56	55	63	54	54	49	54.08	68	72	63	66	49.81
2022-10-14 21:13:00	8.41	55	63	54	54	49	54.18	69	72	64	66	49.88
2022-10-14 21:15:00	8.4	55	62	54	54	49	54.21	69	72	64	66	49.75
2022-10-14 21:16:00	8.43	55	63	54	54	48	54.01	70	73	64	67	49.62
2022-10-14 21:18:00	8.36	55	62	54	53	48	53.08	69	73	64	67	49.6
2022-10-14 21:19:00	8.34	54	62	53	53	48	53.13	69	72	64	66	49.73
2022-10-14 21:21:00	8.36	54	62	53	53	48	53.2	68	71	63	65	49.51
2022-10-14 21:22:00	8.35	54	62	53	53	48	53.23	68	71	63	65	49.54
2022-10-14 21:24:00	8.06	54	62	53	53	48	53.05	67	71	63	65	49.69
2022-10-14 21:25:00	8.19	54	62	53	53	48	53.11	68	71	63	65	49.61
2022-10-14 21:26:00	8.13	54	62	53	53	48	53.16	68	71	63	65	49.53
2022-10-14 21:28:00	8.19	54	62	53	53	48	53.2	68	72	63	66	49.61
2022-10-14 21:29:00	8.01	54	62	53	52	48	52.25	69	72	63	66	49.48
2022-10-14 21:31:00	8.01	54	62	52	52	48	52.08	69	72	64	66	49.33
2022-10-14 21:32:00	8.04	54	61	52	52	48	52.13	69	72	64	66	49.36
2022-10-14 21:34:00	7.94	54	61	52	52	47	52.2	68	72	63	65	49.29
2022-10-14 21:35:00	7.89	54	61	52	52	48	52.24	68	71	63	65	49.36
2022-10-14 21:36:00	7.88	53	61	52	52	47	52.03	67	71	62	65	49.27
2022-10-14 21:38:00	7.85	53	61	52	52	47	52.1	67	70	62	64	49.34
2022-10-14 21:39:00	7.82	53	61	52	52	47	52.18	67	70	62	65	49.35
2022-10-14 21:41:00	7.76	53	61	52	52	47	52.23	67	71	63	65	49.47
2022-10-14 21:42:00	7.72	53	61	52	52	47	52.03	68	71	63	65	49.45
2022-10-14 21:44:00	7.66	53	61	52	52	47	52.04	68	71	63	65	49.16
2022-10-14 21:45:00	7.72	53	61	52	52	47	52.1	68	71	63	65	49.22
2022-10-14 21:47:00	7.65	53	61	52	52	47	52.17	68	71	63	66	49.14
2022-10-14 21:48:00	7.69	53	61	52	52	47	52.22	68	72	63	66	49.07
2022-10-14 21:49:00	7.72	53	61	52	52	47	52.03	68	71	63	65	49.04
2022-10-14 21:51:00	7.6	53	61	52	52	47	52.14	67	71	62	64	49.14
2022-10-14 21:52:00	7.57	53	61	52	52	47	52.18	67	70	62	64	49.13
2022-10-14 21:53:00	7.48	53	61	52	52	47	52.22	67	70	62	64	49.23
2022-10-14 21:55:00	7.53	53	61	52	52	47	52.05	67	70	62	64	49.06
2022-10-14 21:56:00	7.36	53	61	52	52	47	52.12	67	70	62	64	49.16
2022-10-14 21:58:00	7.32	53	61	52	52	47	52.14	67	70	62	65	48.92
2022-10-14 21:59:00	7.28	53	61	52	52	47	52.21	67	71	62	65	48.93
2022-10-14 22:01:00	7.27	53	61	52	52	48	52.02	67	71	63	65	48.91
2022-10-14 22:02:00	7.25	53	61	52	52	47	52.05	67	71	63	65	48.88
2022-10-14 22:04:00	7.31	53	61	52	52	48	52.14	67	71	63	65	48.83
2022-10-14 22:05:00	7.19	53	61	52	52	48	52.05	67	71	63	65	48.9
2022-10-14 22:07:00	7.18	53	61	52	52	48	52.07	67	70	62	64	48.95
2022-10-14 22:08:00	7.14	54	61	52	52	48	52.21	66	70	61	64	48.97
2022-10-14 22:10:00	7.14	53	61	52	52	48	52.16	66	70	61	64	48.92
2022-10-14 22:12:00	7.12	54	61	52	52	48	52.17	66	70	61	64	48.86
2022-10-14 22:13:00	7.03	54	61	52	52	48	52.14	67	70	62	64	48.77
2022-10-14 22:14:00	6.99	54	61	52	52	48	52.2	67	70	62	64	48.77
2022-10-14 22:16:00	7.03	54	61	52	52	48	52.02	67	70	62	65	48.71
2022-10-14 22:17:00	7.06	54	61	52	52	48	52.17	67	71	62	65	48.56
2022-10-14 22:18:00	6.98	54	61	52	52	48	52.01	67	71	63	65	48.72
2022-10-14 22:20:00	6.98	54	61	52	52	48	52.1	67	71	62	65	48.57
2022-10-14 22:21:00	6.91	54	61	52	52	48	52.17	67	70	62	64	48.58
2022-10-14 22:22:00	7.01	54	61	52	52	48	52.08	66	70	61	64	48.53
2022-10-14 22:23:00	6.94	54	61	53	52	48	52.01	66	69	61	64	48.55
2022-10-14 22:28:00	6.88	54	61	52	52	48	52.11	66	69	61	64	48.54
2022-10-14 22:29:00	6.86	54	61	52	52	48	52.19	66	70	62	64	48.52
2022-10-14 22:30:00	6.86	53	61	52	52	48	52.1	67	70	62	64	48.55
2022-10-14 22:32:00	6.83	53	61	52	52	48	52.11	67	70	62	65	48.58
2022-10-14 22:33:00	6.71	53	61	52	52	47	52.09	67	70	62	65	48.33
2022-10-14 22:35:00	6.8	53	61	52	52	47	52.2	67	70	62	65	48.26
2022-10-14 22:36:00	6.72	53	61	52	52	47	52.13	66	70	62	64	48.32
2022-10-14 22:38:00	6.78	53	61	52	52	47	52.02	66	69	61	64	48.54
2022-10-14 22:39:00	6.78	53	61	52	52	47	52.01	65	69	61	63	48.6
2022-10-14 22:41:00	6.72	53	60	52	51	47	51.24	65	69	61	63	48.75
2022-10-14 22:42:00	6.71	53	61	51	51	47	51.22	65	69	61	63	48.71
2022-10-14 22:44:00	6.69	52	60	51	51	47	51.12	66	69	61	64	48.41
2022-10-14 22:45:00	6.67	52	60	51	51	47	51.06	66	70	61	64	48.42
2022-10-14 22:47:00	6.64	52	60	51	51	47	51.07	66	70	62	64	48.45
2022-10-14 22:48:00	6.56	52	60	51	51	47	51.21	66	70	62	64	48.47
2022-10-14 22:50:00	6.64	52	60	51	51	46	51.09	66	70	62	65	48.44
2022-10-14 22:51:00	6.67	52	60	51	51	46	51.03	66	70	62	64	48.47
2022-10-14 22:52:00	6.64	52	59	51	51	46	51.19	66	69	61	64	48.43
2022-10-14 22:54:00	6.67	52	59	51	51	46	51.15	65	69	61	63	48.48
2022-10-14 22:55:00	6.72	52	59	51	51	46	50.09	65	69	61	63	48.33
2022-10-14 22:57:00	6.67	52	59	51	50	46	50.18	65	69	61	63	48.41
2022-10-14 22:58:00	6.64	52	59	51	50	46	50.22	65	69	61	63	48.49
2022-10-14 23:00:00	6.64	52	59	51	50	46	50.03	66	69	61	64	48.47
2022-10-14 23:01:00	6.65	52	59	50	50	46	50.22	66	70	61	64	48.01
2022-10-14 23:03:00	6.62	52	59	50	50	46	50.12	66	70	62	64	48.02
2022-10-14 23:04:00	6.7	52	59	50	50	46	50.23	66	70	62	64	48
2022-10-14 23:05:00	6.71	52	59	51	50	46	50.23	66	70	62	64	48.16
2022-10-14 23:07:00	6.67	52	59	50	50	46	50.08	66	70	62	64	48.14
2022-10-14 23:08:00	6.64	52	59	50	50	46	50.04	66	69	61	64	48.21
2022-10-14 23:17:00	6.65	51	59	51	51	46	50.05	66	70	62	64	48.2
2022-10-14 23:21:00	6.71	52	59	51	50	46	51.18	67	70	62	65	48.24
2022-10-14 23:22:00	6.7	52	59	51	51	46	50.11	66	70	62	64	48.24
2022-10-14 23:24:00	6.67	52	59	51	50	46	51.13	66	69	61	64	48.19
2022-10-14 23:25:00	6.68	52	59	51	50	46	51.18	65	69	61	63	48.46
2022-10-14 23:26:00	6.63	52	60	51	51	46	51.2	65	69	61	63	48.31
2022-10-14 23:27:00	6.64	52	60	51	51	46	51.12	65	69	61	63	48.42
2022-10-14 23:29:00	6.76	52	59	51	51	46	51.07	65	69	61	63	48.44
2022-10-14 23:30:00	6.7	52	59	51	51	46	51.14	66	69	61	64	48.4
2022-10-14 23:32:00	6.7	52	60	51	51	46	51.06	66	69	61	64	48.13
2022-10-14 23:33:00	6.66	52	59	51	51	46	51.23	66	70	62	64	48.11
2022-10-14 23:35:00	6.71	52	60	51	51	47	51.12	66	70	62	64	48.09
2022-10-14 23:36:00	6.64	52	60	51	51	47	51.18	66	70	62	64	48.02
2022-10-14 23:37:00	6.66	52	60	51	51	47	51.22	66	70	62	64	48.16
2022-10-14 23:39:00	6.63	52	60	51	51	46	51.17	66	70	61	64	48.09
2022-10-14 23:40:00	6.66	52	60	51	51	47	51.1	66	69	61	64	48.16
2022-10-14 23:41:00	6.64	52	60	51	51	47	51.22	65	69	61	63	48.03
2022-10-14 23:43:00	6.72	52	60	51	51	47	51.2	65	69	61	63	48.47
2022-10-14 23:44:00	6.64	52	60	51	51	47	51.08	65	69	61	63	48.36
2022-10-14 23:45:00	6.63	52	60	51	51	47	51.2	66	69	61	64	48.41
2022-10-14 23:47:00	6.71	52	60	51	51	47	51.1	66	69	61	64	48.1
2022-10-14 23:48:00	6.64	52	60	51	51	47	51.11	66	70	61	64	48.08
2022-10-14 23:50:00	6.63	52	60	51	51	47	51.06	66	70	62	64	48.06
2022-10-14 23:51:00	6.64	52	60	52	51	47	51.13	66	70	62	64	48.04
2022-10-14 23:52:00	6.68	52	60	51	51	47	51.07	67	70	62	64	48.23
2022-10-14 23:54:00	6.72	52	60	51	51	47	51.24	66	70	62	64	48.01
2022-10-14 23:55:00	6.71	52	60	52	51	47	51.08	66	70	61	64	48.07
2022-10-14 23:56:00	6.68	53	60	52	51	47	51.06	65	69	61	63	48.01
2022-10-14 23:57:00	6.72	53	60	52	51	47	51	65	69	61	63	48.46
2022-10-14 23:58:00	6.67	53	61	52	51	47	51.09	65	69	61	63	48.34
2022-10-15	6.69	53	61	52	51	47	51.14	65	69	61	63	48.45
2022-10-15 00:01:00	6.68	53	60	52	52	47	52.01	65	69	61	63	48.25
2022-10-15 00:02:00	6.69	53	61	52	52	47	52.02	66	69	61	64	48.47
2022-10-15 00:03:00	6.71	53	61	52	52	47	52.24	66	70	61	64	48.14
2022-10-15 00:04:00	6.74	53	61	52	52	47	52.24	66	70	62	64	48.05
2022-10-15 00:05:00	6.62	53	61	52	52	47	52.07	66	70	62	64	48.05
2022-10-15 00:07:00	6.7	53	61	52	52	47	52.04	66	70	62	64	48.2
2022-10-15 00:08:00	6.74	53	61	52	51	47	52.1	66	70	62	64	48.06
2022-10-15 00:09:00	6.72	53	60	52	51	47	52.06	66	70	62	64	48.16
2022-10-15 00:10:00	6.74	53	60	51	51	47	51.07	66	70	62	64	48.11
2022-10-15 00:11:00	6.66	52	61	52	51	47	51.13	66	69	61	63	48.07
2022-10-15 00:12:00	6.71	53	61	52	51	47	51.09	65	69	61	63	48.06
2022-10-15 00:13:00	6.64	52	60	51	51	47	51.14	65	69	61	63	48.06
2022-10-15 00:15:00	6.69	52	60	51	51	47	51.2	65	69	61	63	48.34
2022-10-15 00:16:00	6.71	52	60	51	51	47	51.19	65	69	61	63	48.33
2022-10-15 00:17:00	6.67	52	60	51	51	47	51.19	66	69	61	64	48.23
2022-10-15 00:18:00	6.74	52	60	51	51	47	51.07	66	70	61	64	48.13
2022-10-15 00:19:00	6.72	52	60	51	51	46	51.15	66	70	61	64	48.11
2022-10-15 00:21:00	6.74	52	60	51	51	47	51.07	66	70	62	64	48.25
2022-10-15 00:22:00	6.72	52	60	51	51	46	51.04	66	70	62	64	48.21
2022-10-15 00:23:00	6.68	52	60	51	51	46	51.07	66	70	62	64	48.08
2022-10-15 00:24:00	6.71	52	60	51	51	46	51.03	67	70	62	64	48.22
2022-10-15 00:26:00	6.69	52	59	51	51	46	51.17	66	70	62	64	48.19
2022-10-15 00:27:00	6.71	52	60	51	51	46	51.03	66	69	61	63	48.17
2022-10-15 00:28:00	6.69	52	59	51	51	46	51.08	65	69	61	63	48.16
2022-10-15 00:29:00	6.71	52	59	51	50	46	50.13	65	69	61	63	48.26
2022-10-15 00:30:00	6.78	52	59	51	50	46	51.18	65	69	61	63	48.32
2022-10-15 00:31:00	6.69	51	59	51	50	46	50.12	65	69	61	63	48.27
2022-10-15 00:32:00	6.71	52	59	50	50	46	50.15	65	69	61	63	48.32
2022-10-15 00:33:00	6.69	52	59	50	50	46	50.11	66	69	61	64	48.43
2022-10-15 00:34:00	6.71	51	59	50	50	46	50.23	66	69	61	64	48.08
2022-10-15 00:35:00	6.69	51	59	50	50	46	50.08	66	70	62	64	48.05
2022-10-15 00:37:00	6.72	51	59	50	50	46	50.13	66	70	62	64	48.03
2022-10-15 00:38:00	6.72	51	59	50	50	46	50.12	66	70	62	64	48.16
2022-10-15 00:39:00	6.66	51	59	50	50	46	50.11	66	70	62	64	48.09
2022-10-15 00:41:00	6.69	51	59	50	50	46	50.15	66	70	62	64	48.18
2022-10-15 00:42:00	6.72	51	59	50	50	46	50.15	66	70	61	64	48.06
2022-10-15 00:43:00	6.68	51	59	50	50	46	50.22	65	69	61	63	48.22
2022-10-15 00:45:00	6.63	51	59	50	50	46	50.08	65	69	61	63	48.09
2022-10-15 00:46:00	6.78	51	59	50	50	46	50.03	65	69	61	63	48.15
2022-10-15 00:48:00	6.74	51	59	50	50	46	50.02	65	69	61	63	48.36
2022-10-15 00:49:00	6.69	51	59	50	50	46	50.05	65	69	61	64	48.25
2022-10-15 00:50:00	6.71	51	59	50	50	46	50.2	66	69	61	64	48.13
2022-10-15 00:51:00	6.71	51	59	50	50	46	50.1	66	70	61	64	48.13
2022-10-15 00:53:00	6.71	51	59	50	50	46	50.11	66	70	62	64	48.08
2022-10-15 00:54:00	6.66	52	59	50	50	46	50.13	66	70	62	64	48.23
2022-10-15 00:55:00	6.77	51	59	51	50	46	50.13	66	70	62	64	48.15
2022-10-15 00:57:00	6.77	52	59	51	50	46	50.13	66	70	62	64	48.21
2022-10-15 00:58:00	6.71	52	59	51	50	46	50.09	66	69	62	64	48.11
2022-10-15 00:59:00	6.69	52	59	51	50	46	50.23	65	69	61	63	48
2022-10-15 01:01:00	6.74	52	59	50	50	46	50.21	65	69	61	63	48.37
2022-10-15 01:02:00	6.66	52	60	51	50	46	51.11	65	69	61	63	48.35
2022-10-15 01:03:00	6.71	52	59	51	51	46	51.15	65	69	61	63	48.3
2022-10-15 01:04:00	6.73	52	59	51	50	46	51.01	65	69	61	64	48.37
2022-10-15 01:06:00	6.72	52	59	51	51	46	51.24	66	69	61	64	48.02
2022-10-15 01:07:00	6.71	52	59	51	51	46	51.24	66	69	61	64	48.15
2022-10-15 01:09:00	6.71	52	59	51	51	46	51.13	66	69	61	64	48.09
2022-10-15 01:10:00	6.73	52	60	51	51	46	51.1	66	70	61	64	48.03
2022-10-15 01:11:00	6.72	52	60	51	51	46	51.05	66	70	62	64	48.15
2022-10-15 01:12:00	6.71	52	60	51	51	46	51.06	66	70	62	64	48.05
2022-10-15 01:13:00	6.73	52	60	51	51	46	51.18	66	70	62	64	48.12
2022-10-15 01:15:00	6.69	52	60	51	51	46	51.12	66	70	62	64	48.11
2022-10-15 01:16:00	6.72	52	59	51	51	47	51.03	66	69	61	64	48.13
2022-10-15 01:17:00	6.74	52	60	51	51	46	51.1	65	69	61	63	48.03
2022-10-15 01:19:00	6.7	52	60	51	51	47	51.14	65	69	61	63	48.02
2022-10-15 01:20:00	6.71	52	60	51	51	47	51.12	65	69	61	63	48.45
2022-10-15 01:21:00	6.69	52	60	51	51	47	51	65	69	61	63	48.23
2022-10-15 01:22:00	6.67	52	60	51	51	47	51.2	66	69	61	64	48.13
2022-10-15 01:25:00	6.74	53	60	51	51	47	51.07	66	70	61	64	48.2
2022-10-15 01:26:00	6.76	53	60	51	51	47	51.12	66	70	62	64	48.12
2022-10-15 01:28:00	6.7	53	60	51	51	47	51.18	66	70	62	64	48.02
2022-10-15 01:29:00	6.71	53	60	51	51	47	51.19	66	70	62	64	48.11
2022-10-15 01:30:00	6.72	52	60	51	51	47	51.07	66	70	62	64	48.15
2022-10-15 01:32:00	6.68	52	60	51	51	47	51.25	66	69	61	64	48
2022-10-15 01:33:00	6.71	52	60	51	51	47	51.09	66	69	61	63	48.05
2022-10-15 01:34:00	6.69	53	60	52	51	47	51.11	65	69	61	63	48.48
2022-10-15 01:35:00	6.68	53	61	52	51	47	51.25	65	69	61	63	48.33
2022-10-15 01:36:00	6.7	53	61	51	51	47	51.04	65	69	61	63	48.26
2022-10-15 01:37:00	6.63	53	60	52	51	47	51.11	65	69	61	63	48.26
2022-10-15 01:38:00	6.72	53	60	52	51	47	52.02	65	69	61	64	48.37
2022-10-15 01:39:00	6.68	53	60	52	51	47	52.18	66	69	61	64	48
2022-10-15 01:40:00	6.72	53	61	52	52	47	52.16	66	69	62	64	48.12
2022-10-15 01:41:00	6.74	53	61	52	51	47	52.17	66	70	61	64	48.05
2022-10-15 01:42:00	6.71	53	61	52	52	47	52.24	66	70	62	64	48.21
2022-10-15 01:44:00	6.7	53	60	52	52	47	52.07	66	70	62	64	48.05
2022-10-15 01:45:00	6.7	53	61	52	51	47	51	66	70	62	64	48.15
2022-10-15 01:46:00	6.71	53	61	52	51	47	52.09	66	70	62	64	48.08
2022-10-15 01:48:00	6.71	52	61	52	51	47	51.14	66	69	61	63	48.08
2022-10-15 01:49:00	6.69	52	60	51	51	47	51.04	65	69	61	63	48.36
2022-10-15 01:50:00	6.63	52	61	51	51	47	51.03	65	69	61	63	48.33
2022-10-15 01:51:00	6.78	53	60	52	51	47	51.17	65	69	61	63	48.49
2022-10-15 01:53:00	6.72	52	60	51	51	47	51.14	65	69	61	64	48.32
2022-10-15 01:55:00	6.74	52	60	51	51	47	51.08	66	69	61	64	48.13
2022-10-15 01:57:00	6.73	52	60	51	51	46	51.14	66	70	62	64	48.06
2022-10-15 01:58:00	6.74	52	60	51	51	46	51.11	66	70	62	64	48.19
2022-10-15 01:59:00	6.71	52	60	51	51	46	51.04	66	70	62	64	48.12
2022-10-15 02:00:00	6.79	52	60	51	51	46	51.02	66	70	62	64	48.24
2022-10-15 02:02:00	6.76	52	59	51	51	46	51.11	66	70	62	64	48.22
2022-10-15 02:03:00	6.89	52	59	51	51	46	51.01	66	69	61	63	48.21
2022-10-15 02:04:00	7.03	52	59	51	51	46	51.25	65	69	61	63	48.42
2022-10-15 02:06:00	7.45	52	60	51	51	46	51.04	66	69	61	63	48.34
2022-10-15 02:09:00	7.88	52	59	51	51	46	51.05	67	70	62	64	48.37
2022-10-15 02:10:00	8.04	52	59	51	51	46	51.06	67	70	62	64	48.31
2022-10-15 02:11:00	8.21	52	60	51	51	46	51.07	67	71	63	65	48.03
2022-10-15 02:13:00	8.35	52	60	51	51	46	51.1	68	71	63	65	48.17
2022-10-15 02:14:00	8.39	52	60	51	51	46	51.08	68	71	63	65	48.12
2022-10-15 02:15:00	8.45	52	60	51	51	46	51.12	68	71	63	65	48.29
2022-10-15 02:17:00	8.56	52	60	51	51	46	51.14	68	71	63	65	48.42
2022-10-15 02:18:00	8.6	52	60	51	51	46	51.24	68	71	63	65	48.4
2022-10-15 02:23:00	8.89	52	60	52	51	47	51.21	68	71	63	64	48.63
2022-10-15 02:25:00	8.8	53	61	52	52	47	52.05	68	71	63	65	48.67
2022-10-15 02:25:00	8.77	53	61	52	52	47	52.17	68	71	63	65	48.73
2022-10-15 02:26:00	8.9	53	61	52	52	47	52.1	68	71	63	65	48.54
2022-10-15 02:27:00	8.84	53	61	52	52	47	52.04	68	72	63	65	48.54
2022-10-15 02:28:00	8.81	53	61	52	52	47	52.03	68	72	63	65	48.71
2022-10-15 02:30:00	8.75	53	61	52	52	47	52.05	69	72	63	65	48.7
2022-10-15 02:31:00	8.73	53	61	52	52	47	52.06	69	72	63	66	48.6
2022-10-15 02:32:00	8.82	53	61	52	52	47	52.24	69	72	64	66	48.51
2022-10-15 02:33:00	8.76	53	61	52	52	47	52.12	69	72	64	65	48.76
2022-10-15 02:34:00	8.82	54	61	52	52	47	52.16	68	71	63	65	48.77
2022-10-15 02:35:00	8.8	54	61	52	52	47	52.21	68	71	63	65	48.97
2022-10-15 02:36:00	8.79	54	61	52	52	47	52	68	71	63	64	48.83
2022-10-15 02:37:00	8.76	54	61	52	52	48	52.24	68	71	63	64	48.94
2022-10-15 02:38:00	8.8	54	62	53	52	48	52.18	68	71	63	64	48.8
2022-10-15 02:40:00	8.77	54	62	53	53	48	52.25	68	71	63	65	49.08
2022-10-15 02:41:00	8.93	54	62	53	53	48	52.17	68	72	63	65	48.8
2022-10-15 02:42:00	8.75	54	62	53	53	48	53.1	68	72	63	65	48.98
2022-10-15 02:43:00	8.75	54	62	53	53	48	53.13	69	72	63	65	48.93
2022-10-15 02:44:00	8.75	54	62	53	53	48	53.21	69	72	63	65	48.86
2022-10-15 02:45:00	8.75	54	62	53	53	48	53.22	69	72	64	66	48.81
2022-10-15 02:46:00	8.94	54	62	53	53	48	53.06	69	72	64	66	48.79
2022-10-15 02:48:00	8.85	54	62	53	53	48	53.05	69	72	64	65	48.86
2022-10-15 02:49:00	8.86	54	62	53	53	48	53.06	68	71	63	65	49.03
2022-10-15 02:51:00	8.93	54	62	53	53	48	53.19	68	71	63	64	49.04
2022-10-15 02:52:00	8.85	54	62	53	53	48	53.23	68	71	62	64	49.23
2022-10-15 02:53:00	8.98	55	62	54	53	48	53.06	68	71	62	64	49.17
2022-10-15 02:55:00	8.88	55	62	54	53	49	53.11	68	71	63	65	49.15
2022-10-15 02:56:00	8.94	55	63	54	53	49	53.18	68	71	63	65	49.11
2022-10-15 02:57:00	9	55	63	54	53	49	53.14	68	72	63	65	49.05
2022-10-15 02:59:00	9.29	55	63	54	53	49	53.12	69	72	63	66	49.1
2022-10-15 03:00:00	9.44	55	63	54	54	49	54.02	69	73	64	66	49.15
2022-10-15 03:01:00	9.65	55	63	54	54	49	54.13	70	73	64	66	48.92
2022-10-15 03:03:00	9.96	55	63	54	54	49	54.23	70	73	64	66	48.8
2022-10-15 03:04:00	10.09	55	63	54	54	49	54.02	70	73	64	66	49.23
2022-10-15 03:14:00	10.71	56	64	55	55	50	55.1	71	74	64	67	49.14
2022-10-15 03:18:00	10.75	56	64	55	55	50	55.15	71	75	65	67	49.39
2022-10-15 03:19:00	10.7	56	64	55	55	50	55.17	71	74	64	66	49.25
2022-10-15 03:20:00	10.71	56	64	55	55	50	55	71	74	64	66	49.25
2022-10-15 03:21:00	10.69	56	64	55	55	50	55	70	73	64	65	49.67
2022-10-15 03:23:00	10.79	56	64	55	55	50	55.1	70	73	63	65	49.51
2022-10-15 03:24:00	10.74	56	64	55	55	50	55.01	70	73	64	66	49.63
2022-10-15 03:25:00	10.8	56	64	55	55	50	55.21	71	74	64	66	49.64
2022-10-15 03:26:00	10.71	56	64	55	55	50	55.21	71	74	64	66	49.52
2022-10-15 03:27:00	10.79	56	64	55	55	50	55.09	71	74	64	66	49.57
2022-10-15 03:28:00	10.76	56	64	55	55	50	55.08	71	74	64	67	49.56
2022-10-15 03:29:00	10.68	56	64	55	55	50	55.05	71	74	65	67	49.55
2022-10-15 03:30:00	10.76	56	64	55	55	50	55.05	72	75	65	67	49.66
2022-10-15 03:31:00	10.71	56	64	55	55	50	55.01	72	75	65	67	49.61
2022-10-15 03:33:00	10.79	56	64	55	55	50	55.01	72	75	65	67	49.67
2022-10-15 03:34:00	10.73	56	64	55	55	50	55.23	71	74	64	66	49.71
2022-10-15 03:35:00	10.81	56	64	55	55	50	55.2	71	74	64	66	49.86
2022-10-15 03:36:00	10.75	56	64	55	55	50	55.13	71	73	64	65	49.85
2022-10-15 03:37:00	10.84	56	64	55	55	50	55.15	70	73	64	65	49.81
2022-10-15 03:39:00	10.93	56	64	55	55	50	55.14	71	73	64	65	49.83
2022-10-15 03:40:00	10.86	56	64	55	55	50	55.09	71	74	64	66	49.86
2022-10-15 03:41:00	10.96	56	64	55	55	50	55.06	71	74	64	66	49.98
2022-10-15 03:42:00	11.02	56	64	55	55	50	55.04	71	74	64	67	49.77
2022-10-15 03:43:00	10.81	56	64	55	55	50	55.01	72	75	64	67	49.76
2022-10-15 03:44:00	11.01	56	64	55	55	50	55.23	72	75	65	67	49.88
2022-10-15 03:45:00	11.07	56	64	55	55	50	55.2	72	75	65	67	49.87
2022-10-15 03:47:00	11.01	56	64	55	55	50	55.15	72	75	65	67	49.82
2022-10-15 03:48:00	11.14	56	64	55	55	50	55.13	72	75	65	67	49.88
2022-10-15 03:49:00	11.07	56	64	55	55	50	55.1	72	75	65	66	49.94
2022-10-15 03:50:00	11.18	57	64	55	55	50	55.05	71	74	64	66	49.92
2022-10-15 03:51:00	11.18	57	64	55	55	50	55.03	71	74	64	66	49.81
2022-10-15 03:53:00	11.13	56	65	55	55	50	55.21	71	74	64	66	50.19
2022-10-15 03:54:00	11.21	56	65	55	55	50	55.23	71	74	64	66	50.08
2022-10-15 03:55:00	11.25	57	65	55	55	50	55.16	71	74	64	66	50.11
2022-10-15 03:56:00	11.25	56	64	55	55	50	55.17	71	74	64	67	50.04
2022-10-15 03:57:00	11.31	57	64	55	55	50	55.13	72	75	65	67	49.86
2022-10-15 03:58:00	11.32	56	65	55	55	50	55.07	72	75	65	67	49.77
2022-10-15 03:59:00	11.46	57	65	55	55	50	55.04	72	75	65	67	49.77
2022-10-15 04:01:00	11.46	57	65	55	55	50	55.25	73	76	65	68	49.77
2022-10-15 04:02:00	11.44	57	65	56	55	50	55.21	73	75	65	67	49.96
2022-10-15 04:03:00	11.5	57	65	56	55	50	56.18	72	75	65	67	49.83
2022-10-15 04:04:00	11.5	57	65	56	55	50	55.16	72	75	65	66	50.01
2022-10-15 04:05:00	11.6	57	65	56	56	50	55.11	71	74	64	66	50.19
2022-10-15 04:06:00	11.44	57	65	56	56	50	56.09	71	74	64	66	50.14
2022-10-15 04:07:00	11.74	57	65	56	56	50	55.05	71	74	64	66	50.16
2022-10-15 04:09:00	11.6	57	65	56	56	50	56.01	72	74	64	66	50.05
2022-10-15 04:10:00	11.71	57	65	56	56	51	56.23	72	75	65	66	50.16
2022-10-15 04:11:00	11.65	57	65	56	56	51	56.21	72	75	65	67	50.07
2022-10-15 04:12:00	11.77	57	65	56	56	51	56.13	72	75	65	67	50.17
2022-10-15 04:13:00	11.8	58	65	56	56	51	56.1	73	75	65	67	50.18
2022-10-15 04:14:00	11.84	58	66	56	56	51	56.08	73	76	65	68	50.09
2022-10-15 04:15:00	11.82	58	66	57	56	51	56.02	73	76	65	68	50.08
2022-10-15 04:17:00	11.9	58	66	57	57	51	56.25	73	76	65	68	50.23
2022-10-15 04:18:00	11.96	58	66	57	57	51	57.22	73	75	65	67	50.08
2022-10-15 04:19:00	12.02	58	66	57	57	51	57.16	72	75	65	67	50.05
2022-10-15 04:20:00	12.15	58	66	57	57	52	57.13	72	75	64	66	50.45
2022-10-15 04:22:00	12.05	58	66	57	57	52	57.08	72	75	64	66	50.29
2022-10-15 04:23:00	12.16	58	67	58	57	52	57.07	72	75	64	66	50.38
2022-10-15 04:24:00	12.23	59	67	58	58	52	57.02	72	75	65	67	50.41
2022-10-15 04:25:00	12.19	59	67	58	58	52	58.22	72	75	65	67	50.32
2022-10-15 04:26:00	12.23	59	67	58	58	52	58.19	73	76	65	68	50.44
2022-10-15 04:27:00	12.29	59	67	58	58	53	58.16	73	76	65	68	50.48
2022-10-15 04:29:00	12.14	59	67	58	58	53	58.13	74	76	65	68	50.26
2022-10-15 04:30:00	12.2	59	67	58	58	53	58.08	74	77	66	68	50.28
2022-10-15 04:31:00	12.3	60	67	58	58	53	58.05	74	77	66	68	50.28
2022-10-15 04:32:00	12.25	60	68	59	58	53	58.04	73	76	65	67	50.42
2022-10-15 04:33:00	12.35	60	68	59	58	53	58	73	76	65	67	50.34
2022-10-15 04:34:00	12.4	60	68	59	59	53	59.23	72	75	64	67	50.43
2022-10-15 04:35:00	12.45	60	69	59	59	53	59.14	72	75	64	67	50.43
2022-10-15 04:36:00	12.51	60	68	59	59	54	59.15	72	75	64	67	50.66
2022-10-15 04:37:00	12.52	60	68	59	59	54	59.1	72	75	64	67	50.52
2022-10-15 04:38:00	12.6	60	68	59	59	54	59.05	73	75	65	67	50.56
2022-10-15 04:39:00	12.55	61	68	59	59	54	59.04	73	76	65	67	50.73
2022-10-15 04:41:00	12.65	61	69	59	59	54	59.01	73	76	65	68	50.71
2022-10-15 04:42:00	12.6	61	69	59	59	54	59.21	74	76	66	68	50.38
2022-10-15 04:43:00	12.85	61	69	59	59	54	59.17	74	77	66	68	50.41
2022-10-15 04:44:00	12.51	61	69	59	59	54	59.16	74	77	66	68	50.46
2022-10-15 04:45:00	12.68	61	69	59	59	54	59.15	74	77	66	68	50.5
2022-10-15 04:46:00	12.65	61	69	59	59	54	60.09	74	77	66	68	50.46
2022-10-15 04:47:00	12.71	61	69	60	60	54	59.07	73	76	65	67	50.67
2022-10-15 04:49:00	12.76	61	69	60	59	54	59.05	73	76	65	67	50.57
2022-10-15 04:50:00	12.76	61	69	60	59	54	59.02	73	75	65	67	50.72
2022-10-15 04:51:00	12.8	61	69	60	60	54	60.24	73	75	65	67	50.71
2022-10-15 04:52:00	12.74	61	69	60	60	54	59.22	73	75	64	67	50.54
2022-10-15 04:53:00	12.88	61	69	60	60	54	60.17	73	76	65	67	50.74
2022-10-15 04:54:00	12.88	61	69	60	60	54	60.15	74	76	65	68	50.69
2022-10-15 04:55:00	12.82	61	69	60	60	54	60.13	74	76	65	68	50.68
2022-10-15 04:56:00	13.05	61	69	60	60	54	60.06	74	77	66	68	50.7
2022-10-15 04:57:00	12.96	61	69	60	60	54	60.07	74	77	66	68	50.51
2022-10-15 04:58:00	13	61	69	60	60	54	60.01	75	77	66	69	50.74
2022-10-15 05:00:00	13.16	61	69	60	60	54	60	75	77	67	69	50.52
2022-10-15 05:00:00	13	61	69	60	60	54	60.23	75	77	66	69	50.63
2022-10-15 05:02:00	13.23	61	70	60	60	54	60.21	74	77	66	68	50.71
2022-10-15 05:03:00	13.13	61	70	60	60	54	60.2	74	77	65	67	50.61
2022-10-15 05:04:00	13	61	69	60	60	54	60.16	73	76	65	67	50.99
2022-10-15 05:05:00	13.06	61	70	60	60	54	60.11	73	76	65	67	50.92
2022-10-15 05:06:00	13.16	62	69	60	60	54	60.12	73	76	65	67	50.93
2022-10-15 05:07:00	13.23	62	70	60	60	54	60.09	73	76	65	67	50.77
2022-10-15 05:08:00	13.27	62	69	60	60	54	60.07	74	76	65	68	50.83
2022-10-15 05:09:00	13.35	62	70	60	60	55	60.03	74	77	65	68	50.98
2022-10-15 05:10:00	13.29	62	70	60	60	55	60.04	74	77	66	68	50.83
2022-10-15 05:12:00	13.35	62	69	60	60	55	60	74	77	66	68	50.82
2022-10-15 05:13:00	13.4	62	70	60	60	55	60.23	75	77	66	69	50.83
2022-10-15 05:14:00	13.3	62	70	60	60	55	60.18	75	78	67	69	50.99
2022-10-15 05:15:00	13.4	62	70	60	60	55	60.19	75	78	67	69	50.93
2022-10-15 05:16:00	13.27	62	70	60	60	54	60.18	75	77	66	68	50.89
2022-10-15 05:17:00	13.46	62	70	60	60	55	60.14	74	77	65	68	50.83
2022-10-15 05:19:00	13.46	62	70	60	60	55	60.14	74	77	65	67	50.82
2022-10-15 05:20:00	13.57	62	70	60	60	55	60.13	74	76	65	67	51.02
2022-10-15 05:21:00	13.6	62	70	61	60	55	60.11	74	76	65	67	51.22
2022-10-15 05:22:00	13.64	62	70	61	61	55	60.09	74	76	65	68	51.17
2022-10-15 05:23:00	13.7	62	70	61	61	55	61.08	74	77	65	68	51
2022-10-15 05:24:00	13.71	62	70	61	60	55	61.05	75	77	66	68	51.08
2022-10-15 05:25:00	13.63	62	70	61	61	55	61.07	75	77	66	69	51.13
2022-10-15 05:27:00	13.73	62	70	61	61	55	60.05	75	78	67	69	51.13
2022-10-15 05:27:00	13.63	62	70	61	61	55	61.04	75	78	67	69	51.03
2022-10-15 05:28:00	13.8	62	70	61	61	55	61.04	75	78	67	69	50.8
2022-10-15 05:29:00	13.68	62	71	61	61	55	60.03	75	78	67	69	51.14
2022-10-15 05:31:00	13.63	62	70	61	61	55	61.03	75	77	66	68	51.04
2022-10-15 05:32:00	13.66	62	70	61	61	55	61.03	74	77	65	68	51.13
2022-10-15 05:33:00	13.52	62	70	61	61	55	60.25	74	77	65	67	51.24
2022-10-15 05:34:00	13.74	62	71	61	61	55	61.24	74	76	65	67	51.05
2022-10-15 05:35:00	13.63	62	71	61	61	55	61.09	74	76	65	67	51.38
2022-10-15 05:36:00	13.7	62	70	61	61	55	61.08	74	77	65	68	51.33
2022-10-15 05:37:00	13.61	62	70	61	61	55	61.09	74	77	65	68	51.14
2022-10-15 05:38:00	13.7	62	70	61	61	55	61.08	74	77	66	68	51.17
2022-10-15 05:41:00	13.74	62	71	61	61	55	61.07	75	77	66	69	51.22
2022-10-15 05:41:00	13.63	62	70	61	61	55	61.07	75	78	67	69	51.03
2022-10-15 05:42:00	13.63	62	70	61	61	55	61.07	75	78	67	69	51.14
2022-10-15 05:43:00	13.6	62	70	61	61	55	61.06	75	78	67	69	51.14
2022-10-15 05:45:00	13.76	62	70	61	61	55	61.05	75	78	66	68	51.06
2022-10-15 05:46:00	13.55	62	71	61	61	55	61.04	74	77	66	68	51.22
2022-10-15 05:47:00	13.6	62	70	61	61	55	61.04	74	77	65	68	51.11
2022-10-15 05:48:00	13.59	62	70	61	61	55	61.04	74	77	65	67	51.29
2022-10-15 05:50:00	13.79	62	70	61	61	55	61.03	74	76	65	67	51.47
2022-10-15 05:51:00	13.55	62	71	61	61	55	61.03	74	76	65	68	51.37
2022-10-15 05:52:00	13.5	62	71	61	61	55	61.02	74	77	65	68	51.41
2022-10-15 05:53:00	13.63	62	70	61	61	55	61.02	74	77	66	68	51.32
2022-10-15 05:54:00	13.75	62	71	61	61	55	61.01	74	77	66	69	51.3
2022-10-15 05:55:00	13.6	62	70	61	61	55	61.01	75	78	66	69	51.01
2022-10-15 05:56:00	13.6	63	71	61	61	55	61.01	75	78	67	69	51.09
2022-10-15 05:57:00	13.64	62	71	61	61	55	61.25	75	78	67	69	51.03
2022-10-15 05:58:00	13.76	62	70	61	61	55	61.24	75	78	67	69	51.12
2022-10-15 05:59:00	13.79	62	70	61	61	55	61.23	75	77	66	68	51.21
2022-10-15 06:00:00	13.7	63	71	61	61	55	61.23	74	77	66	68	51.11
2022-10-15 06:02:00	13.61	63	71	61	61	55	61.22	74	77	65	67	51.25
2022-10-15 06:03:00	13.74	62	71	61	61	55	61.22	74	76	65	67	51.44
2022-10-15 06:04:00	13.64	62	71	61	61	55	61.21	74	76	65	67	51.47
2022-10-15 06:05:00	13.6	63	70	61	61	55	61.21	74	77	65	68	51.32
2022-10-15 06:06:00	13.91	63	71	61	61	55	61.21	74	77	65	68	51.4
2022-10-15 06:07:00	13.54	62	70	61	61	55	61.21	74	77	66	68	51.34
2022-10-15 06:08:00	13.75	62	70	61	61	55	61.21	75	77	66	69	51.35
2022-10-15 06:09:00	13.66	62	71	61	61	55	61.19	75	78	67	69	51.32
2022-10-15 06:11:00	13.66	62	71	61	61	55	61.18	75	78	67	69	51.2
2022-10-15 06:12:00	13.56	62	71	61	61	55	61.18	76	78	67	69	51.13
2022-10-15 06:14:00	13.8	63	71	61	61	55	61.18	75	77	66	68	51.26
2022-10-15 06:19:00	13.8	62	71	61	61	55	61.16	74	76	65	67	51.33
2022-10-15 06:20:00	13.64	63	71	61	61	55	61.16	74	77	65	68	51.26
2022-10-15 06:21:00	13.74	63	71	61	61	55	61.15	74	77	66	68	51.44
2022-10-15 06:22:00	13.66	63	71	61	61	55	61.13	75	77	66	68	51.43
2022-10-15 06:23:00	13.77	63	71	61	61	55	61.14	75	77	66	69	51.47
2022-10-15 06:24:00	13.63	63	71	61	61	55	61.13	75	78	67	69	51.46
2022-10-15 06:25:00	13.66	63	71	61	61	55	61.13	75	78	67	69	51.08
2022-10-15 06:27:00	13.7	63	71	61	61	55	61.12	76	78	67	69	51.09
2022-10-15 06:28:00	13.65	63	71	61	61	55	61.12	75	78	66	69	51.06
2022-10-15 06:29:00	13.66	62	71	61	61	55	61.11	75	77	66	68	51.49
2022-10-15 06:30:00	13.74	63	71	61	61	55	61.1	74	77	65	68	51.31
2022-10-15 06:31:00	13.68	63	71	61	61	55	61.1	74	77	65	67	51.29
2022-10-15 06:32:00	13.73	62	70	61	61	56	61.1	74	77	65	67	51.3
2022-10-15 06:33:00	13.76	63	71	61	61	55	61.09	74	77	65	68	51.37
2022-10-15 06:34:00	13.68	62	70	62	61	55	61.08	74	77	65	68	51.35
2022-10-15 06:36:00	13.8	63	71	61	61	55	61.09	74	77	66	68	51.25
2022-10-15 06:37:00	13.63	63	71	61	61	55	61.08	75	77	66	68	51.5
2022-10-15 06:38:00	13.7	63	71	61	61	55	61.08	75	78	66	69	51.47
2022-10-15 06:39:00	13.61	63	71	61	61	55	61.08	75	78	67	69	51.29
2022-10-15 06:40:00	13.69	63	71	61	61	55	61.07	75	78	67	69	51.34
2022-10-15 06:41:00	13.71	63	70	61	61	55	61.07	75	78	67	69	51.28
2022-10-15 06:42:00	13.63	63	71	61	61	55	61.07	75	78	66	68	51.35
2022-10-15 06:43:00	13.8	63	71	61	61	55	61.06	74	77	66	68	51.5
2022-10-15 06:44:00	13.71	63	71	61	61	55	61.06	74	77	65	68	51.38
2022-10-15 06:46:00	13.66	63	71	61	61	55	61.06	74	77	65	68	51.41
2022-10-15 06:47:00	13.66	63	71	61	61	55	61.06	74	77	65	68	51.45
2022-10-15 06:48:00	13.74	63	71	61	61	55	61.05	74	77	65	68	51.35
2022-10-15 06:49:00	13.74	63	71	61	61	55	61.04	74	77	65	68	51.46
2022-10-15 06:51:00	13.7	63	71	61	61	55	61.04	75	77	66	69	51.41
2022-10-15 06:52:00	13.74	63	71	61	61	55	61.04	75	78	67	69	51.34
2022-10-15 06:53:00	13.74	63	71	62	61	55	61.03	75	78	67	69	51.41
2022-10-15 06:55:00	13.8	63	70	61	61	55	61.03	76	78	67	69	51.44
2022-10-15 06:56:00	13.8	63	71	61	61	55	61.02	75	78	67	69	51.33
2022-10-15 06:57:00	13.74	63	71	61	61	55	61.02	75	77	66	68	51.34
2022-10-15 06:58:00	13.74	63	71	61	61	55	61.02	74	77	66	68	51.46
2022-10-15 06:59:00	13.79	63	71	61	61	55	61.01	74	77	65	68	51.34
2022-10-15 07:00:00	13.65	63	71	61	61	55	61.01	74	77	65	68	51.37
2022-10-15 07:01:00	13.64	63	71	61	61	55	61.01	74	77	65	68	51.38
2022-10-15 07:03:00	13.66	63	71	61	61	55	61	74	77	65	68	51.36
2022-10-15 07:04:00	13.68	63	71	61	61	56	61.01	74	77	66	68	51.49
2022-10-15 07:05:00	13.74	63	71	61	61	55	61.25	75	77	66	68	51.46
2022-10-15 07:06:00	13.73	63	71	61	61	56	61	75	78	66	69	51.38
2022-10-15 07:07:00	13.66	63	71	61	61	55	61	75	78	67	69	51.47
2022-10-15 07:08:00	13.69	63	71	62	61	55	62	76	78	67	69	51.31
2022-10-15 07:09:00	13.79	63	71	61	62	55	61	76	78	67	69	51.43
2022-10-15 07:10:00	13.75	63	71	61	61	56	61	75	78	67	69	51.43
2022-10-15 07:11:00	13.77	63	71	62	62	56	61	75	77	66	68	51.48
2022-10-15 07:12:00	13.75	63	71	62	61	55	61.01	74	77	66	68	51.4
2022-10-15 07:14:00	13.63	63	71	62	61	56	61.01	74	77	65	68	51.34
2022-10-15 07:15:00	13.63	63	70	62	61	55	61.01	74	77	65	68	51.33
2022-10-15 07:16:00	13.74	63	71	62	62	56	61.02	74	77	65	68	51.59
2022-10-15 07:17:00	13.69	63	71	61	61	55	61.02	74	77	65	68	51.42
2022-10-15 07:19:00	13.64	63	71	61	62	56	61.02	74	77	66	68	51.35
2022-10-15 07:20:00	13.86	63	71	62	61	55	61.03	75	77	66	69	51.36
2022-10-15 07:21:00	13.71	63	71	62	61	55	62.02	75	78	67	69	51.3
2022-10-15 07:23:00	13.63	63	71	62	61	55	61.04	76	78	67	69	51.45
2022-10-15 07:24:00	13.68	63	71	62	62	55	61.04	75	78	67	69	51.36
2022-10-15 07:25:00	13.71	63	71	62	62	55	61.04	75	78	66	69	51.26
2022-10-15 07:26:00	13.69	63	71	62	62	56	61.05	74	77	65	68	51.26
2022-10-15 07:27:00	13.64	63	71	61	61	56	61.05	74	77	65	68	51.34
2022-10-15 07:29:00	13.71	63	71	61	61	56	61.05	74	77	65	68	51.38
2022-10-15 07:30:00	13.73	63	71	61	62	55	61.06	74	76	65	67	51.42
2022-10-15 07:31:00	13.8	63	71	62	61	55	61.06	74	77	65	68	51.33
2022-10-15 07:32:00	13.74	63	71	61	61	55	61.06	74	77	65	68	51.44
2022-10-15 07:33:00	13.69	63	71	61	62	55	62.06	75	77	66	69	51.4
2022-10-15 07:35:00	13.68	63	71	61	61	56	61.08	75	77	66	69	51.35
2022-10-15 07:36:00	13.77	63	71	62	61	55	61.07	75	78	66	69	51.42
2022-10-15 07:37:00	13.73	63	71	61	61	55	61.07	75	78	67	69	51.28
2022-10-15 07:38:00	13.74	63	71	62	61	55	61.08	75	78	67	69	51.4
2022-10-15 07:39:00	13.74	63	71	61	61	55	61.07	75	78	67	69	51.35
2022-10-15 07:40:00	13.63	63	71	62	61	55	61.08	74	77	65	68	51.35
2022-10-15 07:41:00	13.7	63	71	61	61	55	61.07	74	77	65	68	51.45
2022-10-15 07:42:00	13.7	63	71	61	61	56	61.07	74	77	65	68	51.33
2022-10-15 07:44:00	13.75	63	71	62	62	56	61.07	74	76	65	68	51.48
2022-10-15 07:45:00	13.63	63	71	62	61	55	61.07	74	77	65	68	51.34
2022-10-15 07:47:00	13.73	63	71	61	61	56	61.07	74	77	66	68	51.48
2022-10-15 07:48:00	13.69	63	71	61	61	55	61.08	75	77	66	68	51.44
2022-10-15 07:49:00	13.65	63	71	61	62	55	61.08	75	77	66	69	51.45
2022-10-15 07:50:00	13.69	63	71	62	61	56	61.08	75	77	67	69	51.26
2022-10-15 07:51:00	13.8	63	71	61	62	55	62.08	75	78	67	69	51.25
2022-10-15 07:52:00	13.73	63	71	62	62	55	61.07	75	78	67	69	51.27
2022-10-15 07:53:00	13.69	63	71	62	61	56	61.07	75	78	67	69	51.35
2022-10-15 07:54:00	13.79	63	71	61	61	55	61.07	75	77	66	68	51.27
2022-10-15 07:55:00	13.71	63	71	62	62	55	61.08	74	77	65	68	51.39
2022-10-15 07:57:00	13.73	63	71	61	62	55	61.07	74	77	65	68	51.34
2022-10-15 07:58:00	13.63	63	71	62	61	56	61.07	74	76	65	68	51.34
2022-10-15 07:59:00	13.71	63	71	61	61	55	61.07	74	77	65	68	51.37
2022-10-15 08:00:00	13.69	63	71	61	62	55	61.07	74	77	65	68	51.39
2022-10-15 08:01:00	13.74	63	71	62	61	55	61.07	74	77	66	68	51.41
2022-10-15 08:03:00	13.76	63	71	62	62	55	61.07	75	77	66	69	51.43
2022-10-15 08:04:00	13.74	63	71	62	61	56	61.07	75	78	66	69	51.49
2022-10-15 08:05:00	13.68	63	71	62	62	56	61.05	75	78	67	69	51.3
2022-10-15 08:06:00	13.73	63	71	62	62	55	61.02	76	78	67	69	51.35
2022-10-15 08:07:00	13.74	63	71	62	62	56	62.25	75	78	67	69	51.48
2022-10-15 08:08:00	13.7	63	71	61	61	55	61.23	75	77	66	68	51.45
2022-10-15 08:09:00	13.64	63	71	61	61	56	61.22	74	77	66	68	51.28
2022-10-15 08:11:00	13.79	63	71	61	61	56	61.21	74	77	65	68	51.4
2022-10-15 08:12:00	13.73	63	71	61	61	56	62.19	74	77	65	68	51.46
2022-10-15 08:13:00	13.69	63	71	62	61	56	61.18	74	77	65	68	51.53
2022-10-15 08:14:00	13.73	63	71	61	61	56	61.15	74	77	65	68	51.67
2022-10-15 08:15:00	13.73	63	71	62	62	55	61.12	74	77	66	68	51.51
2022-10-15 08:17:00	13.69	63	71	62	62	56	61.1	75	77	66	69	51.35
2022-10-15 08:17:00	13.75	63	71	62	62	56	61.08	75	78	66	69	51.4
2022-10-15 08:19:00	13.68	63	71	62	61	56	61.08	75	78	67	69	51.26
2022-10-15 08:20:00	13.8	63	71	62	62	55	61.07	76	78	67	69	51.28
2022-10-15 08:21:00	13.64	63	72	62	61	56	61.06	75	78	67	69	51.48
2022-10-15 08:22:00	13.79	63	71	62	62	56	62.05	75	78	67	69	51.3
2022-10-15 08:24:00	13.57	63	71	62	62	55	62.04	75	77	66	68	51.39
2022-10-15 08:25:00	13.69	63	71	62	61	56	61.03	74	77	65	68	51.32
2022-10-15 08:26:00	13.71	63	71	62	61	56	62.02	74	77	65	68	51.63
2022-10-15 08:27:00	13.81	63	71	62	62	56	62.24	74	77	65	68	51.63
2022-10-15 08:29:00	13.63	63	71	62	62	55	62.22	74	77	65	68	51.61
2022-10-15 08:30:00	13.7	63	71	62	62	55	61.2	75	77	66	68	51.57
2022-10-15 08:31:00	13.74	63	71	62	62	56	62.2	75	78	66	69	51.5
2022-10-15 08:33:00	13.71	63	72	62	62	56	62.18	75	78	67	69	51.32
2022-10-15 08:34:00	13.73	63	71	62	62	56	61.16	76	78	67	70	51.42
2022-10-15 08:35:00	13.68	63	71	62	62	56	62.15	76	78	67	69	51.38
2022-10-15 08:36:00	13.71	63	71	62	62	56	61.14	75	78	67	69	51.42
2022-10-15 08:38:00	13.76	63	71	62	62	56	62.12	74	77	66	68	51.34
2022-10-15 08:39:00	13.71	63	71	62	62	56	62.11	74	77	65	68	51.48
2022-10-15 08:40:00	13.8	63	72	62	62	56	62.1	74	77	65	68	51.56
2022-10-15 08:41:00	13.75	63	71	62	62	56	61.1	74	77	65	68	51.68
2022-10-15 08:42:00	13.79	63	71	62	62	56	62.08	74	77	65	68	51.65
2022-10-15 08:43:00	13.71	63	71	62	62	56	62.07	74	77	65	68	51.59
2022-10-15 08:43:00	13.65	63	71	62	62	56	62.06	74	77	65	68	51.61
2022-10-15 08:44:00	13.63	64	71	62	62	56	62.05	74	77	66	68	51.51
2022-10-15 08:45:00	13.77	63	71	62	62	56	61.04	75	77	66	69	51.38
2022-10-15 08:47:00	13.69	64	71	62	62	55	62.03	75	78	67	69	51.43
2022-10-15 08:48:00	13.74	63	71	62	62	56	62.02	76	78	67	69	51.45
2022-10-15 08:49:00	13.77	63	72	62	62	56	62.02	76	78	67	70	51.25
2022-10-15 08:50:00	13.75	63	72	62	62	56	62.25	75	78	67	69	51.36
2022-10-15 08:52:00	13.7	63	71	62	62	56	62.25	75	77	66	68	51.46
2022-10-15 08:53:00	13.76	63	71	62	62	56	62.24	74	77	66	68	51.33
2022-10-15 08:54:00	13.76	63	71	62	62	56	62.23	74	77	65	68	51.58
2022-10-15 09:03:00	13.85	64	72	62	62	56	62.14	76	78	67	69	51.5
2022-10-15 09:07:00	13.85	63	72	62	62	56	62.11	74	77	66	68	51.67
2022-10-15 09:08:00	13.85	63	72	62	62	56	62.1	74	77	66	68	51.56
2022-10-15 09:09:00	13.79	63	71	62	62	56	62.09	74	77	65	68	51.68
2022-10-15 09:10:00	13.75	63	71	62	62	56	62.08	74	77	65	68	51.53
2022-10-15 09:12:00	13.84	63	72	62	62	56	62.05	74	77	66	68	51.74
2022-10-15 09:13:00	13.75	63	72	62	62	56	62.04	75	77	66	69	51.73
2022-10-15 09:14:00	13.75	63	72	62	62	56	62.02	75	78	67	69	51.63
2022-10-15 09:16:00	13.76	63	72	62	62	56	62.02	75	78	67	69	51.71
2022-10-15 09:17:00	13.73	63	72	62	62	56	62.01	76	78	67	70	51.49
2022-10-15 09:18:00	13.76	63	71	62	62	56	62.25	76	78	67	69	51.47
2022-10-15 09:20:00	13.73	63	72	62	62	56	62.24	75	78	67	69	51.33
2022-10-15 09:21:00	13.76	63	72	62	62	56	62.23	75	77	66	68	51.51
2022-10-15 09:22:00	13.85	63	72	62	62	56	62.22	74	77	65	68	51.74
2022-10-15 09:23:00	13.76	63	72	62	62	56	62.22	74	77	65	68	51.74
2022-10-15 09:25:00	13.88	63	72	62	62	56	62.2	74	77	65	68	51.74
2022-10-15 09:26:00	13.86	64	72	62	62	56	62.18	74	77	66	68	51.75
2022-10-15 09:27:00	13.81	64	72	62	62	56	62.17	75	77	66	69	51.52
2022-10-15 09:29:00	13.79	64	72	62	62	56	62.17	75	78	67	69	51.56
2022-10-15 09:30:00	13.86	64	72	62	62	56	62.15	76	78	67	70	51.6
2022-10-15 09:31:00	13.75	64	72	62	62	56	62.15	76	78	67	70	51.72
2022-10-15 09:32:00	13.82	64	72	62	62	57	62.14	76	78	67	69	51.54
2022-10-15 09:34:00	13.89	64	72	62	62	56	62.12	75	78	66	69	51.53
2022-10-15 09:35:00	13.79	64	72	62	62	56	62.11	75	77	66	68	51.65
2022-10-15 09:36:00	13.85	64	72	62	62	56	62.1	74	77	66	68	51.59
2022-10-15 09:38:00	13.86	64	72	62	62	56	62.1	74	77	66	68	51.57
2022-10-15 09:39:00	13.76	64	72	62	62	56	62.1	74	77	65	68	51.53
2022-10-15 09:40:00	13.81	64	72	62	62	56	62.08	74	77	65	68	51.71
2022-10-15 09:41:00	13.85	64	72	62	62	56	62.08	75	77	66	68	51.58
2022-10-15 09:42:00	13.8	64	72	62	62	56	62.06	75	77	66	69	51.54
2022-10-15 09:44:00	13.77	64	72	62	62	56	62.04	75	78	67	69	51.75
2022-10-15 09:45:00	13.9	64	72	62	62	56	62.03	76	78	67	69	51.59
2022-10-15 09:46:00	13.81	64	72	62	62	57	62.03	76	78	67	70	51.56
2022-10-15 09:47:00	13.71	64	72	62	62	56	62.02	76	78	67	69	51.7
2022-10-15 09:48:00	13.75	64	72	62	62	57	62.01	75	78	66	69	51.69
2022-10-15 09:50:00	13.89	64	72	62	62	56	62.25	75	77	66	68	51.63
2022-10-15 09:51:00	13.81	64	72	62	62	56	62.24	74	77	66	68	51.54
2022-10-15 09:52:00	13.79	64	72	62	62	56	62.24	74	77	65	68	51.7
2022-10-15 09:54:00	13.79	64	72	62	62	56	62.22	74	77	65	68	51.54
2022-10-15 09:55:00	13.82	64	72	62	62	57	62.2	75	77	66	68	51.56
2022-10-15 09:56:00	13.79	64	72	62	62	56	62.19	75	77	66	69	51.56
2022-10-15 09:57:00	13.85	64	72	62	62	56	62.18	75	78	67	69	51.73
2022-10-15 09:59:00	13.75	64	72	62	62	57	62.18	76	78	67	70	51.62
2022-10-15 10:00:00	13.84	64	72	62	62	56	62.16	76	78	67	70	51.64
2022-10-15 10:01:00	13.77	64	72	62	62	57	62.16	76	78	67	69	51.56
2022-10-15 10:02:00	13.93	64	72	62	62	56	62.14	75	78	67	69	51.59
2022-10-15 10:04:00	13.77	64	72	62	62	57	62.14	75	77	66	68	51.72
2022-10-15 10:06:00	13.86	64	72	62	62	56	62.11	74	77	65	68	51.86
2022-10-15 10:07:00	13.79	64	72	62	62	57	62.08	74	77	66	68	51.82
2022-10-15 10:09:00	13.79	64	72	62	63	57	62.06	74	77	66	68	51.98
2022-10-15 10:10:00	13.81	64	72	62	62	57	62.07	75	77	66	68	51.81
2022-10-15 10:11:00	13.84	64	73	62	62	56	62.05	75	78	66	69	51.64
2022-10-15 10:12:00	13.8	64	72	62	62	57	62.03	75	78	67	69	51.68
2022-10-15 10:25:00	13.79	64	73	63	62	57	62.16	75	78	66	69	51.59
2022-10-15 10:30:00	13.94	64	73	62	62	57	63.12	76	78	67	69	51.57
2022-10-15 10:31:00	13.9	64	73	62	63	57	62.12	75	78	67	69	51.71
2022-10-15 10:32:00	13.9	64	73	63	62	57	62.1	75	78	66	68	51.65
2022-10-15 10:33:00	13.86	64	73	63	62	57	63.09	75	77	66	68	51.55
2022-10-15 10:34:00	13.86	64	72	63	63	57	63.09	74	77	66	68	51.98
2022-10-15 10:36:00	13.75	64	73	63	62	57	63.08	74	77	66	68	51.76
2022-10-15 10:37:00	13.8	64	73	63	63	57	63.07	74	77	66	68	51.82
2022-10-15 10:38:00	14.05	64	73	63	63	57	63.06	75	77	66	68	51.88
2022-10-15 10:39:00	13.99	64	73	63	62	57	62.05	75	78	66	69	51.79
2022-10-15 10:40:00	13.77	64	72	63	63	57	63.04	75	78	66	69	51.81
2022-10-15 10:41:00	13.99	64	73	63	63	57	63.03	76	78	67	70	51.55
2022-10-15 10:43:00	13.86	64	73	63	63	57	63.02	76	78	67	70	51.69
2022-10-15 10:44:00	13.86	64	73	63	63	57	63.02	76	79	67	70	51.72
2022-10-15 10:45:00	13.89	64	72	63	63	57	63.25	76	78	67	69	51.53
2022-10-15 10:46:00	13.82	64	73	63	63	57	63.24	75	78	66	69	51.53
2022-10-15 10:47:00	13.86	64	73	63	63	57	62.24	75	77	66	68	51.97
2022-10-15 10:49:00	13.89	64	73	63	63	57	63.23	74	77	66	68	51.88
2022-10-15 10:50:00	14.05	65	73	63	63	57	63.21	74	77	65	68	51.97
2022-10-15 10:51:00	14.05	64	73	63	63	57	63.21	74	77	66	68	51.81
2022-10-15 10:52:00	13.82	64	73	63	63	57	63.2	74	77	65	68	51.97
2022-10-15 10:53:00	13.93	64	73	63	63	57	62.19	75	77	66	68	51.82
2022-10-15 10:54:00	13.76	64	73	63	63	57	63.19	75	78	66	69	52
2022-10-15 10:55:00	13.98	64	73	63	63	57	63.17	75	78	66	69	51.77
2022-10-15 10:56:00	13.82	64	73	63	63	57	63.16	75	78	67	69	51.74
2022-10-15 10:58:00	13.91	64	73	63	63	57	63.16	76	78	67	70	51.71
2022-10-15 10:58:00	13.91	64	73	63	63	57	63.16	76	78	67	70	51.58
2022-10-15 11:00:00	13.85	64	73	63	63	57	63.14	75	78	67	69	51.62
2022-10-15 11:01:00	13.88	64	73	63	63	57	63.13	75	77	66	69	51.7
2022-10-15 11:03:00	13.99	64	73	63	63	57	63.12	75	77	66	68	51.94
2022-10-15 11:04:00	13.99	64	73	63	63	57	63.1	75	77	66	68	51.83
2022-10-15 11:05:00	13.91	65	73	63	63	57	63.1	74	77	66	68	51.92
2022-10-15 11:07:00	13.89	64	73	63	63	57	63.09	75	77	66	68	51.86
2022-10-15 11:08:00	13.85	64	73	63	63	57	63.09	75	78	66	69	51.81
2022-10-15 11:09:00	14.05	64	73	63	63	57	63.08	75	78	67	69	51.82
2022-10-15 11:11:00	13.98	64	73	63	63	57	63.07	76	78	67	70	51.83
2022-10-15 11:12:00	13.9	64	73	63	63	57	63.06	76	79	67	70	51.62
2022-10-15 11:13:00	13.98	64	73	63	63	57	63.05	76	79	67	70	51.6
2022-10-15 11:14:00	13.98	64	73	63	63	57	63.05	76	78	67	69	51.72
2022-10-15 11:16:00	13.88	65	73	63	63	57	63.03	75	77	66	68	51.93
2022-10-15 11:17:00	13.98	64	73	63	63	57	63.01	74	77	66	68	51.89
2022-10-15 11:19:00	13.76	64	73	63	63	57	63.24	74	77	66	68	51.9
2022-10-15 11:20:00	14.05	64	73	63	63	57	63.25	74	77	66	68	51.91
2022-10-15 11:21:00	13.94	64	72	63	63	57	63.24	75	77	66	68	51.88
2022-10-15 11:23:00	13.81	65	73	63	63	57	63.22	75	77	66	69	51.81
2022-10-15 11:24:00	13.82	65	73	63	63	57	63.2	75	78	67	69	51.96
2022-10-15 11:25:00	13.82	65	73	63	63	57	63.2	76	78	67	70	51.78
2022-10-15 11:27:00	13.82	65	73	63	63	57	63.18	76	79	67	70	51.81
2022-10-15 11:28:00	13.96	65	73	63	63	57	63.18	76	78	67	69	51.77
2022-10-15 11:29:00	13.95	64	73	63	63	57	63.17	75	78	67	69	51.87
2022-10-15 11:31:00	14.05	64	73	63	63	57	63.15	75	77	66	68	51.86
2022-10-15 11:32:00	13.86	64	73	63	63	57	63.14	75	77	66	68	51.87
2022-10-15 11:33:00	13.96	65	73	63	63	57	63.14	75	77	66	68	51.98
2022-10-15 11:34:00	14	64	73	63	63	57	63.13	75	77	66	68	51.78
2022-10-15 11:34:00	13.93	64	73	63	63	57	63.12	75	77	66	68	51.92
2022-10-15 11:35:00	13.98	65	73	63	63	57	63.11	75	77	66	68	51.9
2022-10-15 11:36:00	13.88	65	73	63	63	57	63.11	75	77	66	69	51.98
2022-10-15 11:37:00	13.91	65	73	63	63	57	63.1	75	78	67	69	51.92
2022-10-15 11:38:00	13.89	64	73	63	63	57	63.08	75	78	67	69	51.96
2022-10-15 11:39:00	13.95	65	73	63	63	57	63.08	76	78	67	70	51.83
2022-10-15 11:40:00	13.95	65	73	63	63	57	63.07	76	79	67	70	51.98
2022-10-15 11:41:00	13.96	65	73	63	63	57	63.07	77	79	68	70	51.84
2022-10-15 11:42:00	14.02	64	73	63	63	57	63.06	76	79	67	70	51.77
2022-10-15 11:43:00	14.02	64	73	63	63	57	63.05	76	78	67	69	51.92
2022-10-15 11:44:00	13.88	65	73	63	63	57	63.03	75	78	66	69	51.83
2022-10-15 11:45:00	13.93	65	73	63	63	57	63.03	75	77	66	68	51.9
2022-10-15 11:46:00	14.09	65	72	63	63	57	63.02	74	77	65	68	51.76
2022-10-15 11:48:00	13.98	64	73	63	63	57	63.02	74	77	66	68	52.13
2022-10-15 11:49:00	13.93	64	73	63	63	57	63.24	74	77	66	68	52.21
2022-10-15 11:51:00	13.89	64	73	63	63	57	63.23	75	77	66	69	52.06
2022-10-15 11:52:00	13.95	65	73	63	63	57	63.22	75	77	66	69	52
2022-10-15 11:53:00	13.82	65	73	63	63	57	63.21	76	78	67	69	51.93
2022-10-15 11:54:00	13.94	65	73	63	63	57	63.21	76	78	67	70	51.78
2022-10-15 11:56:00	13.96	64	73	63	63	57	63.2	76	79	67	70	51.9
2022-10-15 11:57:00	13.94	65	73	63	63	57	63.18	76	79	67	70	51.89
2022-10-15 11:59:00	13.99	65	73	63	63	57	63.18	75	78	67	69	51.84
2022-10-15 12:00:00	14.04	65	73	63	63	57	63.17	75	77	66	68	51.79
2022-10-15 12:01:00	13.9	65	73	63	63	57	63.15	75	77	66	68	52.03
2022-10-15 12:03:00	13.77	65	73	63	63	57	63.16	75	77	66	68	52.06
2022-10-15 12:04:00	13.89	65	73	63	63	57	63.14	75	77	66	68	52.14
2022-10-15 12:05:00	13.88	65	73	63	63	57	63.12	75	77	66	69	52.17
2022-10-15 12:06:00	13.9	65	73	63	63	57	63.12	75	78	66	69	52.07
2022-10-15 12:08:00	13.98	65	73	63	63	57	63.1	75	78	67	69	51.94
2022-10-15 12:09:00	13.99	65	73	63	63	57	63.09	76	78	67	70	51.99
2022-10-15 12:10:00	13.96	65	73	63	63	57	63.09	77	79	67	70	51.79
2022-10-15 12:12:00	14	65	73	63	63	57	63.08	76	79	67	70	51.98
2022-10-15 12:13:00	13.93	65	73	63	63	57	63.06	76	78	67	69	51.81
2022-10-15 12:14:00	13.98	65	73	63	63	57	63.05	75	78	66	68	51.98
2022-10-15 12:15:00	14.05	65	73	63	63	57	63.05	75	77	66	68	52.08
2022-10-15 12:17:00	14	65	73	63	63	57	63.06	75	77	66	68	52.12
2022-10-15 12:18:00	13.89	65	73	63	63	57	63.04	75	77	66	68	52.19
2022-10-15 12:19:00	14.09	65	73	63	63	57	63.04	75	77	66	68	52.1
2022-10-15 12:20:00	13.8	65	73	63	63	57	63.03	75	77	66	69	52.22
2022-10-15 12:22:00	13.88	65	73	63	63	57	63.03	75	78	66	69	52.17
2022-10-15 12:23:00	13.94	65	73	63	63	57	63.01	76	78	67	70	51.91
2022-10-15 12:24:00	13.89	65	73	63	63	57	63	76	78	67	70	51.81
2022-10-15 12:25:00	14.11	65	73	63	63	57	63	77	79	67	70	51.87
2022-10-15 12:27:00	13.81	65	73	63	63	57	63.24	76	79	67	70	51.99
2022-10-15 12:28:00	13.91	65	73	63	63	57	63.23	75	78	67	69	51.95
2022-10-15 12:29:00	13.95	65	73	63	63	57	63.22	75	77	66	68	52.09
2022-10-15 12:31:00	13.84	65	73	63	63	57	63.21	75	77	66	68	52.02
2022-10-15 12:32:00	14.13	64	73	63	63	57	63.21	75	77	66	68	52.19
2022-10-15 12:33:00	14.1	65	73	63	63	57	63.19	75	77	66	68	52.06
2022-10-15 12:35:00	13.8	65	73	63	63	57	63.19	75	77	66	69	52.11
2022-10-15 12:36:00	14.05	65	73	63	63	57	63.19	75	78	66	69	52.03
2022-10-15 12:38:00	13.93	65	73	63	63	57	63.18	75	78	67	69	51.97
2022-10-15 12:39:00	13.88	65	73	63	63	57	63.17	76	78	67	70	51.76
2022-10-15 12:40:00	13.99	65	73	63	63	57	63.15	76	79	67	70	51.84
2022-10-15 12:42:00	14.01	65	73	63	63	57	63.14	76	79	67	70	51.84
2022-10-15 12:43:00	14.04	65	73	63	63	57	63.14	75	78	67	69	51.85
2022-10-15 12:44:00	14.1	65	73	63	63	57	63.15	75	78	66	69	51.77
2022-10-15 12:45:00	14.09	65	73	63	63	57	63.12	75	77	66	68	52.02
2022-10-15 12:47:00	14.15	65	73	63	63	57	63.12	75	77	66	68	52.2
2022-10-15 12:48:00	14.06	65	73	63	63	57	63.11	75	77	66	68	52.07
2022-10-15 12:49:00	13.93	65	73	63	63	57	63.11	75	77	66	69	52
2022-10-15 12:50:00	13.89	65	73	63	63	57	63.1	75	78	66	69	52.13
2022-10-15 12:52:00	14.09	65	73	63	63	58	63.09	75	78	67	69	52.07
2022-10-15 12:53:00	14.02	65	73	63	63	57	63.09	76	78	67	70	52.04
2022-10-15 12:54:00	14.11	65	73	63	63	57	63.09	76	79	67	70	51.97
2022-10-15 12:56:00	14	65	73	63	63	57	63.08	77	79	68	70	51.77
2022-10-15 12:57:00	14.01	65	73	63	63	57	63.08	76	79	67	70	51.87
2022-10-15 12:58:00	13.88	65	73	63	63	57	63.07	75	78	67	69	52.15
2022-10-15 13:00:00	14.09	65	73	63	63	57	63.06	75	77	66	68	52.19
2022-10-15 13:01:00	14.07	65	73	63	63	57	63.07	74	77	66	68	52.24
2022-10-15 13:02:00	14.01	65	73	63	63	57	63.06	74	77	66	68	52.07
2022-10-15 13:04:00	13.94	65	73	63	63	57	63.05	75	77	66	68	52.15
2022-10-15 13:05:00	14.02	65	73	63	63	57	63.05	75	77	66	68	52.2
2022-10-15 13:06:00	13.99	65	73	63	63	57	63.04	75	78	67	69	52.25
2022-10-15 13:07:00	14.04	65	73	63	63	57	63.03	76	78	67	69	52.21
2022-10-15 13:09:00	14.04	65	73	63	63	58	63.02	76	78	67	70	52.12
2022-10-15 13:10:00	14.04	65	73	63	64	57	63.03	77	79	68	70	51.99
2022-10-15 13:12:00	13.88	65	73	63	63	57	63.01	76	79	67	70	52
2022-10-15 13:13:00	14	65	74	63	63	58	63.01	76	78	67	69	51.98
2022-10-15 13:14:00	14.01	65	73	63	63	57	63.25	75	77	66	68	52.08
2022-10-15 13:15:00	14	65	73	63	63	57	63.24	75	77	66	68	52.15
2022-10-15 13:17:00	14.04	65	73	63	63	58	63.24	74	77	66	68	52.06
2022-10-15 13:18:00	13.96	65	73	63	63	58	63.23	75	77	66	68	52.01
2022-10-15 13:19:00	14.01	65	73	63	63	57	63.23	75	77	66	69	52.21
2022-10-15 13:20:00	14.1	65	73	63	63	57	64.45	75	78	66	69	52.16
2022-10-15 13:22:00	14.07	65	74	63	63	57	63.22	75	78	67	69	52.19
2022-10-15 13:24:00	14.04	65	73	63	63	57	63.21	76	79	67	70	51.86
2022-10-15 13:25:00	13.99	65	74	63	63	57	63.21	77	79	68	70	51.98
2022-10-15 13:27:00	14	65	73	63	63	57	63.21	76	79	67	70	51.95
2022-10-15 13:29:00	14.02	65	73	64	64	57	63.19	75	78	66	69	52.25
2022-10-15 13:30:00	14	65	73	63	64	58	63.18	75	77	66	68	52.15
2022-10-15 13:32:00	13.94	65	73	63	63	57	63.18	75	77	66	68	52.01
2022-10-15 13:33:00	14.01	65	74	64	63	58	63.18	75	77	66	68	52.1
2022-10-15 13:34:00	14.09	65	73	63	63	58	63.17	75	77	66	69	52.15
2022-10-15 13:36:00	14.15	65	73	63	63	58	63.16	75	78	67	69	52.15
2022-10-15 13:37:00	14.06	65	73	63	63	58	63.15	75	78	67	69	52.19
2022-10-15 13:38:00	14.04	65	74	63	63	58	64.29	76	79	67	70	52.05
2022-10-15 13:40:00	14.07	65	73	63	63	58	63.14	77	79	68	70	51.95
2022-10-15 13:41:00	14.14	65	73	64	63	58	63.13	76	79	67	70	51.8
2022-10-15 13:42:00	14	65	74	64	64	57	63.12	76	78	67	69	51.82
2022-10-15 13:44:00	14.06	65	73	64	63	57	63.11	75	78	66	69	52.19
2022-10-15 13:45:00	14	65	73	64	63	57	63.11	75	77	66	68	52.03
2022-10-15 13:46:00	13.96	65	73	64	63	58	64.21	75	77	66	68	52.03
2022-10-15 13:47:00	13.96	65	73	64	64	58	63.1	75	77	66	68	52.1
2022-10-15 13:49:00	13.88	65	73	64	64	58	64.19	75	77	66	68	52.01
2022-10-15 13:50:00	13.99	65	74	64	63	58	63.09	75	77	66	69	52.18
2022-10-15 13:51:00	14.05	65	73	63	64	58	64.18	75	78	67	69	52.07
2022-10-15 13:53:00	14.02	65	73	64	64	58	63.09	76	78	67	70	52.19
2022-10-15 13:54:00	14.07	65	73	64	63	58	63.08	77	79	68	70	52.1
2022-10-15 13:55:00	14.04	65	73	64	64	58	64.13	77	79	68	70	51.77
2022-10-15 13:57:00	14	65	74	64	64	58	63.06	76	79	67	69	52.01
2022-10-15 13:58:00	14.09	65	73	64	63	58	64.1	75	78	67	69	52.06
2022-10-15 13:59:00	14.07	65	73	64	64	58	63.05	75	77	66	68	52.12
2022-10-15 14:01:00	14.16	65	74	64	63	58	64.08	75	77	66	68	52.04
2022-10-15 14:02:00	14.02	65	74	64	64	58	64.07	75	77	66	68	52.05
2022-10-15 14:03:00	14.02	65	74	64	64	58	64.04	75	77	66	68	52.16
2022-10-15 14:04:00	14.14	65	74	64	64	58	63.02	75	77	66	69	52.24
2022-10-15 14:06:00	14	65	74	64	64	58	63.01	75	78	66	69	52.19
2022-10-15 14:07:00	14.06	65	74	64	64	58	64.01	75	78	67	69	52.13
2022-10-15 14:08:00	14.19	65	73	64	64	58	64.5	76	78	67	70	52.24
2022-10-15 14:09:00	14.15	65	74	64	64	58	64.01	77	79	68	70	51.8
2022-10-15 14:11:00	14.11	65	74	64	64	58	64	76	79	67	70	51.79
2022-10-15 14:12:00	14.06	65	73	64	64	58	63.24	76	78	67	69	51.79
2022-10-15 14:13:00	14.01	65	73	64	64	58	64.47	75	78	66	69	52.09
2022-10-15 14:15:00	14.06	65	73	64	64	58	64.44	75	77	66	68	52.08
2022-10-15 14:16:00	14.01	65	73	64	64	58	64.44	75	77	66	68	52.06
2022-10-15 14:17:00	14.13	65	73	64	64	58	63.22	75	77	66	68	52.07
2022-10-15 14:18:00	13.94	65	73	64	64	58	64.42	75	77	66	69	52.24
2022-10-15 14:20:00	14.02	65	74	64	64	58	64.41	75	77	66	69	52.02
2022-10-15 14:21:00	14.06	65	73	64	64	58	64.4	75	78	66	69	52.16
2022-10-15 14:21:00	14.18	65	74	64	64	58	64.39	75	78	67	69	52.1
2022-10-15 14:22:00	14.07	65	73	64	64	58	64.39	76	78	67	70	52.16
2022-10-15 14:23:00	14.02	65	74	64	64	58	64.38	76	79	67	70	52.05
2022-10-15 14:24:00	14.09	65	73	64	64	58	64.37	76	79	67	70	52.23
2022-10-15 14:25:00	14.13	65	73	64	64	58	64.36	77	79	68	70	52.11
2022-10-15 14:26:00	14.02	65	74	64	64	58	64.35	77	79	68	70	52.06
2022-10-15 14:27:00	14.09	65	74	64	64	58	64.36	76	79	67	70	52.02
2022-10-15 14:28:00	14.11	66	74	64	64	58	63.17	76	78	67	69	52.24
2022-10-15 14:29:00	14.09	65	74	64	64	58	64.33	75	78	66	69	52.08
2022-10-15 14:30:00	14.18	65	74	64	63	58	64.32	75	77	66	68	52.14
2022-10-15 14:30:00	14.07	65	74	64	64	58	64.32	75	77	66	68	52.2
2022-10-15 14:31:00	14.1	65	74	64	64	58	64.31	75	77	66	68	52.12
2022-10-15 14:32:00	13.95	65	73	64	64	58	64.29	75	77	66	68	52.4
2022-10-15 14:33:00	13.95	65	74	64	64	58	64.29	75	77	66	68	52.3
2022-10-15 14:34:00	14.23	65	74	64	64	58	64.3	75	77	66	69	52.31
2022-10-15 14:35:00	14.09	65	74	64	64	58	64.3	75	77	66	69	52.16
2022-10-15 14:36:00	14.04	65	74	64	64	58	64.29	75	78	66	69	52.25
2022-10-15 14:37:00	14.1	65	74	64	64	58	64.27	75	78	67	69	52.24
2022-10-15 14:38:00	14.09	65	74	64	64	58	64.28	76	78	67	70	52.09
2022-10-15 14:39:00	14.14	65	74	64	64	58	64.28	76	79	67	70	52.24
2022-10-15 14:39:00	14	65	74	64	64	58	64.27	76	79	67	70	52.13
2022-10-15 14:40:00	14.06	65	74	64	64	58	64.24	77	79	68	70	52.14
2022-10-15 14:41:00	14.13	65	74	64	64	58	64.24	76	79	67	70	52.18
2022-10-15 14:42:00	14.15	65	74	64	64	58	64.24	76	78	67	69	52.24
2022-10-15 14:43:00	14.09	65	74	64	64	58	64.23	75	78	67	69	52.14
2022-10-15 14:44:00	14.07	65	74	64	64	58	64.22	75	77	66	68	52
2022-10-15 14:45:00	14.05	65	74	64	64	58	64.21	75	77	66	68	52.15
2022-10-15 14:46:00	13.89	65	74	64	64	58	64.21	75	77	66	68	52.15
2022-10-15 14:47:00	14.1	65	73	64	64	58	64.2	75	77	66	68	52.23
2022-10-15 14:48:00	14.06	65	74	64	64	58	64.2	75	77	66	68	52.19
2022-10-15 14:49:00	14.05	66	74	64	64	58	64.19	75	77	66	69	52.15
2022-10-15 14:50:00	14.05	65	74	64	64	58	64.18	75	78	66	69	52.21
2022-10-15 14:50:00	13.94	65	74	64	64	58	64.19	75	78	66	69	52.09
2022-10-15 14:51:00	14.09	65	74	64	64	58	64.16	75	78	67	69	52.08
2022-10-15 14:52:00	14.13	65	74	64	64	58	64.16	76	78	67	69	52.24
2022-10-15 14:53:00	14.15	65	74	64	64	58	64.15	76	78	67	70	52.09
2022-10-15 14:54:00	14.09	65	74	64	64	58	64.14	76	79	67	70	52.24
2022-10-15 14:55:00	13.98	65	74	64	64	58	64.15	77	79	67	70	52.09
2022-10-15 14:56:00	14.14	65	74	64	64	58	64.14	77	79	67	70	52
2022-10-15 14:57:00	14.01	65	74	64	64	58	64.13	76	79	67	70	52.19
2022-10-15 14:58:00	14.1	65	74	64	64	58	64.14	76	78	67	69	52.16
2022-10-15 14:59:00	14.02	65	74	64	64	58	64.12	75	78	66	69	52.02
2022-10-15 15:00:00	14.04	66	74	64	64	58	64.11	75	77	66	68	52.1
2022-10-15 15:01:00	14.02	65	74	64	64	58	64.12	75	77	66	68	52.02
2022-10-15 15:02:00	14.23	65	74	64	64	58	64.12	75	77	66	68	52.29
2022-10-15 15:03:00	14.05	66	74	64	64	58	64.11	75	77	66	68	52.39
2022-10-15 15:04:00	14.13	65	74	64	64	58	64.1	75	77	66	69	52.35
2022-10-15 15:04:00	14.04	65	74	64	64	58	64.11	75	77	66	69	52.4
2022-10-15 15:05:00	14.15	65	74	64	64	58	64.09	75	77	66	69	52.21
2022-10-15 15:06:00	14.09	65	74	64	64	58	64.09	75	78	66	69	52.16
2022-10-15 15:07:00	14.2	65	74	64	64	58	64.09	76	78	67	69	52.21
2022-10-15 15:08:00	14.09	65	74	64	64	58	64.08	76	78	67	70	52.1
2022-10-15 15:09:00	14	65	74	64	64	58	64.06	77	79	68	70	52.03
2022-10-15 15:10:00	14.07	65	74	64	64	58	64.06	77	79	68	70	52.16
2022-10-15 15:11:00	14.24	65	74	64	64	58	64.06	77	79	68	70	52.08
2022-10-15 15:12:00	14.24	66	74	64	64	58	64.04	76	78	67	70	52.22
2022-10-15 15:13:00	14.09	65	74	64	64	58	64.04	75	78	67	69	52.15
2022-10-15 15:14:00	14.04	65	74	64	64	58	64.04	75	78	66	68	52.21
2022-10-15 15:15:00	14.07	66	73	64	64	58	64.04	75	77	66	68	52.01
2022-10-15 15:15:00	14.18	65	74	64	64	58	64.03	75	77	66	68	52.15
2022-10-15 15:16:00	14.15	66	74	64	64	58	64.02	75	77	66	68	52.49
2022-10-15 15:17:00	14.13	66	74	64	64	58	64.01	75	77	66	68	52.3
2022-10-15 15:18:00	14.06	65	74	64	64	58	64.01	75	77	66	68	52.48
2022-10-15 15:19:00	14.2	65	74	64	64	58	64.01	75	77	66	69	52.25
2022-10-15 15:20:00	14.05	65	74	64	64	58	64.49	75	78	66	69	52.16
2022-10-15 15:21:00	14.02	66	74	64	64	58	64.48	75	78	67	69	52.13
2022-10-15 15:22:00	14.23	66	74	64	64	58	64.47	76	78	67	70	52.17
2022-10-15 15:23:00	14.06	66	74	64	64	58	64.46	76	79	67	70	52.12
2022-10-15 15:24:00	14.16	66	74	64	64	58	64.46	77	79	68	71	52.08
2022-10-15 15:25:00	14.1	65	74	64	64	58	64.46	77	79	68	70	52.19
2022-10-15 15:26:00	14.18	66	74	64	64	58	64.46	76	79	67	70	52.06
2022-10-15 15:27:00	14.05	66	74	64	64	58	64.46	76	78	67	69	52.16
2022-10-15 15:28:00	14.18	66	74	64	64	58	64.45	75	78	67	69	52.07
2022-10-15 15:29:00	14.11	66	74	64	64	58	64.43	75	77	66	68	52.09
2022-10-15 15:30:00	14.01	66	74	64	64	58	64.42	75	77	66	68	52.19
2022-10-15 15:31:00	14.05	66	74	64	64	58	64.42	75	77	66	68	52.39
2022-10-15 15:32:00	14.11	66	74	64	64	58	64.42	75	77	66	68	52.46
2022-10-15 15:33:00	14.16	65	74	64	64	58	64.41	75	77	66	68	52.41
2022-10-15 15:34:00	14.04	66	74	64	64	58	64.41	75	77	66	69	52.47
2022-10-15 15:35:00	14.1	66	74	64	65	58	64.39	75	78	66	69	52.13
2022-10-15 15:36:00	14	66	74	64	64	58	64.38	75	78	67	69	52.15
2022-10-15 15:37:00	14.09	66	74	64	64	58	64.36	76	78	67	70	52.22
2022-10-15 15:38:00	14.01	66	74	64	64	58	64.36	76	79	67	70	52.11
2022-10-15 15:39:00	14.1	66	74	64	64	58	64.35	76	79	68	70	52.05
2022-10-15 15:40:00	14.06	66	74	64	64	58	64.32	77	79	67	70	52.09
2022-10-15 15:41:00	14.15	66	74	64	64	58	64.32	76	79	67	70	52.17
2022-10-15 15:41:00	14.09	65	74	64	64	58	64.33	76	78	67	70	52.11
2022-10-15 15:42:00	14.07	66	74	64	64	58	64.31	76	78	67	69	52.08
2022-10-15 15:43:00	14.04	65	74	64	64	58	64.3	75	78	66	69	52.18
2022-10-15 15:44:00	14.1	65	74	64	64	58	64.29	75	77	66	68	52.05
2022-10-15 15:45:00	13.94	66	74	64	64	58	64.3	75	77	66	68	52.24
2022-10-15 15:46:00	14.13	66	74	64	64	58	64.27	75	77	66	68	52.03
2022-10-15 15:47:00	14.11	66	74	64	64	58	64.27	75	77	66	68	52.15
2022-10-15 15:48:00	14.18	66	74	64	65	58	64.28	75	77	66	69	52.12
2022-10-15 15:49:00	14.14	66	74	64	64	58	64.27	75	77	66	69	52.12
2022-10-15 15:50:00	14.01	66	74	64	64	58	64.28	75	78	66	69	52.23
2022-10-15 15:50:00	14.04	66	74	64	64	58	64.25	75	78	67	69	52.19
2022-10-15 15:51:00	14.09	66	74	64	64	58	64.25	76	78	67	69	52.23
2022-10-15 15:52:00	14.16	66	74	64	64	58	64.25	76	78	67	70	52.1
2022-10-15 15:53:00	14.13	66	74	64	64	58	64.25	77	79	68	70	52.03
2022-10-15 15:54:00	14.11	66	74	64	64	58	64.24	77	79	68	70	52.14
2022-10-15 15:55:00	14.02	66	74	65	64	58	64.24	77	79	68	70	52.03
2022-10-15 15:56:00	14.1	66	74	64	65	58	64.24	76	79	67	70	52.08
2022-10-15 15:57:00	14.07	66	74	64	64	58	64.21	76	78	67	69	52.19
2022-10-15 15:58:00	14.07	66	74	64	64	58	64.21	75	78	66	68	52.24
2022-10-15 16:00:00	14.07	66	74	64	64	58	64.2	75	77	66	68	52.09
2022-10-15 16:01:00	14.14	66	74	64	64	58	64.2	75	77	66	68	52.26
2022-10-15 16:02:00	14.01	66	74	64	64	58	64.19	75	77	66	68	52.48
2022-10-15 16:04:00	14.07	65	74	64	64	58	64.18	75	77	66	69	52.48
2022-10-15 16:05:00	14.13	66	74	64	64	58	64.17	75	78	67	69	52.21
2022-10-15 16:06:00	14.07	66	74	64	64	58	64.15	76	78	67	69	52.02
2022-10-15 16:07:00	14.15	66	74	64	64	58	64.14	76	78	67	70	52.09
2022-10-15 16:09:00	14.18	66	74	64	65	58	64.12	77	79	68	70	52.22
2022-10-15 16:10:00	14.06	65	74	64	65	58	64.11	77	79	68	70	52.22
2022-10-15 16:11:00	14.18	66	74	64	64	58	64.11	76	78	67	69	52.14
2022-10-15 16:13:00	14.23	66	74	64	64	58	64.1	75	78	66	69	52.08
2022-10-15 16:14:00	14.07	66	74	64	64	58	64.09	75	77	66	68	52.1
2022-10-15 16:15:00	14.09	66	74	64	64	58	64.09	75	77	66	68	52.08
2022-10-15 16:16:00	14.16	66	74	65	64	58	64.08	75	77	66	68	52.34
2022-10-15 16:17:00	14.05	66	74	64	64	58	64.08	75	77	66	68	52.44
2022-10-15 16:19:00	14.15	66	74	64	64	58	64.07	75	77	66	69	52.03
2022-10-15 16:20:00	14.14	66	74	64	64	58	64.04	75	78	67	69	52.23
2022-10-15 16:21:00	14.24	66	74	65	64	58	64.04	76	78	67	69	52.16
2022-10-15 16:23:00	14.21	66	74	64	65	58	64.03	76	79	67	70	52.01
2022-10-15 16:25:00	14.16	66	74	64	65	58	64.02	77	79	67	70	52.21
2022-10-15 16:26:00	14.2	66	74	64	65	58	64.01	76	78	67	69	52.11
2022-10-15 16:28:00	14.09	66	74	65	64	58	64.01	75	78	67	69	52.11
2022-10-15 16:30:00	14.1	66	74	64	65	58	64	75	77	66	68	52.08
2022-10-15 16:31:00	14.11	66	74	64	64	58	64.48	75	77	66	68	52.22
2022-10-15 16:32:00	14.04	66	74	64	65	58	64.48	75	77	66	68	52.1
2022-10-15 16:33:00	14.07	66	74	64	64	58	64.46	75	77	66	68	52.08
2022-10-15 16:34:00	14.2	66	74	65	64	58	64.45	75	77	66	69	52.16
2022-10-15 16:35:00	14.15	66	74	64	64	58	64.45	75	78	67	69	52.18
2022-10-15 16:36:00	14.1	66	74	64	64	58	64.45	76	78	67	70	52.02
2022-10-15 16:38:00	14.13	66	74	64	64	58	64.44	76	79	68	70	52.1
2022-10-15 16:39:00	14.05	66	74	64	64	58	64.44	77	79	68	71	52.01
2022-10-15 16:40:00	14.07	66	74	64	65	58	64.42	77	79	68	70	52.02
2022-10-15 16:41:00	14.01	66	74	64	65	58	64.42	76	79	67	70	52.02
2022-10-15 16:42:00	14.21	66	74	65	64	58	64.42	75	78	67	69	52.11
2022-10-15 16:43:00	14.11	66	74	64	65	58	64.41	75	78	66	69	52.17
2022-10-15 16:44:00	14.07	66	74	64	64	58	64.39	75	77	66	68	52.02
2022-10-15 16:46:00	14.1	66	74	65	64	58	64.39	75	77	66	68	52.48
2022-10-15 16:47:00	14	66	74	64	65	58	64.4	74	77	66	68	52.29
2022-10-15 16:48:00	14.19	66	74	64	64	58	64.38	75	77	66	68	52.48
2022-10-15 16:49:00	14.18	66	74	64	65	58	64.37	75	77	66	69	52.33
2022-10-15 16:50:00	14.07	66	74	64	64	58	64.36	75	78	66	69	52.02
2022-10-15 16:51:00	14.14	66	74	64	64	58	64.36	76	78	67	70	52.25
2022-10-15 16:52:00	14.02	66	74	65	64	58	64.36	76	79	67	70	52.14
2022-10-15 16:54:00	14.09	66	74	64	64	58	65.35	77	79	68	71	52.23
2022-10-15 16:55:00	14.15	66	74	64	64	58	64.33	77	79	68	70	52.22
2022-10-15 16:56:00	14.16	66	74	65	64	58	64.32	76	79	67	70	52.2
2022-10-15 16:57:00	14.16	66	74	64	64	58	64.33	75	78	67	69	52.01
2022-10-15 16:58:00	14.23	66	74	65	64	58	64.34	75	77	66	68	52.09
2022-10-15 16:59:00	14.18	66	74	64	64	58	64.32	75	77	66	68	52.17
2022-10-15 17:00:00	14.14	66	74	64	64	58	65.32	75	77	66	68	52.48
2022-10-15 17:01:00	14.24	66	74	64	64	58	64.32	75	77	66	68	52.31
2022-10-15 17:03:00	14.3	66	74	65	64	58	64.32	75	77	66	68	52.25
2022-10-15 17:04:00	14.09	66	74	65	64	58	65.32	75	77	66	69	52.35
2022-10-15 17:05:00	14.06	66	74	65	65	58	64.31	75	78	66	69	52.05
2022-10-15 17:06:00	14.15	66	74	65	64	58	64.32	76	78	67	70	52.03
2022-10-15 17:07:00	14.23	66	74	64	65	58	65.31	76	78	67	70	52.17
2022-10-15 17:09:00	14.06	66	74	65	64	58	65.29	77	79	68	71	52.24
2022-10-15 17:09:00	14.16	66	74	64	65	58	64.3	77	79	68	70	52.13
2022-10-15 17:10:00	14.14	66	74	65	65	58	64.3	76	79	67	70	52.22
2022-10-15 17:12:00	14.15	66	74	64	64	58	64.31	76	78	67	69	52.15
2022-10-15 17:13:00	14.16	66	74	64	64	58	64.31	75	78	66	69	52.24
2022-10-15 17:14:00	14.14	66	74	64	64	58	64.3	75	77	66	68	52.09
2022-10-15 17:15:00	14.15	66	74	65	65	58	64.3	75	77	66	68	52.1
2022-10-15 17:16:00	14.1	66	74	64	64	58	64.31	75	77	66	68	52.4
2022-10-15 17:17:00	14.24	66	74	65	64	58	64.32	75	77	66	69	52.31
2022-10-15 17:18:00	14.09	66	74	65	64	58	64.32	75	77	66	69	52.3
2022-10-15 17:19:00	14.06	66	74	64	64	58	65.33	75	78	66	69	52.25
2022-10-15 17:20:00	14	66	74	65	65	58	64.35	75	78	67	69	52.23
2022-10-15 17:21:00	14.01	66	74	64	65	58	64.35	76	78	67	70	52.05
2022-10-15 17:22:00	14.24	66	74	65	64	58	64.35	76	79	67	70	52.18
2022-10-15 17:24:00	14.1	66	74	65	65	58	64.37	77	79	68	71	52.01
2022-10-15 17:25:00	14.21	66	74	65	64	58	64.38	77	79	68	70	52.2
2022-10-15 17:26:00	14.13	66	74	65	64	58	64.38	76	78	67	69	52.06
2022-10-15 17:27:00	14.02	66	74	64	64	58	64.42	76	78	67	69	52.2
2022-10-15 17:29:00	14.09	66	74	65	64	58	64.43	75	77	66	68	52.09
2022-10-15 17:30:00	14.06	66	74	65	64	58	64.47	75	77	66	68	52.36
2022-10-15 17:31:00	14.13	66	74	65	65	58	64.48	75	77	66	69	52.42
2022-10-15 17:32:00	14.24	66	74	65	64	58	65	75	77	66	69	52.33
2022-10-15 17:33:00	14.11	66	74	65	64	58	64.01	75	78	66	69	52.34
2022-10-15 17:34:00	14.21	66	74	65	64	58	64.03	75	78	66	69	52.49
2022-10-15 17:36:00	14.19	66	74	65	64	58	64.04	76	78	67	69	52.22
2022-10-15 17:37:00	14.1	66	74	65	64	58	64.05	76	78	67	70	52.1
2022-10-15 17:38:00	14.07	66	74	65	64	59	64.09	77	79	68	70	52.16
2022-10-15 17:39:00	14.24	66	74	65	64	58	64.1	77	79	68	70	52.13
2022-10-15 17:41:00	14.23	66	74	65	64	58	65.1	77	79	67	70	52.2
2022-10-15 17:42:00	14.19	66	74	65	65	58	65.13	76	78	67	69	52.23
2022-10-15 17:43:00	14.13	66	74	64	64	58	64.15	76	78	67	69	52.22
2022-10-15 17:44:00	14.09	66	74	65	64	59	64.19	75	78	66	69	52.16
2022-10-15 17:45:00	14.09	66	74	65	64	59	64.19	75	78	66	69	52.16
2022-10-15 17:47:00	14.2	66	74	65	64	58	64.23	75	77	66	69	52.45
2022-10-15 17:48:00	14.16	66	74	64	64	58	64.25	75	78	66	69	52.39
2022-10-15 17:49:00	14.13	66	74	65	65	58	64.28	75	78	66	69	52.26
2022-10-15 17:51:00	14.13	66	74	64	64	58	65.33	76	78	67	69	52.09
2022-10-15 17:52:00	14.11	66	74	65	64	58	64.34	76	78	67	70	52.07
2022-10-15 17:53:00	14.18	66	74	64	64	58	64.39	77	79	67	71	52.15
2022-10-15 17:54:00	14.14	66	74	65	64	58	64.41	77	79	68	71	52.2
2022-10-15 17:56:00	14.16	66	74	65	64	58	64.44	77	79	67	70	52.05
2022-10-15 17:57:00	14.13	66	74	65	64	58	64.47	76	79	67	69	52.16
2022-10-15 17:58:00	14.13	66	74	65	65	58	64.01	75	78	66	69	52.07
2022-10-15 17:59:00	14.18	66	74	65	65	58	64.06	75	77	66	68	52.42
2022-10-15 18:01:00	14.18	66	74	65	65	58	65.08	75	77	66	68	52.44
2022-10-15 18:02:00	14.14	66	74	64	64	58	64.13	75	77	66	68	52.47
2022-10-15 18:03:00	14.14	66	74	64	64	58	64.13	75	78	66	68	52.45
2022-10-15 18:04:00	14.16	66	74	64	65	59	64.19	75	78	67	69	52.32
2022-10-15 18:05:00	14.16	66	74	65	65	58	64.21	76	78	67	69	52.42
2022-10-15 18:06:00	14.14	66	74	65	65	58	64.21	76	78	67	70	52.16
2022-10-15 18:07:00	14.13	66	74	65	65	58	64.27	77	79	68	70	52.25
2022-10-15 18:08:00	14.13	66	74	65	64	58	64.29	77	79	68	71	52.05
2022-10-15 18:10:00	14.09	66	74	65	64	58	64.31	77	79	68	70	52.2
2022-10-15 18:11:00	14.09	66	74	64	64	58	64.33	77	79	67	70	52.21
2022-10-15 18:12:00	14	66	74	64	64	58	64.35	76	78	67	69	52.1
2022-10-15 18:13:00	14.18	66	74	64	64	58	64.4	75	78	66	69	52.22
2022-10-15 18:14:00	14.11	66	74	64	64	58	65.48	75	77	66	69	52.17
2022-10-15 18:15:00	13.99	66	74	64	64	58	64.12	75	77	66	68	52.42
2022-10-15 18:16:00	13.65	66	74	64	64	58	64.25	75	77	66	68	52.29
2022-10-15 18:18:00	13.68	66	74	64	64	58	64.32	75	77	66	69	52.26
2022-10-15 18:19:00	13.43	66	74	64	64	58	64.46	75	77	66	69	52.17
2022-10-15 18:20:00	13.4	65	74	64	64	58	64.02	75	77	66	69	52.15
2022-10-15 18:21:00	13.31	65	74	64	64	58	64.1	75	78	67	69	52.22
2022-10-15 18:22:00	13.31	65	73	64	64	58	64.15	76	78	67	70	52.13
2022-10-15 18:23:00	13.13	65	74	64	64	58	63.12	76	79	67	70	52.01
2022-10-15 18:24:00	13.18	65	73	63	64	58	63.15	76	78	67	70	52.01
2022-10-15 18:25:00	13.14	65	74	63	63	58	63.17	76	78	67	69	52.25
2022-10-15 18:26:00	13.21	65	73	64	63	58	63.18	75	78	66	69	52.24
2022-10-15 18:27:00	13.15	65	73	63	63	58	63.22	74	77	66	68	52.07
2022-10-15 18:29:00	13.27	65	73	63	63	57	63.23	74	77	65	68	52.14
2022-10-15 18:29:00	13.19	65	73	63	63	58	63.23	74	77	65	68	52.19
2022-10-15 18:31:00	13.05	65	73	63	63	58	63.23	74	77	65	68	52.06
2022-10-15 18:32:00	13.13	65	73	63	63	57	63.24	74	77	65	68	52.16
2022-10-15 18:33:00	13.04	65	73	63	63	57	63.25	74	77	66	68	52.17
2022-10-15 18:34:00	13.11	65	72	63	63	57	63.25	74	77	66	69	52.12
2022-10-15 18:35:00	13.19	64	73	63	63	57	63	75	77	66	69	52.05
2022-10-15 18:36:00	13.18	64	73	63	63	57	63.01	75	78	67	69	51.81
2022-10-15 18:37:00	13.01	64	73	63	63	57	63.02	75	78	67	70	51.85
2022-10-15 18:38:00	13.04	64	73	63	63	57	63.02	76	78	67	70	51.9
2022-10-15 18:39:00	13.01	65	73	63	63	57	63.01	76	78	67	70	51.82
2022-10-15 18:40:00	13.06	64	73	63	63	57	63.02	75	78	67	69	51.77
2022-10-15 18:41:00	13.07	64	73	63	63	57	63.02	75	78	66	69	51.81
2022-10-15 18:42:00	13.16	64	72	63	63	57	63.03	74	77	66	68	51.77
2022-10-15 18:43:00	13.11	64	73	63	63	57	63.03	74	77	66	68	51.92
2022-10-15 18:44:00	13.09	64	73	63	63	57	63.03	74	77	65	68	51.92
2022-10-15 18:46:00	13.18	64	72	63	63	57	63.03	74	77	66	68	51.92
2022-10-15 18:47:00	13.2	64	72	63	62	57	62.03	74	77	66	68	51.87
2022-10-15 18:48:00	13.27	64	73	63	63	57	63.03	74	77	66	68	51.89
2022-10-15 18:49:00	13.02	64	72	63	63	57	63.03	75	77	66	69	51.77
2022-10-15 18:50:00	13.16	64	72	63	62	57	63.03	75	77	66	69	51.99
2022-10-15 18:51:00	13.14	64	72	62	63	57	62.03	75	78	67	69	51.89
2022-10-15 18:52:00	13.16	64	73	62	63	57	62.01	76	78	67	70	51.6
2022-10-15 18:53:00	13.19	64	72	63	62	57	62.25	76	78	67	70	51.61
2022-10-15 18:54:00	13.18	64	73	63	62	57	62.24	76	78	67	69	51.69
2022-10-15 18:56:00	13.3	64	73	63	62	57	62.23	75	78	67	69	51.52
2022-10-15 18:57:00	13.27	64	73	62	62	57	62.22	75	77	66	69	51.93
2022-10-15 18:58:00	13.19	64	72	62	62	57	62.2	74	77	66	68	51.93
2022-10-15 18:59:00	13.29	64	72	62	62	57	62.19	74	77	66	68	51.93
2022-10-15 19:00:00	13.34	64	72	63	62	57	62.17	74	77	65	68	51.82
2022-10-15 19:01:00	13.31	64	72	63	63	57	62.15	74	77	65	68	51.88
2022-10-15 19:02:00	13.31	64	73	63	62	56	62.13	74	77	66	68	51.86
2022-10-15 19:03:00	13.35	64	72	62	62	57	62.12	75	77	66	69	51.78
2022-10-15 19:05:00	13.36	64	72	63	62	57	63.09	75	77	66	69	51.76
2022-10-15 19:06:00	13.44	64	72	63	62	57	63.09	75	78	67	69	51.82
2022-10-15 19:07:00	13.65	64	72	63	63	57	63.06	76	78	67	70	51.91
2022-10-15 19:08:00	13.56	64	73	63	62	57	63.04	76	78	67	70	51.52
2022-10-15 19:09:00	13.63	64	73	63	62	57	62.02	76	79	67	70	51.72
2022-10-15 19:10:00	13.55	64	73	63	63	57	62.24	75	78	67	69	51.51
2022-10-15 19:11:00	13.65	64	73	63	63	57	63.24	75	78	66	69	51.9
2022-10-15 19:12:00	13.66	64	72	63	63	57	63.22	75	77	66	68	51.99
2022-10-15 19:13:00	13.7	64	73	63	63	57	63.2	74	77	66	68	51.86
2022-10-15 19:15:00	13.79	64	73	63	62	57	63.17	74	77	66	68	51.98
2022-10-15 19:16:00	13.56	64	73	63	63	57	63.16	74	77	66	68	51.84
2022-10-15 19:17:00	13.73	64	72	63	63	57	63.14	75	77	66	69	51.82
2022-10-15 19:18:00	13.77	64	73	63	63	57	63.13	75	77	66	69	51.93
2022-10-15 19:19:00	13.81	64	73	63	63	57	63.11	75	78	67	69	51.79
2022-10-15 19:20:00	13.84	64	73	63	63	57	63.09	76	78	67	70	51.88
2022-10-15 19:22:00	13.96	64	73	63	63	57	63.08	76	78	67	70	51.78
2022-10-15 19:23:00	13.89	64	73	63	63	57	63.07	77	79	67	70	51.83
2022-10-15 19:24:00	13.98	65	73	63	63	57	63.05	77	79	67	70	51.95
2022-10-15 19:26:00	14.18	65	73	63	63	57	63.02	75	78	66	68	51.78
2022-10-15 19:27:00	14.16	65	73	63	63	57	63.02	75	77	66	68	51.85
2022-10-15 19:28:00	14.05	65	73	63	63	57	63	75	77	66	68	51.76
2022-10-15 19:31:00	13.89	65	73	63	63	57	63.24	75	77	66	68	52.05
2022-10-15 19:32:00	14.1	65	73	63	63	57	63.24	75	77	66	69	52.07
2022-10-15 19:33:00	13.98	65	73	63	63	57	63.23	75	78	66	69	52.17
2022-10-15 19:34:00	14.19	65	73	63	63	57	63.23	75	78	67	69	51.76
2022-10-15 19:35:00	14.04	65	73	63	63	57	63.23	76	78	67	69	51.76
2022-10-15 19:37:00	13.96	65	73	63	64	58	63.22	76	79	67	70	51.85
2022-10-15 19:38:00	14.05	65	73	63	63	57	63.2	77	79	68	70	51.86
2022-10-15 19:39:00	14.05	65	73	63	63	57	63.2	77	79	68	70	51.97
2022-10-15 19:40:00	14.11	65	73	63	64	57	63.19	76	78	67	69	51.76
2022-10-15 19:41:00	14.11	65	73	63	63	57	63.19	75	78	67	69	52
2022-10-15 19:42:00	14	65	73	64	63	57	63.17	75	77	66	68	52.1
2022-10-15 19:43:00	14.23	65	73	63	63	58	63.18	75	77	66	68	52.07
2022-10-15 19:44:00	14.02	65	73	63	63	58	63.17	75	77	66	68	52.18
2022-10-15 19:45:00	14.1	65	73	63	63	58	63.15	75	77	66	68	52.01
2022-10-15 19:46:00	14.05	65	73	64	63	57	63.16	75	77	66	68	52.01
2022-10-15 19:48:00	14.01	65	73	64	63	57	63.15	75	78	66	69	52.18
2022-10-15 19:49:00	14	65	73	64	63	57	63.14	75	78	67	69	52.22
2022-10-15 19:50:00	14.02	65	73	63	63	57	63.14	76	78	67	70	52.01
2022-10-15 19:51:00	14.04	65	73	63	64	58	63.14	76	79	67	70	51.93
2022-10-15 19:52:00	14.16	65	73	63	63	57	64.28	77	79	68	70	51.89
2022-10-15 19:54:00	14.07	65	73	63	63	57	63.14	76	79	67	70	51.92
2022-10-15 19:55:00	14.21	65	73	63	63	58	63.14	75	78	67	69	52
2022-10-15 19:56:00	14.07	65	73	63	63	58	63.13	75	78	66	69	52.1
2022-10-15 19:57:00	14.1	65	73	63	63	57	63.12	75	77	66	68	52.2
2022-10-15 19:58:00	14.2	65	73	63	63	57	63.12	75	77	66	68	52.02
2022-10-15 19:59:00	14.06	65	73	63	63	57	63.11	75	77	66	68	52.11
2022-10-15 20:00:00	14.13	65	73	63	63	58	63.11	75	77	66	69	52.04
2022-10-15 20:02:00	14.16	65	73	63	63	58	63.11	75	77	66	69	52.11
2022-10-15 20:03:00	14.3	65	73	64	64	57	63.1	75	78	66	69	52.05
2022-10-15 20:04:00	14.05	65	73	63	64	58	63.11	75	78	67	69	52.08
2022-10-15 20:05:00	14.02	65	73	64	63	57	63.1	76	79	67	70	52.13
2022-10-15 20:06:00	14.25	65	73	64	63	58	63.1	76	79	68	70	51.79
2022-10-15 20:07:00	14.06	65	73	64	63	57	63.1	77	79	68	70	51.87
2022-10-15 20:08:00	14.01	65	73	64	63	58	63.1	76	78	67	69	51.89
2022-10-15 20:10:00	14.3	65	73	63	64	58	63.1	76	78	67	69	52.13
2022-10-15 20:11:00	13.96	65	73	64	63	58	63.09	75	77	66	69	52
2022-10-15 20:12:00	14.05	65	73	63	63	57	63.09	75	77	66	68	52.13
2022-10-15 20:13:00	14.13	65	73	63	63	57	63.09	75	77	66	68	52.08
2022-10-15 20:14:00	14.06	65	74	64	64	57	64.16	75	77	66	68	52.08
2022-10-15 20:15:00	14.15	65	73	64	63	58	63.08	75	77	66	69	52.03
2022-10-15 20:16:00	13.94	65	73	63	63	57	63.08	75	77	66	69	52.08
2022-10-15 20:17:00	14.09	65	73	64	63	57	63.08	75	78	67	69	52.11
2022-10-15 20:19:00	14.04	65	74	63	64	58	64.15	76	78	67	70	52.15
2022-10-15 20:20:00	14.11	65	73	63	64	58	63.08	76	78	67	70	52.01
2022-10-15 20:21:00	14.05	65	73	64	64	58	63.06	77	79	68	70	52.12
2022-10-15 20:22:00	14.04	65	73	63	63	58	63.06	77	79	68	70	51.9
2022-10-15 20:23:00	14.05	65	73	64	63	58	63.05	76	79	67	70	51.93
2022-10-15 20:24:00	14.15	65	73	63	63	58	63.05	75	78	67	69	52.02
2022-10-15 20:25:00	14.01	65	73	64	63	57	63.06	75	78	66	68	52.11
2022-10-15 20:26:00	14.14	65	73	64	63	57	63.05	75	77	66	68	52.21
2022-10-15 20:28:00	14.15	65	74	63	63	57	63.05	75	77	66	68	52.14
2022-10-15 20:29:00	14.05	65	73	64	63	57	63.05	75	77	66	68	52.09
2022-10-15 20:30:00	14.11	65	73	63	63	57	63.04	75	77	66	68	52.24
2022-10-15 20:31:00	14.06	65	73	63	63	57	63.04	75	77	66	69	52.01
2022-10-15 20:32:00	14.16	65	73	63	63	57	63.04	75	78	66	69	52.21
2022-10-15 20:33:00	14.06	65	73	64	64	57	63.04	75	78	67	69	52.06
2022-10-15 20:33:00	13.93	65	73	63	63	57	63.04	75	78	67	69	52.21
2022-10-15 20:34:00	13.94	65	73	63	64	57	63.04	76	78	67	69	52.01
2022-10-15 20:35:00	14.14	65	74	63	64	57	63.04	76	78	67	70	52.11
2022-10-15 20:36:00	14.2	65	73	64	63	57	63.03	77	79	67	70	51.97
2022-10-15 20:37:00	14.14	65	73	63	63	57	63.02	77	79	67	70	51.99
2022-10-15 20:38:00	14.07	65	73	63	64	57	63.02	76	78	67	69	51.98
2022-10-15 20:39:00	14.14	65	73	63	63	57	63.01	75	78	67	69	52.2
2022-10-15 20:40:00	14.2	65	73	63	63	57	63.02	75	78	66	69	52.09
2022-10-15 20:42:00	14.04	65	73	63	63	58	63.03	75	77	66	69	52.11
2022-10-15 20:43:00	14.04	65	73	63	63	57	63.02	75	77	66	68	52.14
2022-10-15 20:44:00	14.02	65	73	64	63	57	63.01	75	77	66	69	52.19
2022-10-15 20:45:00	14.18	65	73	63	63	57	63	75	77	66	69	52.15
2022-10-15 20:46:00	14.07	65	73	63	64	58	63	75	78	66	69	52.21
2022-10-15 20:47:00	14.1	65	73	63	63	57	63	75	78	67	69	52.12
2022-10-15 20:48:00	14.19	65	73	63	64	57	63.01	76	78	67	70	52.02
2022-10-15 20:50:00	14	65	73	63	64	57	63	76	78	67	70	52.16
2022-10-15 20:51:00	14.21	65	73	63	63	58	63	77	79	68	70	52.04
2022-10-15 20:52:00	14.3	65	73	63	63	57	63.25	77	79	68	70	52.16
2022-10-15 20:53:00	14.18	65	73	63	63	58	63	76	79	67	70	52.13
2022-10-15 20:54:00	14.07	65	73	63	63	57	63.25	76	78	67	69	52.12
2022-10-15 20:55:00	14.09	65	73	63	63	57	63.24	75	77	66	69	52.03
2022-10-15 20:56:00	14.11	65	73	63	63	58	63.24	75	77	66	68	52.17
2022-10-15 20:57:00	14.01	65	73	63	64	58	63.01	75	77	66	68	52.15
2022-10-15 20:58:00	14.24	65	73	63	63	57	63	75	77	66	68	52.2
2022-10-15 20:59:00	14.2	65	73	63	63	58	63	75	77	66	69	52.07
2022-10-15 21:01:00	14.16	65	73	63	64	58	63.01	75	77	66	69	52.1
2022-10-15 21:02:00	14.16	65	74	63	63	58	63	75	78	67	69	52
2022-10-15 21:03:00	14.16	65	73	64	63	57	63.01	75	78	67	69	52.25
2022-10-15 21:04:00	14.05	65	73	64	64	58	63.01	76	78	67	70	52.03
2022-10-15 21:05:00	14.11	65	73	63	63	57	63	76	79	68	70	52.19
2022-10-15 21:06:00	14.11	65	73	63	63	57	63	77	79	68	70	52.06
2022-10-15 21:07:00	14.11	65	73	63	63	57	63	76	79	67	70	52.19
2022-10-15 21:08:00	14.15	65	73	63	63	58	63	76	78	67	69	52.2
2022-10-15 21:10:00	14.1	65	73	63	63	58	63	75	78	66	69	52.06
2022-10-15 21:11:00	14.1	65	73	63	63	57	63	75	77	66	68	52.15
2022-10-15 21:12:00	13.98	65	73	63	64	57	63.01	75	77	66	68	52.08
2022-10-15 21:13:00	13.99	65	73	63	64	57	63	75	77	66	68	52.12
2022-10-15 21:14:00	14.13	65	73	63	63	58	63	75	77	66	68	52.24
2022-10-15 21:15:00	13.96	65	73	63	63	57	63.24	75	77	66	69	52
2022-10-15 21:16:00	14.13	65	73	63	63	57	63.24	75	78	66	69	52.17
2022-10-15 21:17:00	14.23	65	74	63	63	57	63.24	75	78	67	69	52.08
2022-10-15 21:18:00	14.15	65	73	63	64	58	63.24	76	78	67	70	52.19
2022-10-15 21:20:00	14.11	65	73	64	64	57	63.24	76	79	67	70	52.09
2022-10-15 21:21:00	14.16	65	73	63	63	57	64.47	77	79	67	70	51.94
2022-10-15 21:22:00	14.15	65	73	63	63	57	63.24	76	78	67	69	51.8
2022-10-15 21:23:00	14.13	65	73	63	63	58	63.24	76	78	67	69	51.79
2022-10-15 21:24:00	14.16	65	73	63	63	57	63.24	75	78	66	69	52.16
2022-10-15 21:25:00	14.1	65	73	64	63	58	63.23	75	77	66	68	52.04
2022-10-15 21:26:00	14.16	65	73	63	63	57	63.23	75	77	66	68	52.1
2022-10-15 21:27:00	14.11	65	73	63	63	58	63.23	75	77	66	68	52.17
2022-10-15 21:28:00	14.16	65	73	63	63	58	63.23	75	77	66	68	52.06
2022-10-15 21:29:00	14.23	65	73	64	63	57	63.22	75	77	66	69	52.09
2022-10-15 21:31:00	14.11	65	73	63	64	58	63.22	75	78	66	69	52.01
2022-10-15 21:32:00	14.06	65	73	64	63	57	63.21	75	78	67	69	52.02
2022-10-15 21:33:00	14.15	65	74	63	64	57	63.22	76	78	67	70	52.03
2022-10-15 21:34:00	14.14	65	73	63	63	57	63.21	76	79	68	70	51.94
2022-10-15 21:35:00	14.23	65	73	63	64	57	63.21	77	79	68	70	51.78
2022-10-15 21:36:00	14.14	65	73	63	63	57	63.21	76	79	67	70	51.85
2022-10-15 21:38:00	14	65	73	63	63	57	63.21	75	78	67	69	52.08
2022-10-15 21:39:00	14.07	65	73	63	64	57	63.21	75	78	66	68	52.23
2022-10-15 21:40:00	14.05	65	73	63	63	58	63.21	75	77	66	68	52.12
2022-10-15 21:41:00	14.06	65	73	63	63	57	63.21	75	77	66	68	52.09
2022-10-15 21:42:00	14.2	65	73	63	63	57	63.21	75	77	66	68	52.16
2022-10-15 21:43:00	14.14	65	74	63	63	57	63.21	75	77	66	68	52.05
2022-10-15 21:44:00	14.13	65	74	64	63	57	63.2	75	77	66	69	52.09
2022-10-15 21:45:00	14.15	65	73	63	64	57	63.2	75	78	66	69	52.01
2022-10-15 21:46:00	14.1	65	73	63	63	57	63.2	76	78	67	69	52.17
2022-10-15 21:47:00	14.16	65	73	63	63	57	63.23	76	78	67	70	52.05
2022-10-15 21:49:00	14.06	65	73	63	63	57	63	76	79	68	70	52.21
2022-10-15 21:50:00	14.18	65	73	63	63	57	63	77	79	68	70	51.92
2022-10-15 21:51:00	14.09	65	74	63	63	57	63.01	76	79	67	69	51.89
2022-10-15 21:52:00	14.11	65	73	63	63	57	63.02	75	78	66	69	52.14
2022-10-15 21:54:00	14.23	65	73	63	63	58	63.02	75	77	66	68	52.2
2022-10-15 21:55:00	14.18	65	73	64	63	57	63.02	75	77	66	68	52.13
2022-10-15 21:56:00	14.04	65	73	63	63	57	63.03	75	77	66	68	52.12
2022-10-15 21:57:00	14.24	65	73	63	63	57	63.03	75	77	66	68	52.18
2022-10-15 21:58:00	14.19	65	73	63	63	57	63.03	75	77	66	68	52.2
2022-10-15 21:59:00	14.07	65	73	64	63	57	63.03	75	77	66	69	52.08
2022-10-15 22:00:00	14.11	65	73	64	63	57	63.03	75	78	67	69	52.2
2022-10-15 22:01:00	14.15	65	73	63	63	57	63.03	76	78	67	70	52.04
2022-10-15 22:03:00	14.16	65	73	63	63	57	63.04	76	78	67	70	51.96
2022-10-15 22:04:00	14.15	65	73	63	63	57	63.04	77	79	67	70	51.82
2022-10-15 22:05:00	14.01	65	73	63	63	57	63.04	76	79	67	70	51.79
2022-10-15 22:06:00	14	65	73	63	64	58	63.04	76	78	67	69	51.87
2022-10-15 22:07:00	14.06	65	73	63	64	57	63.05	75	78	66	69	51.96
2022-10-15 22:08:00	14.14	65	73	63	63	58	63.05	75	77	66	68	52.17
2022-10-15 22:09:00	14.16	65	73	63	63	57	63.06	75	77	66	68	52.12
2022-10-15 22:10:00	14.07	65	73	63	63	57	63.06	75	77	66	68	52.15
2022-10-15 22:12:00	14.1	65	73	63	63	57	63.05	75	77	66	68	52.24
2022-10-15 22:13:00	14.04	65	73	63	63	57	63.05	75	77	66	69	52
2022-10-15 22:14:00	14.06	65	73	63	63	57	63.06	75	77	66	69	52.14
2022-10-15 22:15:00	14.21	65	73	63	63	57	63.06	75	78	67	69	52.02
2022-10-15 22:16:00	14.13	65	73	63	63	57	63.07	76	78	67	70	51.85
2022-10-15 22:17:00	14.11	65	73	63	63	57	63.06	76	78	67	70	51.99
2022-10-15 22:18:00	14.18	65	73	63	63	57	63.07	77	79	68	70	51.76
2022-10-15 22:20:00	14.07	65	73	63	63	57	63.07	76	79	67	70	51.86
2022-10-15 22:21:00	14.15	65	73	63	63	57	63.08	75	78	67	69	51.77
2022-10-15 22:22:00	14.18	65	73	63	63	57	63.08	75	78	66	69	51.86
2022-10-15 22:23:00	14.01	65	73	63	63	57	63.07	75	77	66	68	52.08
2022-10-15 22:24:00	14.01	65	73	63	63	57	63.08	75	77	66	68	52.05
2022-10-15 22:27:00	14.06	65	73	63	63	57	63.06	75	77	66	68	52.24
2022-10-15 22:28:00	14.24	65	73	63	63	57	63.08	75	77	66	69	52.07
2022-10-15 22:29:00	14.05	65	73	63	63	57	63.08	75	78	67	69	52.13
2022-10-15 22:32:00	14.06	65	73	63	63	57	63.07	77	79	67	70	51.9
2022-10-15 22:33:00	14.1	65	73	63	63	57	63.07	76	79	67	70	51.86
2022-10-15 22:34:00	14.02	65	73	63	63	57	63.08	76	78	67	69	51.81
2022-10-15 22:36:00	14	65	73	63	63	57	63.08	75	78	66	69	51.76
2022-10-15 22:37:00	14.11	65	73	63	63	57	63.08	75	77	66	68	52.17
2022-10-15 22:38:00	14.15	65	73	63	63	57	63.09	75	77	66	68	52.04
2022-10-15 22:39:00	14.16	65	73	63	63	58	63.08	75	77	66	68	52.17
2022-10-15 22:40:00	14.09	65	73	63	63	57	63.08	75	77	66	68	52.03
2022-10-15 22:41:00	14.06	65	73	63	63	57	63.1	75	77	66	68	52.22
2022-10-15 22:43:00	14.25	65	73	63	63	57	63.09	75	77	66	69	52.12
2022-10-15 22:44:00	13.99	65	73	63	63	57	63.1	75	78	67	69	52.11
2022-10-15 22:45:00	13.94	65	73	63	63	57	63.08	76	78	67	69	52.16
2022-10-15 22:46:00	14.23	65	73	63	63	58	63.08	76	78	67	70	51.78
2022-10-15 22:47:00	14	65	73	63	63	57	63.08	77	79	67	70	51.89
2022-10-15 22:48:00	14.07	65	73	63	63	57	63.09	77	79	67	70	51.86
2022-10-15 22:49:00	14.02	65	73	63	63	57	63.08	76	78	67	69	51.95
2022-10-15 22:50:00	14.15	65	73	63	63	58	63.08	75	78	66	69	51.82
2022-10-15 22:51:00	14.16	65	73	63	63	57	63.08	75	77	66	68	51.9
2022-10-15 22:53:00	14.21	65	73	63	63	57	63.09	75	77	66	68	52.14
2022-10-15 22:54:00	14.13	65	73	63	63	57	63.14	75	77	66	68	52.16
2022-10-15 22:55:00	14.02	65	73	63	63	58	63.16	75	77	66	68	52.02
2022-10-15 22:56:00	14.13	65	73	63	63	57	63.18	75	77	66	69	52.23
2022-10-15 22:57:00	14.01	65	73	63	63	57	63.19	75	77	66	69	52.12
2022-10-15 22:58:00	14.13	65	73	63	63	57	63.21	75	78	67	69	52.11
2022-10-15 22:59:00	13.99	65	73	63	63	57	63.23	76	78	67	70	51.85
2022-10-15 23:01:00	14.09	65	73	63	63	58	63.23	76	79	67	70	51.79
2022-10-15 23:02:00	13.95	65	73	63	63	57	63.24	77	79	67	70	51.91
2022-10-15 23:03:00	13.99	65	73	63	63	57	63.24	76	79	67	70	51.87
2022-10-15 23:04:00	14.05	65	73	63	63	57	63.24	76	78	67	69	51.93
2022-10-15 23:05:00	14	65	73	63	63	57	63	75	78	66	69	51.75
2022-10-15 23:06:00	14.01	65	73	63	63	57	63.01	75	77	66	68	52.09
2022-10-15 23:07:00	14.06	65	73	63	63	57	63.01	75	77	66	68	52.08
2022-10-15 23:08:00	13.96	65	73	63	63	57	63.03	74	77	66	68	52.11
2022-10-15 23:09:00	14	65	73	63	63	57	63.03	75	77	66	68	52.2
2022-10-15 23:10:00	14.1	65	73	63	63	57	63.04	75	77	66	69	52.19
2022-10-15 23:12:00	14.1	65	73	63	63	57	63.05	75	77	66	69	52.09
2022-10-15 23:13:00	14.04	65	73	63	63	57	63.05	75	78	66	69	52.08
2022-10-15 23:14:00	14.04	65	73	63	63	57	63.05	75	78	67	70	51.91
2022-10-15 23:15:00	14.15	65	73	63	63	57	63.05	76	78	67	70	51.76
2022-10-15 23:16:00	14.18	65	73	63	63	57	63.06	76	79	68	70	51.87
2022-10-15 23:17:00	14.05	65	73	63	63	57	63.06	76	79	67	70	51.83
2022-10-15 23:18:00	14.1	65	73	63	63	57	63.07	76	78	67	69	51.88
2022-10-15 23:19:00	14.06	65	73	63	63	57	63.08	75	78	66	69	52
2022-10-15 23:21:00	14	65	73	63	64	57	63.08	75	77	66	68	51.84
2022-10-15 23:22:00	14.15	65	73	63	63	57	63.08	75	77	66	68	52.1
2022-10-15 23:23:00	14.02	65	73	63	63	57	63.08	74	77	66	68	52.13
2022-10-15 23:24:00	14.01	65	73	63	63	57	63.08	75	77	66	68	52.01
2022-10-15 23:25:00	13.98	65	73	63	63	57	63.09	75	77	66	69	52.24
2022-10-15 23:26:00	14.1	65	73	63	63	57	63.08	75	77	66	69	52.14
2022-10-15 23:28:00	14.01	65	73	63	63	57	63.09	75	78	67	69	51.8
2022-10-15 23:29:00	14.04	65	73	63	63	57	63.09	76	78	67	70	51.81
2022-10-15 23:30:00	14.1	65	73	63	63	57	63.1	76	79	67	70	51.92
2022-10-15 23:31:00	13.93	65	73	63	63	58	63.1	76	78	67	70	51.92
2022-10-15 23:32:00	14.16	65	73	63	63	57	63.1	76	78	67	69	51.82
2022-10-15 23:34:00	14.04	65	73	63	63	57	63.1	75	78	66	69	51.99
2022-10-15 23:35:00	14.1	65	73	63	63	57	63.11	75	77	66	68	51.93
2022-10-15 23:36:00	14.09	65	73	63	63	57	63.12	75	77	66	68	51.89
2022-10-15 23:37:00	14.16	65	73	63	63	57	63.12	75	77	66	68	52.19
2022-10-15 23:38:00	14.04	65	73	63	63	57	63.12	75	77	66	68	52
2022-10-15 23:39:00	14.11	65	73	63	63	57	63.13	75	77	66	68	52.02
2022-10-15 23:40:00	14	65	73	63	63	57	63.14	75	77	66	69	51.91
2022-10-15 23:41:00	14.05	65	73	63	63	57	63.14	75	78	67	69	51.88
2022-10-15 23:42:00	13.88	65	73	63	63	57	63.14	76	78	67	69	51.83
2022-10-15 23:44:00	14.24	65	73	63	63	57	63.14	76	78	67	70	51.92
2022-10-15 23:45:00	14.02	65	73	63	63	57	63.15	76	78	67	70	51.99
2022-10-15 23:46:00	14.05	65	73	63	63	57	63.15	76	78	67	69	51.95
2022-10-15 23:47:00	13.94	65	73	63	63	57	63.16	76	78	67	69	51.79
2022-10-15 23:48:00	14.04	65	73	63	63	57	63.16	75	77	66	69	51.93
2022-10-15 23:49:00	14.05	65	73	63	63	57	63.16	75	77	66	68	51.8
2022-10-15 23:50:00	14.1	65	73	63	63	57	63.17	75	77	66	68	51.87
2022-10-15 23:51:00	14.07	65	73	63	63	57	63.17	75	77	66	68	52.16
2022-10-15 23:53:00	14.14	65	73	63	63	57	63.18	74	77	66	68	52.01
2022-10-15 23:54:00	14.04	65	73	63	63	57	63.18	75	77	66	69	52.04
2022-10-15 23:55:00	14.13	65	73	63	63	57	63.18	75	77	66	69	52.2
2022-10-15 23:56:00	14.02	65	73	63	63	57	63.18	75	78	67	69	51.92
2022-10-15 23:57:00	14.15	65	73	63	63	58	63.19	75	78	67	69	51.87
2022-10-15 23:58:00	14.13	65	73	63	63	57	63.19	76	78	67	70	51.94
2022-10-15 23:59:00	13.94	65	73	63	63	57	63.19	76	78	67	70	51.98
2022-10-16	14.1	65	73	63	63	57	63.21	76	78	67	69	51.9
2022-10-16 00:01:00	14	65	73	63	63	57	63.2	75	78	67	69	51.98
2022-10-16 00:03:00	14.07	65	73	63	63	57	63.21	75	77	66	69	51.89
2022-10-16 00:04:00	14.18	65	74	63	63	57	63.2	75	77	66	68	51.8
2022-10-16 00:05:00	13.91	65	73	63	63	57	63.21	75	77	66	68	51.85
2022-10-16 00:06:00	14	65	73	63	63	57	63.22	74	77	66	68	52.08
2022-10-16 00:07:00	13.81	65	73	63	63	57	63.22	75	77	66	68	52.02
2022-10-16 00:08:00	14.11	65	73	63	63	57	63.23	75	77	66	69	52.09
2022-10-16 00:09:00	14.04	65	73	63	63	57	63.23	75	77	66	69	51.78
2022-10-16 00:10:00	14.01	65	73	63	63	57	63.23	75	78	67	69	51.96
2022-10-16 00:12:00	14.06	65	73	63	63	57	63.23	76	78	67	70	51.82
2022-10-16 00:13:00	14.1	65	73	63	63	57	63.23	76	78	67	70	51.83
2022-10-16 00:14:00	14.06	65	73	63	63	57	63.23	76	79	67	70	51.76
2022-10-16 00:15:00	14.05	65	73	63	63	57	63.24	76	78	67	69	51.93
2022-10-16 00:16:00	14.05	65	73	63	63	57	63.24	75	77	66	68	51.92
2022-10-16 00:17:00	13.95	65	73	63	63	57	63.24	75	77	66	68	51.77
2022-10-16 00:18:00	13.95	65	73	63	63	57	63.24	75	77	66	68	51.94
2022-10-16 00:19:00	14.07	65	73	63	63	57	63.24	74	77	66	68	52.18
2022-10-16 00:21:00	13.99	65	73	63	63	57	63	74	77	66	68	52.23
2022-10-16 00:22:00	14.01	65	73	63	63	57	63.25	75	77	66	68	52.23
2022-10-16 00:23:00	14	65	73	63	63	57	63	75	77	66	69	52.1
2022-10-16 00:24:00	14.11	65	73	63	63	57	63.25	75	78	66	69	51.85
2022-10-16 00:25:00	14.05	65	73	63	63	57	63.25	76	78	67	70	51.84
2022-10-16 00:26:00	13.98	65	73	63	63	57	63.01	76	78	67	70	51.98
2022-10-16 00:27:00	14.07	65	73	63	63	57	63.01	76	79	68	70	52
2022-10-16 00:28:00	14.11	65	73	63	63	57	63.01	76	78	67	70	51.83
2022-10-16 00:30:00	14.05	65	73	63	63	57	63.01	75	78	67	69	51.89
2022-10-16 00:39:00	14.02	65	73	63	63	57	63.04	75	78	67	69	51.78
2022-10-16 00:41:00	14.05	65	73	63	63	57	63.04	76	79	67	70	51.94
2022-10-16 00:43:00	14.04	65	73	63	63	57	63.04	76	79	67	70	51.79
2022-10-16 00:44:00	14.02	65	73	63	63	57	63.05	75	78	67	69	51.78
2022-10-16 00:45:00	13.95	65	73	63	63	57	63.06	75	78	66	68	51.88
2022-10-16 00:46:00	14.05	65	73	63	63	57	63.06	74	77	66	68	51.79
2022-10-16 00:48:00	13.96	65	73	63	63	57	63.06	74	77	66	68	51.77
2022-10-16 00:49:00	13.98	65	73	63	63	57	63.06	74	77	65	68	52
2022-10-16 00:50:00	14.01	64	73	63	63	57	63.07	74	77	66	68	52.17
2022-10-16 00:51:00	13.99	65	73	63	63	57	63.08	75	77	66	69	51.81
2022-10-16 00:52:00	13.99	64	73	63	63	57	63.08	75	78	66	69	51.79
2022-10-16 00:53:00	13.99	65	73	63	63	57	63.08	75	78	67	69	51.79
2022-10-16 00:55:00	13.99	64	73	63	63	57	63.08	76	78	67	70	51.92
2022-10-16 00:56:00	13.98	64	73	63	63	57	63.08	76	79	67	70	51.8
2022-10-16 00:57:00	14.04	65	73	63	63	57	63.09	76	78	67	69	51.8
2022-10-16 00:58:00	14	64	73	63	63	57	63.09	75	78	67	69	51.87
2022-10-16 00:59:00	14.02	65	73	63	63	57	63.09	75	77	66	68	51.76
2022-10-16 01:01:00	14.02	65	73	63	63	57	63.1	75	77	66	68	51.98
2022-10-16 01:01:00	14.09	65	72	63	63	57	63.11	74	77	66	68	51.83
2022-10-16 01:02:00	14.01	64	73	63	63	57	63.11	74	77	66	68	51.95
2022-10-16 01:02:00	14.05	64	73	63	63	57	63.11	74	77	65	68	52.09
2022-10-16 01:03:00	14.01	64	73	63	63	57	63.11	74	77	66	68	52.2
2022-10-16 01:04:00	14.1	65	73	63	63	57	63.12	74	77	66	68	52.16
2022-10-16 01:06:00	14.06	64	73	63	63	57	63.12	75	77	66	69	51.83
2022-10-16 01:07:00	14	65	73	63	63	57	63.13	75	78	66	69	51.82
2022-10-16 01:08:00	14.02	65	73	63	63	57	63.14	75	78	67	69	51.87
2022-10-16 01:09:00	13.9	65	73	63	63	57	63.13	76	78	67	70	51.97
2022-10-16 01:10:00	14.02	64	73	63	63	57	63.14	76	79	67	70	51.79
2022-10-16 01:11:00	14.01	64	73	63	63	57	63.15	76	78	67	70	51.78
2022-10-16 01:13:00	13.95	64	73	63	63	57	63.16	75	78	67	69	51.86
2022-10-16 01:14:00	14.09	65	73	63	63	57	63.16	75	77	66	68	51.77
2022-10-16 01:15:00	13.98	65	73	63	63	57	63.18	74	77	66	68	51.9
2022-10-16 01:16:00	14.05	65	73	63	63	57	63.18	74	77	66	68	51.98
2022-10-16 01:17:00	14.04	65	73	63	63	57	63.18	74	77	65	68	51.81
2022-10-16 01:19:00	14.06	65	73	63	63	57	63.19	74	77	66	68	51.97
2022-10-16 01:20:00	14.01	65	73	63	63	57	63.19	75	77	66	69	51.81
2022-10-16 01:21:00	14	65	73	63	63	57	63.19	75	77	66	69	51.77
2022-10-16 01:22:00	14.02	64	73	63	63	57	63.2	76	78	67	69	51.96
2022-10-16 01:23:00	13.99	64	73	63	63	57	63.2	76	78	67	70	51.85
2022-10-16 01:25:00	14	64	73	63	63	57	63.21	76	79	67	70	51.92
2022-10-16 01:26:00	14.01	64	73	63	63	57	63.22	76	79	67	70	51.85
2022-10-16 01:27:00	14	65	73	63	63	57	63.21	76	78	67	69	51.76
2022-10-16 01:28:00	14.02	65	73	63	63	57	63.22	75	77	66	68	51.94
2022-10-16 01:29:00	13.91	65	73	63	63	57	63.22	75	77	66	68	51.75
2022-10-16 01:30:00	14.04	64	73	63	63	57	63.22	74	77	65	68	51.99
2022-10-16 01:31:00	13.99	64	73	63	63	57	63.23	74	77	66	68	51.77
2022-10-16 01:33:00	13.98	64	73	63	63	57	63.24	74	77	66	68	51.85
2022-10-16 01:34:00	13.98	64	73	63	63	57	63.24	75	77	66	68	51.89
2022-10-16 01:35:00	13.94	64	72	63	63	57	63.25	75	77	66	69	51.93
2022-10-16 01:36:00	13.91	64	73	63	63	57	63.01	75	78	67	69	51.88
2022-10-16 01:38:00	14.09	64	73	63	63	57	63.02	76	78	67	70	52
2022-10-16 01:39:00	14.02	64	72	63	63	57	63.03	76	78	67	70	51.78
2022-10-16 01:40:00	13.95	64	73	63	63	57	63.03	76	78	67	70	51.93
2022-10-16 01:41:00	13.94	64	73	63	63	57	63.03	76	78	67	69	51.85
2022-10-16 01:43:00	14	64	73	63	63	57	63.04	75	77	66	68	51.83
2022-10-16 01:44:00	14.07	64	72	63	63	57	63.05	74	77	66	68	51.8
2022-10-16 01:45:00	14.05	65	73	63	63	57	63.06	74	77	65	68	51.76
2022-10-16 01:46:00	13.96	64	73	63	63	57	63.06	74	77	66	68	51.81
2022-10-16 01:47:00	14.07	64	73	63	63	57	63.06	74	77	65	68	51.94
2022-10-16 01:48:00	14.01	64	73	63	63	57	63.06	75	77	66	68	51.99
2022-10-16 01:49:00	13.88	64	72	63	63	57	63.07	75	77	66	69	51.95
2022-10-16 01:50:00	13.85	64	72	63	63	57	63.07	75	78	67	69	51.95
2022-10-16 01:52:00	13.81	64	73	63	63	57	63.08	76	78	67	69	51.93
2022-10-16 01:53:00	13.9	64	73	63	63	57	63.08	76	78	67	70	51.79
2022-10-16 01:54:00	14.06	64	72	63	63	57	63.08	76	78	67	70	51.94
2022-10-16 01:55:00	13.93	64	73	63	63	57	63.08	76	78	67	69	51.94
2022-10-16 01:56:00	13.82	64	73	63	63	57	63.08	75	78	66	69	51.93
2022-10-16 01:57:00	13.91	64	73	63	63	57	62.09	75	77	66	68	51.83
2022-10-16 01:59:00	13.91	64	73	63	63	57	62.09	74	77	66	68	51.98
2022-10-16 02:00:00	13.91	64	73	63	63	57	63.09	74	77	66	68	51.97
2022-10-16 02:01:00	14.01	64	72	63	62	57	63.11	74	77	65	68	51.97
2022-10-16 02:03:00	13.75	64	73	63	63	57	63.12	75	77	66	69	51.79
2022-10-16 02:04:00	13.89	64	73	63	62	57	63.12	75	78	66	69	51.91
2022-10-16 02:05:00	14.04	64	72	63	63	57	63.12	75	78	67	69	51.97
2022-10-16 02:07:00	13.81	64	72	63	63	57	63.12	76	78	67	70	51.76
2022-10-16 02:07:00	14.11	64	72	63	63	57	63.12	76	78	67	70	51.95
2022-10-16 02:08:00	13.94	64	72	63	63	57	63.12	76	78	67	70	51.72
2022-10-16 02:09:00	13.95	64	73	63	62	57	62.13	75	78	67	69	51.65
2022-10-16 02:11:00	13.9	64	72	63	63	57	62.13	75	77	66	69	51.8
2022-10-16 02:12:00	13.99	64	72	63	63	57	63.13	75	77	66	68	51.89
2022-10-16 02:13:00	13.95	64	73	63	63	57	62.13	74	77	66	68	51.86
2022-10-16 02:14:00	13.85	64	72	63	63	57	62.14	74	77	66	68	51.87
2022-10-16 02:15:00	13.89	64	72	63	62	57	63.14	74	77	66	68	51.96
2022-10-16 02:16:00	13.94	64	72	63	63	57	62.14	74	77	65	68	51.91
2022-10-16 02:17:00	14.06	64	73	63	62	57	62.14	75	77	66	68	51.98
2022-10-16 02:26:00	13.91	64	72	63	63	57	62.15	74	77	66	68	51.8
2022-10-16 02:31:00	13.96	64	72	63	63	57	62.16	75	77	66	69	51.96
2022-10-16 02:33:00	13.81	64	72	63	62	57	62.16	75	77	66	69	51.77
2022-10-16 02:34:00	13.82	64	73	62	62	57	63.16	75	78	67	69	51.79
2022-10-16 02:35:00	13.91	64	72	62	62	57	62.16	76	78	67	70	51.5
2022-10-16 02:36:00	13.98	64	72	63	63	56	62.16	76	78	67	70	51.58
2022-10-16 02:38:00	13.95	64	72	63	63	57	62.16	76	78	67	69	51.59
2022-10-16 02:39:00	13.85	64	72	63	63	57	63.16	75	78	66	69	51.62
2022-10-16 02:40:00	14.02	64	72	63	63	56	62.17	74	77	66	68	51.55
2022-10-16 02:42:00	13.85	64	72	63	63	57	62.17	74	77	66	68	51.97
2022-10-16 02:43:00	13.96	64	73	63	62	56	62.18	74	77	66	68	51.88
2022-10-16 02:44:00	13.9	64	73	63	62	57	63.18	74	77	66	68	51.97
2022-10-16 02:46:00	14.01	64	72	62	62	57	62.18	75	77	66	69	51.85
2022-10-16 02:47:00	13.99	64	72	63	62	56	62.18	75	78	67	69	51.96
2022-10-16 02:49:00	13.98	64	72	62	62	56	62.18	76	78	67	70	51.72
2022-10-16 02:50:00	13.88	64	72	62	62	57	62.18	76	78	67	70	51.52
2022-10-16 02:51:00	13.89	64	73	63	62	57	63.18	76	78	67	69	51.53
2022-10-16 02:53:00	14.05	64	72	63	63	57	62.18	75	78	67	69	51.64
2022-10-16 02:54:00	13.88	64	72	63	62	57	62.19	75	77	66	68	51.78
2022-10-16 02:55:00	13.96	64	72	63	62	57	62.19	74	77	66	68	51.94
2022-10-16 02:57:00	13.93	64	72	62	62	57	62.2	74	77	66	68	51.91
2022-10-16 02:58:00	13.95	64	72	62	62	57	62.21	74	77	65	68	51.9
2022-10-16 02:59:00	13.88	64	72	62	62	56	62.2	74	77	66	68	51.89
2022-10-16 03:01:00	13.89	64	72	63	62	57	62.21	75	77	66	69	51.92
2022-10-16 03:02:00	13.94	64	72	62	62	57	62.21	75	78	67	69	51.85
2022-10-16 03:04:00	13.94	64	73	62	62	56	62.21	76	78	67	70	51.67
2022-10-16 03:05:00	13.94	64	72	63	62	56	62.21	76	79	67	70	51.69
2022-10-16 03:06:00	13.88	64	72	62	62	57	62.2	76	78	67	69	51.52
2022-10-16 03:08:00	13.9	64	72	62	62	57	62.21	75	78	66	68	51.62
2022-10-16 03:09:00	13.99	64	72	63	63	56	62.21	74	77	66	68	51.98
2022-10-16 03:10:00	13.96	64	72	62	62	57	62.21	74	77	65	68	51.86
2022-10-16 03:11:00	13.93	64	72	62	63	57	62.22	74	77	65	68	51.96
2022-10-16 03:13:00	13.89	64	72	62	62	57	62.22	74	77	66	68	51.8
2022-10-16 03:14:00	13.91	64	72	62	62	56	62.22	75	77	66	68	51.85
2022-10-16 03:15:00	13.96	64	72	63	62	56	62.22	75	77	66	69	51.9
2022-10-16 03:16:00	13.84	64	72	63	62	57	62.22	75	78	66	69	51.98
2022-10-16 03:17:00	13.96	64	72	62	62	56	62.22	75	78	67	69	51.57
2022-10-16 03:19:00	13.93	64	72	62	63	56	62.22	76	78	67	70	51.63
2022-10-16 03:20:00	13.86	64	72	62	62	57	62.22	76	78	67	70	51.67
2022-10-16 03:21:00	13.88	64	72	62	62	57	62.22	76	78	67	69	51.65
2022-10-16 03:22:00	13.88	64	72	62	62	57	62.23	75	77	66	68	51.57
2022-10-16 03:23:00	14.04	64	72	62	62	56	62.22	74	77	66	68	51.64
2022-10-16 03:24:00	13.88	64	72	62	62	56	62.23	74	77	65	68	51.84
2022-10-16 03:26:00	14.05	64	72	62	62	57	62.23	74	77	65	68	51.85
2022-10-16 03:27:00	14.09	64	72	62	62	56	62.24	74	77	65	68	51.92
2022-10-16 03:28:00	13.9	64	72	62	62	56	62.23	74	77	65	68	51.87
2022-10-16 03:29:00	13.93	64	72	62	62	56	62.24	75	77	66	69	51.76
2022-10-16 03:30:00	14.11	64	72	62	62	56	62.24	75	77	66	69	51.86
2022-10-16 03:31:00	13.89	64	72	62	62	57	62.24	75	78	67	69	51.64
2022-10-16 03:32:00	13.91	64	72	62	62	56	62.25	76	78	67	70	51.74
2022-10-16 03:33:00	13.91	64	72	62	62	57	62.25	76	78	67	70	51.55
2022-10-16 03:34:00	13.9	64	72	62	62	57	62.25	76	78	67	70	51.52
2022-10-16 03:36:00	13.98	64	72	62	62	56	62.24	75	78	67	69	51.7
2022-10-16 03:37:00	13.9	64	72	62	62	56	62.24	75	77	66	68	51.68
2022-10-16 03:38:00	13.82	64	72	62	62	56	62.25	74	77	66	68	51.81
2022-10-16 03:39:00	13.84	64	72	62	62	56	62.25	74	77	65	68	51.77
2022-10-16 03:40:00	13.95	64	72	62	62	56	62	74	77	65	68	51.96
2022-10-16 03:41:00	13.96	64	72	62	62	56	62.01	74	77	65	68	51.91
2022-10-16 03:42:00	13.91	64	72	62	62	56	62.01	75	77	66	68	51.97
2022-10-16 03:44:00	13.93	64	72	62	62	56	62.01	75	77	66	69	51.79
2022-10-16 03:45:00	13.81	64	72	62	62	56	62.02	75	78	66	69	51.56
2022-10-16 03:46:00	13.89	64	72	62	62	56	62.02	75	78	67	70	51.56
2022-10-16 03:47:00	13.9	64	72	62	62	56	62.02	76	78	67	70	51.62
2022-10-16 03:48:00	13.82	64	72	62	62	56	62.03	76	78	67	70	51.57
2022-10-16 03:50:00	13.84	64	72	62	62	56	62.03	75	78	67	69	51.7
2022-10-16 03:51:00	13.76	64	72	62	62	56	62.04	75	77	66	68	51.61
2022-10-16 03:52:00	13.96	64	72	62	62	56	62.04	74	77	66	68	51.57
2022-10-16 03:53:00	13.85	64	72	62	62	56	62.04	74	77	65	68	51.76
2022-10-16 03:54:00	13.75	64	72	62	62	56	62.04	74	77	65	68	51.97
2022-10-16 03:56:00	13.82	64	72	62	62	56	62.04	74	77	65	68	51.9
2022-10-16 03:57:00	13.91	64	72	62	62	56	62.04	75	77	66	69	51.78
2022-10-16 03:58:00	13.81	64	72	62	62	56	62.04	75	77	66	69	51.97
2022-10-16 03:59:00	13.81	64	72	62	62	56	62.05	75	78	67	69	51.62
2022-10-16 04:01:00	13.77	64	72	62	62	56	62.06	76	78	67	70	51.55
2022-10-16 04:02:00	13.99	64	72	62	62	56	62.06	76	78	67	70	51.59
2022-10-16 04:03:00	13.7	64	72	62	62	56	62.06	75	78	67	69	51.55
2022-10-16 04:04:00	13.82	64	72	62	62	56	62.07	75	78	67	69	51.64
2022-10-16 04:06:00	13.79	64	72	62	62	56	62.07	74	77	66	68	51.64
2022-10-16 04:07:00	13.81	64	72	62	62	57	62.08	74	77	66	68	51.64
2022-10-16 04:08:00	13.79	64	72	62	62	56	62.08	74	77	65	68	51.8
2022-10-16 04:10:00	13.77	63	72	62	62	56	62.08	74	77	66	68	51.96
2022-10-16 04:11:00	13.74	63	72	62	62	56	62.08	75	77	66	69	51.83
2022-10-16 04:12:00	13.86	64	72	62	62	56	62.08	75	78	66	69	51.67
2022-10-16 04:13:00	13.85	63	72	62	62	56	62.09	75	78	67	69	51.72
2022-10-16 04:15:00	13.85	63	72	62	62	56	62.09	76	78	67	70	51.53
2022-10-16 04:16:00	13.5	63	72	62	62	56	62.1	76	78	67	70	51.62
2022-10-16 04:17:00	13.69	64	72	62	62	56	62.1	76	78	67	70	51.53
2022-10-16 04:18:00	13.71	63	71	62	62	56	62.1	75	77	66	69	51.73
2022-10-16 04:19:00	13.69	64	72	62	62	56	62.1	74	77	66	68	51.55
2022-10-16 04:21:00	13.64	63	72	62	62	56	62.11	74	77	65	68	51.93
2022-10-16 04:21:00	13.74	63	72	62	62	56	62.11	74	77	66	68	51.78
2022-10-16 04:22:00	13.77	63	72	62	62	56	62.11	74	77	65	68	51.77
2022-10-16 04:23:00	13.57	64	72	62	62	56	62.12	74	76	65	68	51.86
2022-10-16 04:24:00	13.56	63	72	62	62	56	62.12	74	77	66	68	51.85
2022-10-16 04:25:00	13.64	63	72	62	62	56	62.12	74	77	66	69	51.75
2022-10-16 04:27:00	13.66	63	72	62	62	56	62.13	75	77	66	69	51.61
2022-10-16 04:28:00	13.65	63	72	62	62	56	62.13	75	78	67	69	51.64
2022-10-16 04:28:00	13.64	63	72	62	62	56	62.13	75	78	67	70	51.54
2022-10-16 04:29:00	13.71	63	71	62	62	56	62.13	75	78	67	69	51.7
2022-10-16 04:30:00	13.73	63	71	62	62	56	62.14	76	78	67	70	51.52
2022-10-16 04:31:00	13.5	63	72	62	62	56	62.14	76	78	67	70	51.75
2022-10-16 04:32:00	13.63	63	72	62	62	56	62.14	75	78	66	69	51.75
2022-10-16 04:33:00	13.65	63	72	62	62	56	62.14	75	77	66	68	51.7
2022-10-16 04:34:00	13.61	63	72	62	61	56	62.15	74	77	66	68	51.63
2022-10-16 04:36:00	13.65	63	72	62	62	56	62.16	74	77	65	68	51.55
2022-10-16 04:37:00	13.57	63	72	62	62	56	62.16	74	77	65	68	51.56
2022-10-16 04:38:00	13.73	64	72	62	62	56	62.16	74	77	65	68	51.66
2022-10-16 04:38:00	13.57	63	71	62	62	55	62.16	74	77	65	68	51.61
2022-10-16 04:39:00	13.68	63	71	62	62	56	62.16	74	77	66	68	51.7
2022-10-16 04:41:00	13.55	63	72	62	62	56	62.16	75	77	66	69	51.52
2022-10-16 04:42:00	13.68	63	72	62	62	56	62.16	75	77	66	69	51.51
2022-10-16 04:43:00	13.56	63	72	62	62	56	62.17	75	78	67	69	51.53
2022-10-16 04:44:00	13.63	63	72	62	62	56	62.16	75	78	67	69	51.72
2022-10-16 04:45:00	13.65	63	71	62	61	56	61.18	75	78	67	69	51.7
2022-10-16 04:46:00	13.68	63	71	62	62	56	62.17	75	78	67	69	51.7
2022-10-16 04:48:00	13.68	63	71	62	62	56	61.18	75	77	66	68	51.68
2022-10-16 04:49:00	13.52	63	72	62	62	56	62.18	74	77	66	68	51.65
2022-10-16 04:50:00	13.66	63	72	62	62	56	61.18	74	77	65	68	51.59
2022-10-16 04:51:00	13.52	63	72	62	62	56	62.19	74	77	65	68	51.52
2022-10-16 04:53:00	13.57	63	72	62	62	56	62.19	74	77	66	68	51.72
2022-10-16 04:54:00	13.63	63	71	62	62	56	62.2	74	77	66	68	51.53
2022-10-16 04:55:00	13.69	63	72	62	62	56	61.2	75	77	66	69	51.59
2022-10-16 04:56:00	13.57	63	72	62	62	55	61.2	75	77	67	69	51.64
2022-10-16 04:57:00	13.61	63	71	62	61	56	62.21	75	78	67	70	51.68
2022-10-16 04:59:00	13.68	63	71	62	61	56	61.2	76	78	67	70	51.67
2022-10-16 05:00:00	13.64	63	72	62	62	56	62.21	76	78	67	69	51.55
2022-10-16 05:01:00	13.63	63	71	62	62	56	62.21	75	77	66	68	51.71
2022-10-16 05:02:00	13.54	63	71	62	62	55	62.22	74	77	66	68	51.51
2022-10-16 05:04:00	13.52	63	71	62	62	56	61.21	74	77	65	68	51.65
2022-10-16 05:05:00	13.5	63	71	61	62	56	62.22	74	76	65	68	51.73
2022-10-16 05:06:00	13.61	63	71	62	62	55	61.22	74	76	65	68	51.81
2022-10-16 05:07:00	13.55	63	71	62	62	55	61.22	74	77	65	68	51.52
2022-10-16 05:08:00	13.61	63	71	62	62	56	61.22	74	77	66	68	51.72
2022-10-16 05:09:00	13.51	63	71	62	61	55	61.22	75	77	66	69	51.72
2022-10-16 05:11:00	13.54	63	71	62	62	55	61.23	75	77	66	69	51.52
2022-10-16 05:12:00	13.6	63	71	61	62	55	61.23	75	78	67	69	51.52
2022-10-16 05:13:00	13.65	63	71	61	61	55	61.23	75	78	67	70	51.61
2022-10-16 05:14:00	13.61	63	71	61	61	55	61.22	75	78	67	69	51.63
2022-10-16 05:15:00	13.55	63	71	61	61	56	62.23	75	77	66	68	51.55
2022-10-16 05:17:00	13.48	63	72	61	61	56	61.23	74	77	66	68	51.65
2022-10-16 05:18:00	13.54	63	72	61	62	55	61.23	74	77	65	68	51.58
2022-10-16 05:19:00	13.54	63	71	61	62	56	61.23	74	77	65	68	51.71
2022-10-16 05:20:00	13.6	63	71	61	61	55	61.23	74	76	65	68	51.57
2022-10-16 05:22:00	13.5	63	71	61	61	56	61.23	74	77	65	68	51.57
2022-10-16 05:23:00	13.65	63	71	61	61	55	61.24	74	77	66	69	51.55
2022-10-16 05:24:00	13.61	63	71	61	61	55	61.23	75	77	66	69	51.56
2022-10-16 05:25:00	13.59	63	71	61	61	55	61.24	75	78	67	69	51.54
2022-10-16 05:27:00	13.64	63	71	61	61	55	61.24	75	78	67	70	51.65
[truncated: 501 more rows]
